1     **Host protection to intestinal worm infections: the importance of activated and armed**  
2                                   **innate effector cells at the host parasite interface.**

3  
4     Anupama Ariyaratne<sup>1</sup>, Sang Yong Kim<sup>2</sup>, Stephen M. J. Pollo<sup>3</sup>, Mayara de Cassia Luzzi<sup>1,4</sup>,  
5     Joel Bowron<sup>1</sup>, Edina Szabo<sup>1</sup>, James D. Wasmuth<sup>3</sup>, Meera G. Nair<sup>2</sup>, Constance A. M. Finney<sup>1</sup>

6  
7     <sup>1</sup>Department of Biological Sciences, Faculty of Science, University of Calgary, Calgary,  
8     Alberta, Canada.

9     <sup>2</sup> School of Medicine, University of California Riverside, California, USA.

10    <sup>3</sup> Department of Ecosystems and Public Health, Faculty of Veterinary Medicine, University  
11    of Calgary, Alberta, Canada.

12    <sup>4</sup> Department of Veterinary Pathology, São Paulo State University - UNESP, Jaboticabal,  
13    SP, Brazil

14  
15  
16  
17    **Corresponding Author:** Constance A. M. Finney, [constance.finney@ucalgary.ca](mailto:constance.finney@ucalgary.ca), Faculty  
18    of Science, Department of Biological Sciences, University of Calgary, 2500 University Drive  
19    N.W., Calgary, Alberta, Canada.

20  
21    **Keywords:** parasitic worm infections, nematodes, granuloma, innate immunity, antibody  
22    responses

24 **ABSTRACT**

25

26 Intestinal roundworms cause chronic debilitating disease in animals, including humans.

27 A lack of effective vaccines and the emergence of widespread drug resistance only

28 increase the need to better understand parasite clearance mechanisms within the host.

29 *Heligmosomoides polygyrus* larvae induce a strong intestinal granuloma response within

30 their murine host, which has been associated with resistance. Immune cells, mostly

31 alternatively activated macrophages and eosinophils, accumulate around the tissue

32 encysted parasites to immobilize and damage/kill developing worms. In a one dose

33 (bolus) experimental infection, infected C57Bl/6 mice are unable to clear parasites

34 which results in chronic infection with high worm burdens. However, using a frequent

35 dose trickle model of infection, we, like others, have found that C57Bl/6 mice can clear

36 infection. We found that the clearance is associated with higher granuloma numbers,

37 but no changes in systemic/intestinal Th2 responses. Within the granulomas, we found

38 that myeloid cells had a different transcriptional profile in each of the infected groups,

39 and that high IgG1, but not IgG2c, IgA or IgE, levels were observed around the larvae of

40 only trickle-infected mice. Our results highlight the importance of the granuloma in the

41 host's ability to clear *H. polygyrus* and emphasise the need to study this key tissue in

42 more depth, rather than using correlates such as general intestinal or systemic

43 responses.

45 **AUTHOR'S SUMMARY**

46

47 Despite decades of research on intestinal parasitic worms, we are still unable to clearly  
48 point to why so many people (approximately 1.8 billion) and most livestock/wild animals  
49 are infected with these parasites. We have made progress in understanding how the  
50 immune system responds to parasitic worms, and how these parasites manipulate our  
51 immune system. However, identifying effective clearance mechanisms is complex and  
52 context dependent. We have used a model of trickle infection (multiple low doses of  
53 parasites) to simulate how people/animals get infected in the real world. Using this  
54 model, we have identified the host/parasite interface (the granuloma) within the  
55 intestinal tissue to be key in determining the host's ability to clear worms. Specific gene  
56 expression signatures in granuloma immune cells and the presence/absence of  
57 antibodies within the granuloma are key factors associated with parasite clearance.  
58 Surprisingly, more common identifiers of parasitic worm infections (increased serum  
59 antibody levels and/or generalized immune markers) did not associate with protection.  
60 These novel findings contribute to a better understanding of the mechanisms underlying  
61 effective parasitic worm clearance.

63 **INTRODUCTION**

64

65 Gastrointestinal nematodes are parasites adept at causing chronic recurring infections.

66 Hosts mount a strong immune response to these parasites, essential to control worm

67 burden and host tissue damage. However, the efficacy of the response is dependent on

68 genetics, infection dynamics and environment.

69

70 *Heligmosomoides polygyrus* is an enteric nematode parasite of mice [1],[2]. Ingested

71 larvae encyst in the host intestinal wall and mature into adults that escape into the

72 lumen. Adults remain in the intestinal lumen for the duration of infection. *H. polygyrus*

73 tissue dwelling stages cause the release of alarmins from epithelial cells as they damage

74 the intestinal wall [3]–[5]. Alarmin-activated innate lymphoid cells and Th2 polarized

75 CD4<sup>+</sup> T cells produce Th2 cytokines [6]–[9] which promote innate immune cell influx to

76 the intestine [2],[6],[10]. The accumulation of immune cells is referred to as a

77 granuloma [7],[11],[12]. Increased granuloma size and number are associated with

78 increased resistance to nematodes [13].

79

80 Within the granuloma, the host response focuses on damaging or killing the parasitic

81 nematodes, as well as healing the damage caused by the growing worm (reviewed in

82 [14]). Eliminating tissue stage parasites is thought to rely on antibody dependent cell

83 mediated cytotoxicity (ADCC) by macrophages and eosinophils [7],[15],[16], the main

84 cellular players within the granuloma. Antibodies are key to this process. Resistant

85 strains of mice have been shown to develop faster and more intense parasite specific  
86 antibody responses following *H. polygyrus* infections, as compared to susceptible  
87 strains, where isotypes IgG<sub>1</sub>, IgA and IgE have been linked to worm clearance  
88 [2],[17],[18]. Passive transfer of serum, and specifically IgG<sub>1</sub>, from infected mice results  
89 in decreased adult worm burden and fecundity [19]–[22]. *H. polygyrus* adult numbers  
90 are increased in infected mice lacking IgA [23]. IgG<sub>1</sub> and IgE have also been negatively  
91 correlated with worm survival across different strains of mice [24]–[26].

92  
93 Alternatively activated macrophages (AAMs) isolated from *H. polygyrus*-induced  
94 granulomas have increased surface levels of FcγRs as well as complement receptor  
95 CD11b and surface binding of IgG<sub>1</sub> and IgG<sub>3</sub> [27]. However, the exact mechanisms  
96 responsible for parasite adherence and killing remain controversial. *In vitro* observations  
97 have yet to be validated *in vivo*. For example, the CD11b receptor on bone marrow  
98 derived macrophages can directly bind *H. polygyrus* larvae using complement 3 when  
99 cultured with immune serum. *In vitro*, after adhering to the larvae via the CD11b-C3  
100 interaction [27], FcγR1 on macrophages can interact with parasite bound IgG<sub>2a/c</sub> (but not  
101 IgG<sub>1</sub>) antibodies to immobilize the larvae [28]. However, this binding does not reduce  
102 the infectivity of larvae *in vivo* [27]. In contrast, mice vaccinated with *H. polygyrus*  
103 excretory/secretory products (HES) are protected from chronic infection as a result of  
104 the IgG<sub>1</sub> response [5]. IgG<sub>1</sub> antibodies are thought to bind and neutralize parasite  
105 excretory secretory products, that in unvaccinated mice are able to interfere with the

106 functions of protective innate immune cells [5]. However, passive transfer of purified  
107 IgG<sub>1</sub> did not induce sterile immunity suggesting that other mechanisms are at play [5].  
108 As well as being involved in parasite damage and death, AAMs and eosinophils are both  
109 also involved in host tissue repair [14]. AAMs produce immunoregulatory and wound  
110 healing molecules [29],[30] which promote extracellular matrix (ECM) deposition during  
111 helminth infections [31]–[34]. *H. polygyrus* infections induce Ym1 and RELM- $\alpha$  secretion  
112 from AAMs [2], both linked with the wound healing phenotype [35]. Eosinophils also  
113 produce RELM- $\alpha$  [36], TGF- $\alpha$ , TGF- $\beta$  and fibroblast growth factors [37]–[39]. In addition,  
114 Arginase 1, a marker for AAMs has been found to be essential in both parasite expulsion  
115 and wound healing during *H. polygyrus* infections (9,40). Collagen is a major component  
116 of the ECM and excessive collagen deposition leads to fibrosis and scarring during  
117 chronic helminth infections [41].  
118  
119 Immune responses are not only generated to tissue dwelling parasitic stages but also to  
120 the adults found in the intestinal lumen. The cytokines IL-4 and IL-13 enhance smooth  
121 muscle contractility of the intestine via STAT6 dependent pathways [42] to help  
122 eliminate adult worms [43]–[45]. IL-4, IL-9 and IL-13 also regulate goblet cell hyperplasia  
123 and increase mucus production during gastro-intestinal (GI) nematode infections  
124 [46],[47], which makes it more difficult for adult parasites to coil around intestinal villi.  
125 In addition, RELM- $\beta$  produced by goblet cells interferes with the ability of adult parasites  
126 to feed, thus limiting their numbers [48]. Finally, *H. polygyrus* infections induce

127 polyclonal and parasite specific serum antibody responses, which function to limit adult  
128 female egg production [5],[23],[27],[28].

129

130 Most of the murine studies on helminth infection use a bolus model of infection (one  
131 large dose), with some groups adopting a drug clearance model (bolus infection, drug  
132 clearance, bolus infection) to simulate mass drug administration programs [7],[49].

133 However, under natural conditions, GI nematodes are ubiquitous in the environment  
134 [50] and hosts are constantly coming into contact with them. While many hosts are

135 infected, few have life threatening levels of worms implying immune regulatory

136 mechanisms are at play [5]. Most hosts are unable to clear infection but can limit

137 excessively damaging worm burdens [13]. Hence, we (and others) have set up

138 experimental infection models using trickle infections to study parasite clearance of GI

139 nematodes in a more natural setting [18],[51]–[53]. We use multiple low doses of

140 larvae, given over a specific time period to achieve this.

141

142 *H. polygyrus* trickle infections in genetically resistant and susceptible strains of mice

143 reveal that the frequency of infection is an important determinant of parasite expulsion,

144 where frequently infected mice eliminate worms more rapidly than mice infected with

145 the same total number of larvae but in less frequent doses [53]. The aim of our study

146 was to identify the host protective immune mechanisms underlying these results.

147 Previous studies speculated that improved antibody and innate immune cell responses

148 to tissue dwelling parasites were key elements [18],[53]. We were able to reproduce the

149 data demonstrating that in susceptible mice, trickle infection results in reduced worm  
150 burdens. However, we were also able to show that this reduction was associated with  
151 increased levels of antibodies bound to tissue larvae and a specific gene expression  
152 signature in the granulomas. All other correlates of Th2 immunity measured between  
153 the bolus- and trickle-infected mice were similar including systemic Th2 cytokine  
154 responses and antibody levels, as well as local physiological, mucosal and immunological  
155 responses in the small intestine. Our results highlight the importance of the granuloma  
156 in the host's ability to clear *H. polygyrus* and emphasise the need to study this key tissue  
157 in more depth, rather than using correlates such as general intestinal or systemic  
158 responses.

159

## 160 **MATERIALS AND METHODS**

161

162 *Mice, parasites and antigen*

163

164 Female and male C57Bl/6 mice aged 6-8 weeks (bred and maintained at the animal care  
165 facility, Department of Biological Sciences, University of Calgary or University of  
166 California, Riverside, USA) were used for all experiments. All animal experiments were  
167 approved by the University of Calgary's Life and Environmental Sciences Animal Care  
168 Committee (protocols AC17-0083 and AC17-0240) and the University of California,  
169 Riverside's Institutional Animal Care and Use Committee  
170 (<https://or.ucr.edu/ori/committees/iacuc.aspx>; protocol A-20180023). All protocols for



171 animal use and euthanasia were in accordance with either the Canadian Council for  
172 Animal Care (Canada) or National Institutes of Health (USA) guidelines. Animal studies  
173 are in accordance with the provisions established by the Animal Welfare Act and the  
174 Public Health Services (PHS) Policy on the Humane Care and Use of Laboratory Animals.  
175  
176 Female BALB/c mice and Swiss Webster mice aged 6-8 weeks were purchased from  
177 Charles River Laboratories (Senneville, Quebec). Infected mice were orally gavaged with  
178 200 third stage *Heligmosomoides polygyrus* larvae (maintained in house, original stock  
179 was a gift from Dr. Allen Shostak, University of Alberta, Canada) and euthanized at  
180 either 7, 14, 21 or 28 days post initial infection. Mice were infected according to the  
181 bolus or trickle infection regimes (Fig 1A, 1B & 8A). To avoid differences in counts during  
182 the trickle infections, on day 0, two identical bolus solutions were made up (200  
183 worms/100ul). One was used to infect the bolus infected mice and one was used for the  
184 trickle infected mice and diluted as necessary according to the number of trickle doses.  
185  
186 *H. polygyrus* antigen was prepared by collecting live adult worms from 14-day infected  
187 mice using modified Baerman's apparatus. Worms were washed multiple times and  
188 homogenized in PBS using a glass homogenizer. The resulting solution was centrifuged  
189 (13, 000 g, 10 minutes, 4°C) and the supernatant filtered (0.2µm filter, Nalgene). The  
190 protein concentration was calculated using the Bradford assay. The antigen was stored  
191 at 15 mg/ml at -80°C.

192

193 *Adult worm burden and granuloma number*

194

195 Small intestines of infected mice were harvested and opened longitudinally. The number  
196 of adult worms present in the intestinal lumen and of granulomas present along the  
197 length of the small intestine were counted using a dissection microscope.

198

199 *Transit time*

200

201 Gastrointestinal transit time was measured one day prior to euthanasia. Mice were fasted  
202 for 6 hours and 200  $\mu$ l of 5% Evans blue (Sigma) in 5% gum arabic (ACROS organics) was  
203 orally gavaged using a ball tip 20 gauge 1.5", 2.25mm curved animal feeding needle. Each  
204 mouse was labelled, with the time of dye administration recorded. Mice were transferred  
205 to clean empty cages and the time to pass the first blue fecal pellet was recorded.  
206 Gastrointestinal transit time was calculated for each mouse.

207

208 *Cell isolation and in vitro re-stimulation assay*

209

210 MLN and SPL were mechanically dissociated into single cell suspensions. Cells were  
211 counted using a Beckman-Coulter ViCell XR. MLN and SPL were cultured at  $1 \times 10^6$   
212 cells/ml for 48 hours in RPMI medium, 10% FCS, 1% L-glutamine, 1% penicillin/  
213 streptomycin (supplemented RPMI 1640) in the presence of 10  $\mu$ g/ml *H. polygyrus*

214 antigen or 2 µg/ml concanavalin A (Sigma) at 37 °C with 5% CO<sub>2</sub>. Supernatants were  
215 collected for cytokine measurements. Measurements for antigen specific production  
216 were not included in the analysis unless cytokine production was observed in the wells  
217 with concanavalin A stimulation.

218

219 *Serum*

220

221 Blood samples were collected using a terminal cardiac bleed. Blood was left to clot for  
222 30 minutes and then centrifuged twice at 11, 000 g at 4°C for 10 minutes. Serum was  
223 collected and used either fresh or stored at -80°C.

224

225 *Intestinal Tissue homogenates*

226

227 Small intestines were opened longitudinally and washed with PBS to remove luminal  
228 content. The mucosal surface was identified under a dissecting microscope. The mucosal  
229 surface (with its mucus) was gently scraped using a glass slide. Scrapings were weighed,  
230 added to 500 µl lysis buffer (10 µM tris HCl, 0.025% sodium azide, 1% tween 80, 0.02%  
231 phenylmethylsulfonyl fluoride) with one complete protease inhibitor tablet (Roche  
232 diagnostics GmbH, Germany) and homogenized using a bead beater (40 seconds at  
233 speed 6 using the Fast-prep-24 bead beater, MP biomedical). The homogenate was  
234 centrifuged at 11, 000 g at 4°C for one hour. Supernatants were collected and used fresh  
235 or stored at -80°C.

236

237 *ELISAs*

238

239 Cytokines in serum and intestinal tissue homogenates were measured by ELISA  
240 according to manufacturer's guidelines (R & D systems, DY404 (IL-4), DY413 (IL-13),  
241 DY594 (IL-21). Total IgE (BD, 555248) and IgA (capture antibody, BD, 556969, detection  
242 antibody, BD, 556978) levels were measured by ELISA according to manufacturer's  
243 instructions.

244

245 Antigen specific antibody responses were also measured by ELISA. ELISA microplates  
246 were coated with 10 µg/ml *H. polygyrus* antigen in carbonate buffer (0.1mM NaHCO<sub>3</sub>,  
247 pH 9.6), overnight at 4°C. Plates were blocked with 2% BSA in TBS/0.05% tween 20 for 2  
248 hours at 37°C. Sera were diluted in TBS Tween and added to wells overnight at 4°C.  
249 Antigen- specific IgG<sub>1</sub> was detected with HRP-conjugated corresponding detection  
250 antibodies (anti-IgG<sub>1</sub> (BD, 553441) with TMB peroxidase substrate (T3405, Sigma). The  
251 reaction was stopped using 1M H<sub>2</sub>SO<sub>4</sub> solution and the colour change was read at  
252 450nm.

253

254 *Antibody detection in the granuloma*

255

256 Consecutive formalin fixed paraffin embedded mouse small intestinal sections were  
257 deparaffinized using two, five-minute xylene washes, rehydrated by washing in 95%

258 ethanol and 70% ethanol for 5 minutes. Slides were incubated in 2% sodium borohydride  
259 (VWR, BDH4604) in PBS for 40 minutes at RT to remove auto fluorescence. Antigens were  
260 retrieved using 2.5% trypsin (Thermo scientific, 15090046) in 0.1% HEPES buffer,  
261 incubated at 37 °C for 25 minutes. Blocking steps were performed following PBS washes.  
262 All samples were blocked with starting block (Thermo Scientific, 37578) for 1 hour at RT  
263 and rat/rabbit/goat serum for 30 minutes at RT. Following blocking steps, slides were  
264 incubated with rat anti-mouse IgG<sub>1</sub> (BD, 562026), IgE conjugated to FITC (BD, 553415) or  
265 rat anti-mouse IgA (BD, 559354) overnight at 4°C. For IgG<sub>2c</sub> staining, slides were incubated  
266 overnight at 4°C with unconjugated rabbit anti-mouse IgG<sub>2c</sub> antibody (Invitrogen, SA5-  
267 10221) followed by incubation with goat anti-rabbit IgG conjugated to Alexafluor488  
268 (ImmunoResearch Laboratories, 111-545-003) for 2 hours at RT. Slides were washed in  
269 PBS for 15 minutes and mounted with Fluoroshield with DAPI (Sigma, F56057). Images  
270 were acquired using Thorlabs Tide whole-slide scanning microscope, x20 objective and  
271 analysed using Fiji 5.59.05 software.

272

### 273 *Nanostring nCounter gene expression assay*

274

275 Intestinal tissue from naïve mice or dissected pooled granulomas from infected mice were  
276 snap frozen in liquid nitrogen and RNA was isolated using phenol-chloroform extraction  
277 (TRIZOL, Sigma). RNA was quantified using a nanodrop and 50 ng was used for the Myeloid  
278 Innate Immunity V2 panel (NanoString) according to the manufacturer's guidelines. Gene  
279 expression analysis was conducted in R (1). Gene counts obtained via the nanostring

280 hybridization assay were normalized with NanostringNorm (2) using the negative control  
281 probes, positive control probes and housekeeping genes Eif2b4, Polr1b, and Edc3. Of the  
282 20 housekeeping genes included in the assay Eif2b4, Polr1b, and Edc3 were the only ones  
283 found to have consistent expression among all samples in preliminary comparisons that  
284 used all 20 housekeeping genes for normalization. Therefore Eif2b4, Polr1b, and Edc3  
285 were the only housekeeping genes used for normalization in subsequent analyses. The  
286 normalized counts were then compared using DESeq2 (3) to find differentially expressed  
287 genes in pairwise comparisons between treatment groups. A false discovery rate adjusted  
288 p-value cut off of 0.05 and a fold-change cutoff of 2 were used to identify genes that were  
289 differentially expressed in each pairwise comparison. The data discussed in this  
290 publication have been deposited in NCBI's Gene Expression Omnibus (4) and are  
291 accessible through GEO Series accession number GSExxx (number will be available upon  
292 acceptance).

293

294 *Statistical analysis (except for nanostring results)*

295

296 Mann-Whitney and Kruskal Wallis tests with Dunn's multiple comparisons were used to  
297 assess differences between either two or more experimental groups using GraphPad  
298 Prism.

299

300

301

302

303 **RESULTS**

304

305 ***C57Bl/6 mice develop a resistant phenotype when infected using the trickle regimen***

306

307 Two inbred strains of mice, C57Bl/6 (genetically susceptible) and BALB/c (genetically  
308 resistant) [13] were infected with *H. polygyrus* according to the bolus or trickle adult  
309 infection regimes (Fig. 1A & 1B). When given a bolus infection of 200 worms, BALB/c mice,  
310 being partially resistant to *H. polygyrus*, eliminated the majority of their worms by 14 days  
311 post-infection (mean worm burden of 53, SD +/- 30, Fig. 1C). Worm burdens declined over  
312 time until day 28 post infection, where the average number of worms per mouse was 8.5.  
313 SD +/- 13 (Fig. 1C). In contrast, C57Bl/6 mice being susceptible to *H. polygyrus* harboured  
314 high numbers of adult worms (an approximate mean value of 100 worms per mouse, Fig.  
315 1D) in the intestinal lumen at all time points tested (Fig. 1D left). When infected according  
316 to the trickle protocol, infection dynamics in BALB/c mice were similar to those infected  
317 with the bolus regimen, whereby mice had low burdens at all time points post-infection,  
318 with near complete clearance by day 28 post-infection (Fig. 1C). However, C57Bl/6 mice  
319 infected according to the trickle protocol also eliminated most of the adult worms by 28  
320 days post infection (mean worm burden 11, SD +/- 22, Fig. 1D). This mirrored the BALB/c  
321 mice results (Fig. 1C) but was in stark contrast to the results obtained for C57Bl/6 mice  
322 infected according to the bolus protocol despite similar worm burdens at day 14 post-  
323 infection (bolus: 129, SD +/- 38, trickle: 106, SD +/- 24, Fig. 1D). Administering *H. polygyrus*

324 larvae in low frequent doses to C57Bl/6 mice changed their susceptibility to infection (Fig.  
325 1D).

326

327 ***Systemic IL-4 and IL-13 responses do not differ between bolus and trickle infected mice.***

328

329 *H. polygyrus* clearance has been associated with a strong Th2 response, specifically  
330 increases in IL-4 and IL-13 cytokines [54]–[56]. As the Th2 immune response develops in  
331 response to *H. polygyrus*, MLN (mesenteric lymph nodes) and SPL (spleen) cell numbers  
332 increase [57]. Despite BALB/c mice having higher numbers of cells than C57Bl/6 mice at  
333 all time points in both organs, we found no differences between the trickle and bolus  
334 groups in either strain at any of the time points in either of the organs (Fig. 2A-D, left  
335 panel).

336

337 We measured the levels of the antigen-specific Th2 cytokine production (IL-4 and IL-13)  
338 in both the MLN and SPL as well as in the serum of mice by ELISA. Levels of cytokines  
339 measured in BALB/c mice were in general higher than in C57Bl/6 mice, as has previously  
340 been reported [13],[58],[59]. In BALB/c animals, levels were increased early and remained  
341 elevated over the course of infection for IL-4 in the MLN (increased from day 7, Fig. 2A  
342 middle panel) and the SPL (increased from day 14, Fig. 2C middle panel) and IL-13 in the  
343 MLN (increased from day 14 but decreased by day 28, Fig. 2A right panel) and SPL  
344 (increased from day 7, Fig. 2C right panel). In C57Bl/6 animals, levels were increased early  
345 but decreased by the later time points for IL-4 in the MLN (decreased from day 21, Fig. 2B



346 middle panel) and the SPL (decreased from day 21, Fig. 2D middle panel) and IL-13 in the  
347 MLN (decreased by day 28, Fig. 2B right panel) and SPL (increased over the whole  
348 infection, Fig. 2D right panel). Levels of IL-4 and IL-13 were undetectable in the serum, as  
349 seen by others [60].

350

351 Taken together, we show that despite differences in cytokine levels according to mouse  
352 strain, organ and post-infectious time-point, no differences were detected between bolus  
353 and trickle infected mice in any of the conditions tested (Fig. 2).

354

355 ***Serum antibody levels do not differ between trickle and bolus infected mice.***

356

357 IgE and parasite specific IgG1 have both been shown to increase during primary and  
358 secondary *H. polygyrus* infection [49]. IgG1 has been associated with parasite clearance  
359 [5] while IgE is thought to reduce parasite fecundity [23]. We investigated changes in  
360 serum antibody responses following bolus and trickle infections in both BALB/c and  
361 C57Bl/6 mice over the course of infection.

362

363 Despite an increase in total serum IgE over the course of infection in both mouse strains  
364 (BALB/c maximum levels on day 14 post infection with 559 ng/ml, SD +/- 94 compared to  
365 naïve levels at 68 ng/ml, SD +/- 58 and C57Bl/6 maximum levels on day 21 post-infection  
366 with 624 ng/ml, SD +/- 445 compared to naïve levels of 40 ng/ml, SD +/- 21), there was

367 no difference in levels between bolus- and trickle-infected groups at any post-infection  
368 time point (Fig. 3A & B).

369

370 We also measured an increase in parasite specific IgG1 over time, as has previously been  
371 reported [23]. In BALB/c mice, at both days 21 and 28 post-infection, titers were above  
372  $10^4$  (Fig. 3C), while in C57Bl/6 mice, despite an increase in titers, these remained below  
373  $10^4$  at all time points (Fig. 3D). However, again, no differences were observed between  
374 trickle and bolus infected animals in either strain, at any time point. Also, no detectable  
375 levels of *H. polygyrus* larval or adult parasite antigen specific IgE, IgG2c or IgA were  
376 observed in the serum of bolus- or trickle-infected mice at any post-infection time point.

377

378 ***Local physiological, mucosal and immunological responses in the small intestine are***  
379 ***not responsible for the improved protection observed in trickle-infected C57Bl/6 mice***

380

381 Worm infections result in physiological changes in the small intestine that have been  
382 linked to promoting worm expulsion. These include increased intestinal smooth muscle  
383 contractility [61], and therefore, decreased intestinal transit time, as well as increased  
384 mucus production. We found that transit time (as measured by the time to pass dyed  
385 gavaged material) was reduced in infected C57Bl/6 animals by day 7 post infection, in  
386 both trickle and bolus infected groups by approximately 20% (Fig. 4A, left panel).  
387 However, this decrease was only apparent in trickle infected animals by day 21 post-  
388 infection (approximate 12% difference between the trickle- and bolus-infected groups).

389 At day 28 post-infection, the difference between bolus- and trickle-infected groups  
390 disappeared (approximate 3% difference between the trickle and bolus infected  
391 groups). We also measured mucus production indirectly through intestinal tissue  
392 weights. Infected mice had significantly higher intestinal tissue weights at 7 days  
393 (approximately 1.5 times naïve weights in both trickle- and bolus-infected mice) and 21  
394 days (approximately 2.5 times naïve weights in both trickle- and bolus-infected mice)  
395 compared to naïve animals. Levels had returned to naïve levels by 28 days post-infection  
396 (Fig. 4A, right panel). There was no difference between the bolus- and trickle- infected  
397 groups.

398

399 Next, we measured the levels of the Th2 cytokines IL-4 and IL-13 by ELISA in intestinal  
400 tissue, since both these cytokines have been associated with stimulating increased  
401 mucus production in the small intestine [62]. While levels of IL-13 were increased at day  
402 21 and 28 post-infection, they were not different between the trickle- and bolus-  
403 infected groups (naïve: mean level 125 pg/ml, SD +/- 141, day 21: bolus mean level 558  
404 pg/ml, SD +/- 268, trickle mean level 309 pg/ml, SD +/- 231, day 28: bolus mean level  
405 363 pg/ml, SD +/- 254, trickle mean level 366 pg/ml, SD +/- 216, Fig. 4B, right panel).  
406 Intestinal IL-4 levels were not increased at any point (approximately 40pg/ml) apart  
407 from at day 21, where they were significantly increased in the bolus-infected group (132  
408 pg/ml, SD +/- 85) and different to the trickle-infected group. No levels of IL-5, IL-9 or IL-  
409 10 were detectable in intestinal tissue from control or infected mice.

410

411 Mucosal IgA levels, regulated by the cytokine IL-21 [63], are also increased in the  
412 presence of intestinal dwelling parasites [64]. We therefore measured IgA and IL-21  
413 levels in the small intestine (Fig. 4C). Intestinal IgA levels did not differ between bolus-  
414 or trickle-infected mice over the course of infection (Fig. 4C, right panel). Interestingly,  
415 levels in both infection groups were similar to naïve levels (1292 pg/ml, SD +/- 924) at  
416 day 7 and 21 post-infection, but decreased at day 28 post-infection (bolus: 832 pg/ml,  
417 SD +/- 754; trickle: 555 pg/ml, SD +/- 93). Contrastingly, IL-21 levels were increased at  
418 day 21 and 28 post-infection (from 98 pg/ml, SD +/- 84 in naïve animals to  
419 approximately 950 pg/ml in infected animals, Fig. 4C, left panel). Like IgA levels, they  
420 were not different between trickle- and bolus-infected animals.

421

422 In summary, at the level of the small intestine, very few differences were observed  
423 between bolus- and trickle-infected animals, and these differences were not associated  
424 with reduced worm burden.

425

426 ***Unlike bolus infection, trickle infection results in stable granuloma numbers over the***  
427 ***course of infection in C56BL/6 mice.***

428

429 Since few differences were recorded between trickle- and bolus-infected mice in the  
430 small intestine, we focused on the host/parasite interface, the intestinal granuloma.

431

432 Granulomas are a characteristic response to intestinal roundworms [14]. In response to  
433 *H. polygyrus.*, they are round, opaque hard structures protruding from the small  
434 intestinal wall, easily identifiable and quantifiable using a dissection microscope (Fig.  
435 5A). We measured these structures in both C56Bl/6 and BALB/c mice over the course of  
436 infection (days 7, 14 , 21 and 28 days post-infection). We found that, BALB/c mice, both  
437 trickle- and bolus-infected, had consistently high granuloma numbers over the first  
438 three time points (granuloma numbers >45, Fig. 5B). At day 28 post-infection, numbers  
439 dropped below this. In C57Bl/6 mice, a similar pattern was observed for the bolus-  
440 infected mice: at days 7 and 14, granuloma numbers were high, and >45, at days 21 and  
441 28, granuloma numbers were reduced to ~17 (Fig. 5C). However, in trickle-infected  
442 C57Bl/6 mice, granulomas remained > 45 for the entire time course (Fig. 5C).

443

444 ***In C56Bl/6 mice, granulomas from bolus and trickle- infected mice have different***  
445 ***patterns of gene expression.***

446

447 Since protective immune responses to *H. polygyrus* infection are thought to be localized  
448 in the granuloma (92), we isolated all granulomas along the small intestine of bolus- and  
449 trickle-infected C57Bl/6 mice at days 7 and 21 post-infection. To identify the granuloma  
450 transcriptional profiles, we extracted the mRNA and quantified transcript levels using  
451 the nanostring myeloid innate immunity V2 panel. For naïve mice that do not have any  
452 granulomas along their small intestine, we harvested intestinal tissue from similar areas  
453 to those harvested in infected mice.

454 Using principal component (PC) analysis, we found that infection is responsible for the  
455 largest differences observed between the three groups (naïve, bolus-infected and  
456 trickle-infected) at both post-infection time points. Naïve and infected groups clustered  
457 distantly from each other, with infection explaining 62.1% of the variation (PC1) at day 7  
458 post-infection and 90.5% of the variation (PC1) at day 21 (Fig. 6). Along the second  
459 principal component, granulomas from day 21 (but not day 7) infected mice clustered  
460 separately according to their infection mode (trickle or bolus, Fig. 6).

461

462 We found a number of genes that were differentially expressed between naïve  
463 intestinal tissue (naïve group) and granuloma tissue (infected groups trickle and/or  
464 bolus) at day 7 and day 21 post-infection. At day 7, a total of 40 genes were upregulated  
465 in infected (NvT and NvB) vs. naïve animals: 9 are involved in cell migration, 11 in  
466 chemokine signalling, 6 in ECM and 5 in lymphocyte activation (Fig. 7A, Fig. S1). Over  
467 half of the upregulated genes (57%, 23/40) were also found to be upregulated at day 21  
468 post-infection. Many of the identified differentially expressed (DE) genes have already  
469 been implicated in the immune response to helminths, such as *Retnla*, *Arg1*, *Chil3*, *Chil4*  
470 and *Retlnb* [48],[65]. Fifteen of the 40 genes were highly upregulated (more than 16-  
471 fold); they are mostly involved in chemokine signaling, likely attracting macrophages  
472 and eosinophils to the granuloma. A total of 46 genes were downregulated in infected  
473 vs. naïve animals (NvT and NvB) at day 7 post-infection: 9 involved in cytokine signaling,  
474 11 in growth factors, 8 in ECM, 6 in metabolism and 9 in lymphocyte activation. Seven of  
475 these genes (~15%) were also downregulated at day 21 post-infection. Twenty four of

476 the 46 genes were highly downregulated, and were associated with all functional  
477 categories. At day 21 post-infection, 75 genes were upregulated in infected vs. naïve  
478 (NvT and NvB) (Fig. 8A, Fig. S2): 12 involved in cell migration, 12 in chemokine signalling,  
479 17 in ECM, 14 as growth factors, 10 in metabolism and 15 in lymphocyte activation.  
480 Forty-one of these 75 genes were highly upregulated; these are involved in attracting  
481 macrophages and eosinophils (e.g. *chil4*, *chil3*, *Serpine 1*, *ccl7*, *cxcl3*, *cxcr4*), as well as  
482 ECM remodelling (e.g. *mmp12*, *col1a2*, *cma1*, *Arg1*). Twelve genes were downregulated  
483 in infected vs. naïve (NvT and NvB): 2 involved in cytokine signalling, 2 in growth factors,  
484 2 in pathogen response and 3 in metabolism. None were highly downregulated: the  
485 most downregulated gene was *nos2* at ~7 times.

486

487 When looking at differentially expressed genes between trickle- and bolus-infected  
488 animals, we also found differences at both time points (day 7 and day 21). At day 7 post-  
489 infection, 10 genes were upregulated in trickle (vs. bolus) infected animals (Fig. 7A &  
490 7B): 3 are TLR related, 3 are growth factors and 3 are involved in cytokine signalling. Of  
491 the 10 DE genes, 6 are highly upregulated: *Selp*, *Tlr6*, *Bcl2*, *Tlr12*, *Flrt2*, *Il3ra* and one is  
492 also upregulated at day 21: *cc/3*. At day 21 post-infection, 24 genes were upregulated in  
493 trickle (vs. bolus, Fig. 8A & 8B): 4 are TLR related, 7 are growth factors and 8 are  
494 involved in cytokine signaling. Of the 24 DE genes, 3 were highly upregulated: *Adamts4*  
495 involved in ECM, *Osm* involved in cytokine production and *Ndc80* involved in cell  
496 division. Twelve genes were upregulated in bolus (vs. trickle) at day 21 post-infection  
497 compared to none at day 7. Three of these genes were growth factors and three

498 involved in cytokine signaling. No genes were highly upregulated, all were expressed  
499 below 7-fold and were associated with many different functions. The three most highly  
500 upregulated in the bolus infected animals (*cxcr3*, *cxcr4*, *ptgdr*) are involved in eosinophil  
501 recruitment and Th1 immunity.

502

503 Despite having many genes commonly expressed between the granulomas of trickle-  
504 and bolus-infected mice, different gene expression signatures were identified between  
505 these two modes of infection. Of the genes previously associated with immune  
506 responses to helminths, granulomas from day 21 trickle-infected animals had higher  
507 levels of *Il13* (associated with worm expulsion [47],[54]), *S100A8* and *S100A9*  
508 (associated with neutrophil recruitment [66]), and *Retlnb* (associated with worm death  
509 [48]), as well as *ccl3* and *cxcl5* (inflammatory chemokines) expression. Surprisingly, we  
510 found no differences between the trickle and bolus infections in any genes linked to Fc  
511 receptor signalling, despite the importance of antibody-mediated worm killing by  
512 macrophages and/or eosinophils within granulomas [14].

513

514 ***IgG1 is the only antibody subtype to accumulate around encysted larvae in trickle***  
515 ***infected C57Bl/6 mice.***

516

517 The ability to immobilize and/or kill parasitic worm larvae has been linked to antibody-  
518 mediated binding by myeloid cells in the granuloma [14]. IgG1, IgG2c, IgE and IgA  
519 antibody subtypes have all been linked to larval binding and/or damage to varying



520 degrees. Since we found no differences in the expression of Fc receptor signalling genes  
521 within the granuloma between bolus and trickle-infected groups, we measured the  
522 accumulation of IgG1, IgG2c, IgE and IgA antibodies using immunofluorescence, both  
523 within the intestine and focusing on the host parasite interface within the granulomas  
524 (Fig. 9-10). First, we found that high levels of IgG1 in the serum at day 21 post-infection  
525 (Fig. 3D) correlated with the presence of IgG1 in granulomas in both bolus- and trickle-  
526 infected mice (Fig. S3A). At day 7, where antigen specific serum IgG1 could not be  
527 detected (Fig. 3D), IgG1 levels were minimal and/or absent (Fig. S3B).

528

529 To study the host/parasite interface, we set up a trickle (larvae) model (Fig. 9A), in  
530 which granulomas containing larvae (acute granulomas) and granulomas where larvae  
531 had either escaped or been killed (chronic granulomas) could be observed. Using this  
532 model, we found a high concentration of IgG1 at the host parasite interface at both day  
533 14 and day 21 (Fig. 9B) post-infection in acute granulomas. However, in both trickle and  
534 bolus infected animals, levels of IgG1 were similar in chronic granulomas (Fig. 9C). We  
535 could not detect any IgG2c, IgE or IgA within acute granulomas of trickle (larvae)  
536 infected mice (Fig. 10A). This was despite observing IgG2c in intestinal tissue infected by  
537 *C. rodentium* (Fig. S4), IgE in the lamina propria of infected mice (Fig. 10B) and IgA in the  
538 lamina propria and Peyer's patches of infected mice (Fig. 10C).

539

540 Overall, our data show that bolus and trickle infection result in similar systemic and  
541 tissue-wide immune responses. However, granuloma formation is distinct between the  
542 two types of infection, and correlate with different resistant phenotypes.

543

## 544 **DISCUSSION**

545 The formation of granulomas around tissue encysted *H. polygyrus* worms has been  
546 associated with resistance to infection [13]. The innate cells of the granuloma are  
547 thought to damage/kill worms in conjunction with antibodies and complement  
548 components [18],[27],[28]. We and others [13],[67] have shown that resistant BALB/c  
549 mice have more granulomas (Fig. 5) as well as higher levels of Th2 cytokines (Fig. 2) and  
550 parasite specific antibodies (Fig. 3) compared to susceptible C57Bl/6 mice. These  
551 differences are thought to contribute to the BALB/c resistance phenotype.

552 Using our trickle model, we observed a resistance phenotype in the C57Bl/6 mice as  
553 opposed to the susceptible phenotype of bolus infected animals (Fig. 1). The improved  
554 immune response we observed is likely due to the continuous stimulation of the host  
555 immune system by multiple low doses of larvae resulting in a greater number of more  
556 effective granulomas (better responsive myeloid cells and the presence of IgG1  
557 antibodies, Fig. 8 & 9) and ultimately fewer adult worms (Fig. 1). Unlike differences  
558 observed between resistant BALB/c and susceptible C57Bl/6 mice, we found no  
559 significant differences between the systemic (serum antibody and spleen/MLN cytokine  
560 response, Fig. 2 & 3) or tissue-wide (intestinal tissue physiological, cytokine and  
561 antibody responses, Fig. 4) immune responses of bolus and trickle infected C57Bl/6

562 mice. Only when studying the granulomas themselves, at the host parasite interface,  
563 were important differences observed (Fig. 8 & 9).  
564  
565 Granulomas are made up of myeloid cells (mainly alternatively activated macrophages  
566 and eosinophils) and CD4<sup>+</sup> T cells [7],[12] that accumulate around tissue encysted  
567 worms and immobilize them. As expected [14], we identified increased gene expression  
568 linked to myeloid cell recruitment, Th2 immunity and ECM deposition in granulomas  
569 from both trickle and bolus infected groups, at both time points (Fig. 7 & 8).  
570 Overall, the increased levels of myeloid cell chemotactic gene expression within  
571 granulomas at day 7 in both bolus and trickle infections highlights the strong response  
572 to the tissue dwelling phase of the parasite. Ten of the highly upregulated genes at day  
573 7 post-infection (NvT and NvB) have been previously associated with immune responses  
574 to helminth infections. And at day 21 post-infection, many of these same genes  
575 remained upregulated, with an increase in the expression of genes related to ECM  
576 remodelling (Fig. S1 & S2). Granulomas are novel structures created around tissue  
577 dwelling worms. They are not observed in naïve animals (Fig. 5A). As such, we observed  
578 the increased expression of genes associated with collagen production. At day 7 post-  
579 infection, *col1a2* was upregulated with infection (NvT and NvB) as seen in other  
580 helminth infections [68],[69]. At day 21 post-infection, *Col3a1*, *Col4a1* and *Col15a1* were  
581 also upregulated. This is the first time a direct involvement of type III, type IV and type  
582 XV alpha 1 collagens have been linked to wound healing in an intestinal parasitic  
583 infection.

584 In the bolus-infected mice at day 7 post-infection, a number of genes were  
585 downregulated compared to trickle-infected animals (Fig. 7B). These genes are  
586 associated with growth factors, as well as TLR and cytokine signalling, in dendritic cells.  
587 This could be attributed to the initial parasite dose. Bolus-infected animals were given a  
588 dose of 200 worms, known to strongly downregulate the immune response as early as  
589 day 7 in the small intestine [70]. The trickle-infected animals received the same total  
590 dose, but split over 3 different time points which may have reduced the impact of the  
591 parasite. Interestingly, one of the downregulated genes on day 7 post-infection, *Bcl2*  
592 (decreased by 33 fold compared to trickle-infected mice), has previously been  
593 associated with *H. polygyrus* infection. It was found to be increased in CD4+ T cells in the  
594 MLN, 2 weeks post-infection [71]. Similarly, we also found it was increased ~4 fold at  
595 day 21 post-infection in the granulomas of both bolus- and trickle-infected animals (Fig.  
596 S2).

597 At day 21, the two most highly expressed genes in the trickle-infected mice are involved  
598 in tissue remodelling (*Adamts4*: 124 fold, *Osm*: 49 fold, [72]). *Adamts12* (7 fold increase,  
599 (5)), *Adamts3* (6 fold increase, (6)), *Hdac5* (3 fold increase, [73]), *Smad2* (2 fold increase  
600 [74]), and *Socs 3* (2 fold increase, [75]), were also upregulated and are involved in tissue  
601 remodelling. The expression for all these genes is significantly higher compared to both  
602 day 21 and day 7 bolus-infected mice. As such, the difference observed is not due to the  
603 difference in 'age' of the granulomas, with the bolus day 21 granulomas being 'older'  
604 than the trickle day 21 granulomas. Interestingly, to our knowledge, the 2 most highly  
605 expressed genes (*Adamts4* and *Osm*) have not been associated with helminth infection

606 before. However, *Osm* is thought to stimulate *adamts4* mediated degradation of the  
607 ECM [72], which may be an important process in the regulation of the granuloma  
608 structure.

609

610 We also found genes involved in the Th2 response upregulated in the day 21 post-  
611 infection trickle-infected animals. *Il-13* was increased 10-fold in the trickle- vs. bolus-  
612 infected animals. While *Igf1* was increased 4-fold. *Igf1* is secreted by alternatively  
613 activated macrophages, and has been shown to promote worm expulsion. In  
614 *Nippostrongylus brasiliensis* infected mice, animals lacking *Igf1* had higher worm counts  
615 than their wildtype counterparts [76].

616

617 Granulomas from trickle-infected animals have a different transcriptomic signature to  
618 bolus-infected animals, with a stronger Th2 and wound healing response. However,  
619 worm killing depends not only on activated myeloid cells, but also antibodies.

620 Antibodies are thought to be the bridge that allows granuloma granulocytes to  
621 kill/damage trapped parasites [14]. Antibodies are known to be required for protective  
622 immunity against *H. polygyrus* as B cell deficient mice [80] and mice lacking antibody  
623 production ( $J_H$  or AID deficient, [23]), fail to eliminate adult worms. Of all the antibody  
624 isotypes, only IgG<sub>1</sub> from immune mice has been shown to reduce adult worm burdens  
625 when administered alone [20], and protect mice from re-infection [22]. Passive transfer  
626 of IgG<sub>1</sub> resulted in stunted worms, and *in vitro* assays demonstrated that IgG<sub>1</sub> promotes  
627 peritoneal exudate cell attachment to the larval surface [20]. We found that IgG<sub>1</sub> was

628 the only detectable antibody isotype observed within the granulomas of infected mice  
629 (Fig. 9 & 10). No IgE or IgA accumulation was detected (Fig. 10A), despite their presence  
630 in the intestinal tissue (Fig. 10B & 10C), serum (Fig. 3B) and intestinal scrapings (Fig. 4C).  
631 Interestingly, others have shown that while IgE was found to play no role in parasite  
632 clearance in *H. polygyrus* infected animals, IgA contributes to limiting worm  
633 development [23]. This was done using IgA deficient animals, and, unlike in our study,  
634 levels of antibodies within granulomas were not assessed.

635  
636 Trickle and bolus infected mice had similar levels of serum IgG<sub>1</sub> (Fig. 3) and of IgG<sub>1</sub>  
637 accumulation in their chronic granulomas (containing no tissue dwelling phases) at day  
638 21 post-infection (SupFig. 3A). At this time point, tissue encysted worms had either  
639 escaped or been killed and digested within the granulomas in both infected groups. To  
640 detect whether IgG<sub>1</sub> was playing a role in damaging/killing incoming worms in the trickle  
641 model (as has been suggested by [53]), we examined granulomas earlier (3/4 days as  
642 opposed to 10 days) after the last trickle dose in order to observe tissue dwelling worms  
643 within granulomas (Fig. 9A). In the granulomas containing worms, IgG<sub>1</sub> was  
644 concentrated around the parasites (Fig. 8C). This observation helps explain how  
645 antibodies play a role in worm clearance. Two weeks following infection, both bolus-  
646 and trickle-infected mice produce a strong parasite specific IgG<sub>1</sub> response (high serum  
647 titers, Fig. 3D). However, IgG<sub>1</sub> antibodies can only play a role in ADCC and direct parasite  
648 killing/damage in trickle-infected mice when tissue encysted worms and IgG<sub>1</sub> are  
649 present simultaneously in the granuloma. In bolus-infected animals, when high parasite

650 specific IgG<sub>1</sub> titers develop after two weeks of infection, larvae have already developed  
651 into adults and escaped from the granulomas into the intestinal lumen.

652

653 While the nanostring data obtained offer exciting new avenues of research into the  
654 regulation of granulomas, our study has some limitations. It is difficult to compare data  
655 from day 7 and day 21 post-infection with accuracy since they were obtained from mice  
656 of different sexes. Also, variation within groups was observed. Mouse 2 from the trickle  
657 group had much reduced gene expression than the other trickle-infected animals, which  
658 could in part be due to the low number of granulomas obtained from this animal.  
659 Finally, it would be interesting to study gene expression profiles of acute/chronic  
660 granulomas with/without tissue encysted worms from trickle/bolus infected mice using  
661 single cell RNA sequencing to provide new and valuable details at a cellular level. This  
662 would allow the differentiation of genes that are important during acute and chronic  
663 stages of infection, and help identify other mediators involved in antibody accumulation  
664 and ADCC as well as wound healing/fibrosis within the granulomas during infection.

665

## 666 **ACKNOWLEDGEMENTS**

667 We wish to thank Drs. Vuk Cerovic and Simon Hirota for insightful comments. This works  
668 was funded through Dr Finney's grants from the Canadian Foundation for Innovation and  
669 the Natural Sciences and Engineering Research Council of Canada (NSERC), Dr Nair's grant  
670 from the National Institutes of Health/NIAID (NIH R01AI153195) as well as scholarships  
671 for Drs Anupama Ariyaratne (NSERC Create in Host Parasite Interactions, UCalgary FGS

672 International Research Excellence Award and the Burroughs Wellcome Fund Travel

673 Award), Stephen Pollo (NSERC), Mayara Luzzi (Mitacs Globalink), Joel Bowron (NSERC),

674 Edina Szabo (UCalgary Eyes High).

675



677 **References**

- 678 1. **Johnston CJC, Robertson E, Harcus Y, Grainger JR, Coakley G, Smyth DJ, McSorley HJ,**  
679 **et al.** Cultivation of *Heligmosomoides polygyrus*: an immunomodulatory nematode  
680 parasite and its secreted products. *J. Vis. Exp.* 2015:e52412.DOI: 10.3791/52412.
- 681 2. **Reynolds L a., Filbey KJ, Maizels RM.** Immunity to the model intestinal helminth  
682 parasite *Heligmosomoides polygyrus*. *Semin. Immunopathol.* 2012; **34**:829–846.DOI:  
683 10.1007/s00281-012-0347-3.
- 684 3. **Humphreys NE, Xu D, Hepworth MR, Liew FY, Grecis RK.** IL-33, a potent inducer of  
685 adaptive immunity to intestinal nematodes. *J. Immunol.* 2008; **180**:2443–2449.DOI:  
686 10.4049/jimmunol.180.4.2443.
- 687 4. **Muzio M, Bosisio D, Polentarutti N, D’amico G, Stoppacciaro A, Mancinelli R, van’t**  
688 **Veer C, et al.** Differential expression and regulation of toll-like receptors (TLR) in human  
689 leukocytes: selective expression of TLR3 in dendritic cells. *J. Immunol.* 2000; **164**:5998–  
690 6004.DOI: 10.4049/jimmunol.164.11.5998.
- 691 5. **Hewitson JP, Filbey KJ, Esser-von Bieren J, Camberis M, Schwartz C, Murray J,**  
692 **Reynolds LA, et al.** Concerted activity of IgG1 antibodies and IL-4/IL-25-dependent  
693 effector cells trap helminth larvae in the tissues following vaccination with defined  
694 secreted antigens, providing sterile immunity to challenge infection. *PLoS Pathog.* 2015;  
695 **11**:1–22.DOI: 10.1371/journal.ppat.1004676.
- 696 6. **Vella AT, Hulsebosch MD, Pearce EJ.** *Schistosoma mansoni* eggs induce antigen-  
697 responsive CD44-hi T helper 2 cells and IL-4-secreting CD44-lo cells. Potential for T  
698 helper 2 subset differentiation is evident at the precursor level. *J. Immunol.* 1992;

699 **14:1714–1722.**

700 **7. Anthony RM, Urban JF, Alem F, Hamed H a, Rozo CT, Boucher J-L, Van Rooijen N, et**

701 **al.** Memory T(H)2 cells induce alternatively activated macrophages to mediate

702 protection against nematode parasites. *Nat. Med.* 2006; **12**:955–60.DOI:

703 10.1038/nm1451.

704 **8. Hewitson J, Murray J, Filbey K, Smith KA, Maizels RM, Hewitson JP, Murray J, et al.**

705 Immune modulation and modulators in *Heligmosomoides polygyrus* infection. *Exp.*

706 *Parasitol.* 2011; **132**:76–89.DOI: 10.1016/j.exppara.2011.08.011.

707 **9. King IL, Mohrs K, Mohrs M.** A nonredundant role for IL-21 receptor signaling in

708 plasma cell differentiation and protective type 2 immunity against gastrointestinal

709 helminth infection. *J. Immunol.* 2010; **185**:6138–6145.DOI: 10.4049/jimmunol.1001703.

710 **10. Patnode ML, Bando JK, Krummel MF, Locksley RM, Rosen SD.** Leukotriene B 4

711 amplifies eosinophil accumulation in response to nematodes. *J. Exp. Med.* 2014;

712 **211**:1281–1288.DOI: 10.1084/jem.20132336.

713 **11. Pearce EJ, Macdonald AS.** The immunobiology of schistosomiasis. *Nat. Rev.*

714 *Immunol.* 2002; **2**:499–511.DOI: 10.1038/nri843.

715 **12. Morimoto M, Morimoto M, Xiao S, Anthony RM, Star RA, Urban JF, Gause C, et al.**

716 Peripheral CD4 T cells rapidly accumulate at the host:parasite interface during an

717 inflammatory Th2 memory response. *J. Immunol.* 2004; **172**:2424–2430.DOI:

718 10.4049/jimmunol.172.4.2424.

719 **13. Filbey KJ, Grainger JR, Smith KA, Boon L, van Rooijen N, Marcus Y, Jenkins S, et al.**

720 Innate and adaptive type 2 immune cell responses in genetically controlled resistance to

- 721 intestinal helminth infection. *Immunol. Cell Biol.* 2014; **92**:436–48.
- 722 14. **Ariyaratne A, Finney CAM.** Eosinophils and macrophages within the Th2-induced  
723 granuloma: Balancing killing and healing in a tight space. *Infect. Immun.* 2019;  
724 **87**:e00127-19.
- 725 15. **Wilson MS, Mentink-Kane MM, Pesce JT, Ramalingam TR, Thompson R, Wynn TA.**  
726 Immunopathology of schistosomiasis. *Immunol. Cell Biol.* 2007; **85**:148–154.DOI:  
727 10.1038/sj.icb.7100014.
- 728 16. **Hesse M, Modolell M, La Flamme AC, Schito M, Fuentes JM, Cheever AW, Pearce**  
729 **EJ, et al.** Differential regulation of nitric oxide synthase-2 and arginase-1 by type 1/type  
730 2 cytokines in vivo: granulomatous pathology is shaped by the pattern of L-arginine  
731 metabolism. *J. Immunol.* 2001; **167**:6533–6544.
- 732 17. **Ben-Smith a., Wahid FN, Lammas D a., Behnke JM.** The relationship between  
733 circulating and intestinal *Heligmosomoides polygyrus*-specific IgG1 and IgA and  
734 resistance to primary infection. *Parasite Immunol.* 1999; **21**:383–395.DOI:  
735 10.1046/j.1365-3024.1999.00236.x.
- 736 18. **Behnke JM, Lowe A, Clifford S, Wakelin D.** Cellular and serological responses in  
737 resistant and susceptible mice exposed to repeated infection with *Heligmosomoides*  
738 *polygyrus bakeri*. *Parasite Immunol.* 2003; **25**:333–340.DOI: 10.1046/j.1365-  
739 3024.2003.00639.x.
- 740 19. **Dobson C.** Passive transfer of immunity with serum in mice infected with  
741 *Nematospiroides dubius*: influence of quality and quantity of immune serum. *Int. J.*  
742 *Parasitol.* 1982; **12**:207–213.DOI: 10.1016/0020-7519(82)90018-2.

- 743 20. **Pritchard DI, Williams DJ, Behnke JM, Lee TD.** The role of IgG1  
744 hypergammaglobulinaemia in immunity to the gastrointestinal nematode  
745 *Nematospiroides dubius*. The immunochemical purification, antigen-specificity and in  
746 vivo anti-parasite effect of IgG1 from immune serum. *Immunology*. 1983; **49**:353–365.
- 747 21. **Pritchard DI, Behnke JM, Williams DJ.** Primary infection sera and IgG1 do not block  
748 host-protective immunity to *Nematospiroides dubius*. *Immunology*. 1984; **51**:73–81.
- 749 22. **Williams DJ, Behnke JM.** Host protective antibodies and serum immunoglobulin  
750 isotypes in mice chronically infected or repeatedly immunized with the nematode  
751 parasite *Nematospiroides dubius*. *Immunology*. 1983; **48**:37–47.
- 752 23. **McCoy KD, Stoel M, Stettler R, Merky P, Fink K, Senn BM, Schaer C, et al.** Polyclonal  
753 and Specific Antibodies Mediate Protective Immunity against Enteric Helminth Infection.  
754 *Cell Host Microbe*. 2008; **4**:362–373. Available at:  
755 <https://linkinghub.elsevier.com/retrieve/pii/S1931312808002941>.DOI:  
756 10.1016/j.chom.2008.08.014.
- 757 24. **Ben-Smith A, Lammas DA, Behnke JM.** The relative involvement of Th1 and Th2  
758 associated immune responses in the expulsion of a primary infection of  
759 *Heligmosomoides polygyrus* in mice of differing response phenotype. *J. Helminthol*.  
760 2003; **77**:133–146.DOI: 10.1079/JOH2003173.
- 761 25. **Wahid FN, Behnke JM.** Immunological relationships during primary infection with  
762 *Heligmosomoides polygyrus* (*Nematospiroides dubius*): parasite specific IgG1 antibody  
763 responses and primary response phenotype. *Parasite Immunol*. 1993; **15**:401–413.
- 764 26. **Wahid FN, Behnke JM, Grecis RK, Else KJ, Ben-Smith AW.** Immunological

- 765 relationships during primary infection with *Heligmosomoides polygyrus*: Th2 cytokines  
766 and primary response phenotype. *Parasitology*. 1994; **108** ( Pt 4):461–471.DOI:  
767 10.1017/s0031182000076022.
- 768 27. **Esser-von Bieren J, Mosconi I, Guiet R, Piersgilli A, Volpe B, Chen F, Gause WC, et**  
769 **al.** Antibodies trap tissue migrating helminth larvae and prevent tissue damage by  
770 driving IL-4R-independent alternative differentiation of macrophages. *PLoS Pathog.*  
771 2013; **9**:e1003771.DOI: 10.1371/journal.ppat.1003771.
- 772 28. **Esser-von Bieren J, Volpe B, Kulagin M, Sutherland DB, Guiet R, Seitz A, Marsland**  
773 **BJ, et al.** Antibody-mediated trapping of helminth larvae requires CD11b and Fcγ  
774 receptor I. *J. Immunol.* 2015; **194**:1154–1163.DOI: 10.4049/jimmunol.1401645.
- 775 29. **Song E, Ouyang N, Hörbelt M, Antus B, Wang M, Exton MS.** Influence of  
776 alternatively and classically activated macrophages on fibrogenic activities of human  
777 fibroblasts. *Cell. Immunol.* 2000; **204**:19–28.DOI:  
778 <https://doi.org/10.1006/cimm.2000.1687>.
- 779 30. **Wynn T a, Ph D, Barron L.** Macrophages: master regulators of inflammation and  
780 fibrosis. *Semin. Liver Dis.* 2010; **30**:245–257.DOI: 10.1055/s-0030-  
781 1255354.Macrophages.
- 782 31. **Anthony B, Allen JT, Li YS, McManus DP.** Hepatic stellate cells and parasite-induced  
783 liver fibrosis. *Parasit. Vectors.* 2010; **3**:60.DOI: 10.1186/1756-3305-3-60.
- 784 32. **Friedman SL.** Mechanisms of disease: mechanisms of hepatic fibrosis and  
785 therapeutic implications. *Nat. Clin. Pract. Gastroenterol. & Hepatol.* 2004; **1**:98.
- 786 33. **Tomasek JJ, Gabbiani G, Hinz B, Chaponnier C, Brown RA.** Myofibroblasts and

- 787 mechano-regulation of connective tissue remodelling. *Nat. Rev. Mol. Cell Biol.* 2002;  
788 **3**:349.
- 789 34. **Wynn TA.** Common and unique mechanisms regulate fibrosis in various  
790 fibroproliferative diseases. *J. Clin. Invest.* 2007; **117**:524–529.DOI: 10.1172/JCI31487.
- 791 35. **Faz-López B, Morales-Montor J, Terrazas LI.** Role of macrophages in the repair  
792 process during the tissue migrating and resident helminth infections. *Biomed Res. Int.*  
793 2016; **2016**:8634603.DOI: 10.1155/2016/8634603.
- 794 36. **Chen G, Wang SH, Jang JC, Odegaard JI, Nair MG.** Comparison of RELM-alpha and  
795 RELM-beta single- and double-gene- deficient mice reveals that RELM-alpha expression  
796 dictates inflammation and worm expulsion in hookworm infection. *Infect. Immun.* 2016;  
797 **84**:1100–1111.DOI: 10.1128/IAI.01479-15.Editor.
- 798 37. **Teng X, Li D, Champion HC, Johns RA.** FIZZ1/RELM-alpha, a novel hypoxia-induced  
799 mitogenic factor in lung with vasoconstrictive and angiogenic properties. *Circ. Res.* 2003;  
800 **2**:1065–1067.DOI: 10.1161/01.RES.0000073999.07698.33.
- 801 38. **Schultz G, Clark W, Rotatori DS.** EGF and TGF- $\alpha$  in wound healing and repair. *J. Cell.*  
802 *Biochem.* 1991; **45**:346–352.DOI: 10.1002/jcb.240450407.
- 803 39. **Wong DTW, Donoff RB, Yang J, Song B-Z, Matossian K, Nagura N, Elovic A, et al.**  
804 Sequential expression of transforming growth factors  $\alpha$  and  $\beta$ (1) by eosinophils during  
805 cutaneous wound healing in the hamster. *Am. J. Pathol.* 1993; **143**:130–142.
- 806 40. **Herbert DBR, Holscher C, Mohrs M, Arendse B, Schwegmann A, Radwanska M,**  
807 **Leeto M, et al.** Alternative macrophage activation is essential for survival during  
808 schistosomiasis and downmodulates T Helper 1 responses and immunopathology.

- 809 *Immunity*. 2004; **20**:623–635.
- 810 41. **Wynn TA**. Cellular and molecular mechanisms of fibrosis. *J. Pathol.* 2008; **214**:199–  
811 210.DOI: 10.1002/path.2277.
- 812 42. **Zhao A, McDermott J, Urban JF, Gause W, Madden KB, Yeung KA, Morris SC, et al.**  
813 Dependence of IL-4, IL-13, and Nematode-Induced Alterations in Murine Small Intestinal  
814 Smooth Muscle Contractility on Stat6 and Enteric Nerves. *J. Immunol.* 2003; **171**:948 LP  
815 – 954.DOI: 10.4049/jimmunol.171.2.948.
- 816 43. **Vallance BA, Blennerhassett PA, Collins SM**. Increased intestinal muscle contractility  
817 and worm expulsion in nematode-infected mice. *Am. J. Physiol. Liver Physiol.* 1997;  
818 **272**:G321–G327.DOI: 10.1152/ajpgi.1997.272.2.G321.
- 819 44. **Marillier RG, Brombacher TM, Dewals B, Leeto M, Barkhuizen M, Govender D,**  
820 **Kellaway L, et al.** IL-4R $\alpha$ -responsive smooth muscle cells increase intestinal  
821 hypercontractility and contribute to resistance during acute Schistosomiasis. *Am. J.*  
822 *Physiol. Liver Physiol.* 2010; **298**:G943–G951.DOI: 10.1152/ajpgi.00321.2009.
- 823 45. **Vallance BA, Blennerhassett PA, Deng Y, Matthaei KI, Young IG, Collins SM**. IL-5  
824 contributes to worm expulsion and muscle hypercontractility in a primary T.  
825 spiralisinfection. *Am. J. Physiol. Liver Physiol.* 1999; **277**:G400–G408.DOI:  
826 10.1152/ajpgi.1999.277.2.G400.
- 827 46. **Townsend JM, Fallon GP, Matthews JD, Smith P, Jolin EH, McKenzie NA**. IL-9-  
828 deficient mice establish fundamental roles for IL-9 in pulmonary mastocytosis and  
829 goblet cell hyperplasia but not T cell development. *Immunity*. 2000; **13**:573–583.DOI:  
830 10.1016/s1074-7613(00)00056-x.

- 831 47. **Urban JFJ, Noben-Trauth N, Donaldson DD, Madden KB, Morris SC, Collins M,**  
832 **Finkelman FD.** IL-13, IL-4/Ralpha, and Stat6 are required for the expulsion of the  
833 gastrointestinal nematode parasite *Nippostrongylus brasiliensis*. *Immunity*. 1998; **8**:255–  
834 264. DOI: 10.1016/s1074-7613(00)80477-x.
- 835 48. **Herbert DR, Yang J-Q, Hogan SP, Groschwitz K, Khodoun M, Munitz A, Orekov T, et**  
836 **al.** Intestinal epithelial cell secretion of RELM-beta protects against gastrointestinal  
837 worm infection. *J. Exp. Med.* 2009; **206**:2947–57. DOI: 10.1084/jem.20091268.
- 838 49. **Mccooy KD, Stoel M, Stettler R, Merky P, Fink K, Senn BM, Schaer C, et al.** Article  
839 Polyclonal and Specific Antibodies Mediate Protective Immunity against Enteric  
840 Helminth Infection. 2008:362–373. DOI: 10.1016/j.chom.2008.08.014.
- 841 50. **Basyoni MMA, Rizk EMA.** Nematodes ultrastructure: complex systems and  
842 processes. *J. Parasit. Dis.* 2016; **40**:1130–1140. DOI: 10.1007/s12639-015-0707-8.
- 843 51. **Bancroft AJ, Else KJ, Humphreys NE, Grecis RK.** The effect of challenge and trickle  
844 *Trichuris muris* infections on the polarisation of the immune response. *Int. J. Parasitol.*  
845 2001; **31**:1627–1637. DOI: [https://doi.org/10.1016/S0020-7519\(01\)00281-8](https://doi.org/10.1016/S0020-7519(01)00281-8).
- 846 52. **Mihi B, Meulder FVAN, Vancoppennolle S, Rinaldi M, Chiers K, Broeck WVANDEN.**  
847 Analysis of the mucosal immune responses induced by single and trickle infections with  
848 the bovine abomasal nematode *Ostertagia ostertagi*. 2014; **13**:150–156. DOI:  
849 10.1111/pim.12094.
- 850 53. **Brailsford TJ, Behnke JM.** The dynamics of trickle infections with *Heligmosomoides*  
851 *polygyrus* in syngeneic strains of mice. *Int. J. Parasitol.* 1992; **22**:351–359.
- 852 54. **McKenzie GJ, Fallon PG, Emson CL, Grecis RK, McKenzie ANJ.** Simultaneous



853 disruption of interleukin (IL)-4 and IL-13 defines individual roles in T helper cell type 2-  
854 mediated responses. *J. Exp. Med.* 1999; **189**:1565–1572. Available at:  
855 [/pmc/articles/PMC2193635/?report=abstract](#) [Accessed October 8, 2020].DOI:  
856 10.1084/jem.189.10.1565.

857 55. **Urban JF, Noben-Trauth N, Donaldson DD, Madden KB, Morris SC, Collins M,**  
858 **Finkelman FD.** IL-13, IL-4R $\alpha$ , and Stat6 are required for the expulsion of the  
859 gastrointestinal nematode parasite *Nippostrongylus brasiliensis*. *Immunity*. 1998; **8**:255–  
860 264. Available at: <https://pubmed.ncbi.nlm.nih.gov/9492006/> [Accessed October 8,  
861 2020].DOI: 10.1016/S1074-7613(00)80477-X.

862 56. **Oeser K, Schwartz C, Voehringer D.** Conditional IL-4/IL-13-deficient mice reveal a  
863 critical role of innate immune cells for protective immunity against gastrointestinal  
864 helminths. *Mucosal Immunol.* 2015; **8**:672–682. Available at:  
865 <https://pubmed.ncbi.nlm.nih.gov/25336167/> [Accessed October 8, 2020].DOI:  
866 10.1038/mi.2014.101.

867 57. **King IL, Mohrs K, Meli AP, Downey J, Lanthier P, Tzelepis F, Fritz JH, et al.** Intestinal  
868 helminth infection impacts the systemic distribution and function of the naïve  
869 lymphocyte pool. *Mucosal Immunol.* 2017; **10**:1160–1168.

870 58. **Bancroft AJ, Grecis RK, Else KJ, Devaney E.** Cytokine production in BALB/c mice  
871 immunized with radiation attenuated third stage larvae of the filarial nematode, *Brugia*  
872 *pahangi*. *J. Immunol.* 1993; **150**:1395 LP – 1402.

873 59. **Matthew L, Little MC, Barrett J, Else KJ.** Absence of CC Chemokine Ligand 2 Results  
874 in an Altered Th1/Th2 Cytokine Balance and Failure to Expel *Trichuris muris* Infection.

- 875 2019.DOI: 10.4049/jimmunol.170.9.4693.
- 876 60. **Reynolds LA, Maizels RM.** In the absence of TGF- $\beta$  signaling in T cells, fewer CD103+  
877 regulatory T cells develop, but exuberant IFN- $\gamma$  production renders mice more  
878 susceptible to helminth infection. *J. Immunol.* 2012; **189**:1113–7.
- 879 61. **Shea-donohue T, Notari L, Stiltz J, Sun R, Madden KB, Urban Jr JF, Zhao A.** Role of  
880 enteric nerves in immune-mediated changes in protease-activated receptor 2 effects on  
881 gut function. *Neurogastroenterol. Motil.* 2010; **22**:1138-e291.DOI: 10.1111/j.1365-  
882 2982.2010.01557.x.
- 883 62. **Fallon PG, Jolin HE, Smith P, Emson CL, Townsend MJ, Fallon R, Smith P, et al.** IL-4  
884 induces characteristic Th2 responses even in the combined absence of IL-5, IL-9, and IL-  
885 13. *Immunity.* 2002; **17**:7–17.DOI: 10.1016/S1074-7613(02)00332-1.
- 886 63. **Cao AT, Yao S, Gong B, Nurieva RI, Elson CO, Cong Y.** Interleukin (IL)-21 promotes  
887 intestinal IgA response to microbiota. *Mucosal Immunol.* 2015; **8**:1072–1082. Available  
888 at: <https://pubmed.ncbi.nlm.nih.gov/25586558/> [Accessed October 8, 2020].DOI:  
889 10.1038/mi.2014.134.
- 890 64. **Strandmark J, Steinfelder S, Berek C, Kühl AA, Rausch S, Hartmann S.** Eosinophils  
891 are required to suppress Th2 responses in Peyer’s patches during intestinal infection by  
892 nematodes. *Mucosal Immunol.* 2016; **10**:1–12.DOI: 10.1038/mi.2016.93.
- 893 65. **Nair MG, Gallagher IJ, Taylor MD, Loke P, Coulson PS, Wilson R a, Maizels RM, et**  
894 **al.** Chitinase and Fizz family members are a generalized feature of nematode infection  
895 with selective upregulation of Ym1 and Fizz1 by antigen-presenting cells. *Infect. Immun.*  
896 2005; **73**:385–394.DOI: 10.1128/IAI.73.1.385-394.2005.

- 897 **66. Frohberger SJ, Fercoq F, Neumann A-L, Surendar J, Stamminger W, Ehrens A,**  
898 **Karunakaran I, et al.** S100A8/S100A9 deficiency increases neutrophil activation and  
899 protective immune responses against invading infective L3 larvae of the filarial  
900 nematode *Litomosoides sigmodontis* Bennuru S, ed. *PLoS Negl. Trop. Dis.* 2020;  
901 **14**:e0008119. Available at: <https://dx.plos.org/10.1371/journal.pntd.0008119> [Accessed  
902 October 8, 2020].DOI: 10.1371/journal.pntd.0008119.
- 903 **67. Finney CA, Taylor MD, Wilson MS, Maizels RM.** Expansion and activation of  
904 CD4+CD25+ regulatory T cells in *Heligmosomoides polygyrus* infection. *Eur. J. Immunol.*  
905 2007; **37**:1874–1886.DOI: 10.1002/eji.200636751.
- 906 **68. Olds GR, Griffin A, Kresina TF.** Dynamics of collagen accumulation and  
907 polymorphism in murine *Schistosoma japonicum*. *Gastroenterology.* 1985; **89**:617–  
908 624.DOI: [https://doi.org/10.1016/0016-5085\(85\)90459-7](https://doi.org/10.1016/0016-5085(85)90459-7).
- 909 **69. Park MK, Kim H-J, Cho MK, Kang SA, Park SY, Jang SB, Yu HS.** Identification of a host  
910 collagen inducing factor from the excretory secretory proteins of *Trichinella spiralis*.  
911 *PLoS Negl. Trop. Dis.* 2018; **12**:e0006516.
- 912 **70. Mosconi I, Dubey LK, Volpe B, Esser-von Bieren J, Zaiss MM, Lebon L, Massacand**  
913 **JC, et al.** Parasite proximity drives the expansion of regulatory T cells in Peyer’s patches  
914 following intestinal helminth infection. *Infect. Immun.* 2015; **83**:3657–3665.
- 915 **71. Donskow-Łysoniewska K, Brodaczewska K, Doligalska M.** *Heligmosomoides*  
916 *polygyrus* antigens inhibit the intrinsic pathway of apoptosis by overexpression of  
917 survivin and Bcl-2 protein in CD4 T cells. *Prion.* 2013; **7**:319–327. Available at:  
918 </pmc/articles/PMC3904318/?report=abstract> [Accessed October 7, 2020].DOI:

919 10.4161/pri.25008.

920 **72. Durigova M, Troeberg L, Nagase H, Roughley PJ, Mort JS.** Involvement of ADAMTS5

921 and hyaluronidase in aggrecan degradation and release from OSM-stimulated cartilage.

922 *Eur. Cell. Mater.* 2011; **21**:31–45. Available at:

923 <http://www.ncbi.nlm.nih.gov/pubmed/21225593> [Accessed October 7, 2020].DOI:

924 10.22203/ecm.v021a03.

925 **73. Urbich C, Rössig L, Kaluza D, Potente M, Boeckel JN, Knau A, Diehl F, et al.** HDAC5 is

926 a repressor of angiogenesis and determines the angiogenic gene expression pattern of

927 endothelial cells. *Blood.* 2009; **113**:5669–5679. Available at:

928 [http://ashpublications.org/blood/article-](http://ashpublications.org/blood/article-pdf/113/22/5669/1488982/zh802209005669.pdf)

929 [pdf/113/22/5669/1488982/zh802209005669.pdf](http://ashpublications.org/blood/article-pdf/113/22/5669/1488982/zh802209005669.pdf) [Accessed October 7, 2020].DOI:

930 10.1182/blood-2009-01-196485.

931 **74. Grainger JR, Smith KA, Hewitson JP, McSorley HJ, Harcus Y, Filbey KJ, Finney CAM,**

932 **et al.** Helminth secretions induce de novo T cell Foxp3 expression and regulatory

933 function through the TGF- $\beta$  pathway. *J. Exp. Med.* 2010; **207**:2331–41.

934 **75. Zhu B-M, Ishida Y, Robinson GW, Pacher-Zavisin M, Yoshimura A, Murphy PM,**

935 **Hennighausen L.** SOCS3 Negatively Regulates the gp130-STAT3 Pathway in Mouse Skin

936 Wound Healing. *J. Invest. Dermatol.* 2008; **128**:1821–1829. Available at:

937 [www.jidonline.org](http://www.jidonline.org) [Accessed October 7, 2020].DOI: 10.1038/sj.jid.5701224.

938 **76. Spadaro O, Camell CD, Bosurgi L, Nguyen KY, Youm YH, Rothlin C V., Dixit VD.** IGF1

939 Shapes Macrophage Activation in Response to Immunometabolic Challenge. *Cell Rep.*

940 2017; **19**:225–234. Available at:

941 <http://dx.doi.org/10.1016/j.celrep.2017.03.046>[http://dx.doi.org/10.1016/j.celrep.2017.](http://dx.doi.org/10.1016/j.celrep.2017.03.046)

942 03.046 [Accessed October 7, 2020].DOI: 10.1016/j.celrep.2017.03.046.

943 77. **Alavi M V, Mao M, Pawlikowski BT, Kvezereli M, Duncan JL, Libby RT, John SWM,**

944 ***et al.*** Col4a1 mutations cause progressive retinal neovascular defects and retinopathy.

945 *Sci. Rep.* 2016; **6**:18602.DOI: 10.1038/srep18602.

946 78. **Ponticos M, Holmes AM, Shi-wen X, Leoni P, Khan K, Rajkumar VS, Hoyles RK, *et al.***

947 Pivotal role of connective tissue growth factor in lung fibrosis: MAPK-dependent

948 transcriptional activation of type I collagen. *Arthritis Rheum.* 2009; **60**:2142–2155.DOI:

949 10.1002/art.24620.

950 79. **Jiang X, Wu M, Xu XIN, Zhang L, Huang Y, Xu Z, He K, *et al.*** COL12A1 , a novel

951 potential prognostic factor and therapeutic target in gastric cancer. 2019:3103–

952 3112.DOI: 10.3892/mmr.2019.10548.

953 80. **Liu Q, Kreider T, Bowdridge S, Liu Z, Song Y, Gaydo AG, Urban JFJ, *et al.*** B cells have

954 distinct roles in host protection against different nematode parasites. *J. Immunol.* 2010;

955 **184**:5213–5223.DOI: 10.4049/jimmunol.0902879.

956

## 957 **FIGURE LEGENDS**

958

959 ***Figure 1: The trickle infection model results in C57Bl/6 mice developing a resistant***

960 ***phenotype.***

961 6-8 week old female C57Bl/6 and BALB/c mice were infected with 200 *H. polygyrus*

962 according to the bolus and trickle infection regimes. Adult worms were counted in the

963 small intestine at each time point using a dissection microscope. (A) Bolus infection  
964 regimen: mice are infected with 200 larvae on Day 0 (in grey). Worms develop in the tissue  
965 from day 0 to day 7 post-infection (in black), when adults emerge into the lumen and  
966 reside there for the duration of infection (in black). Worms are counted in the intestinal  
967 lumen on day 14, 21, and 28 post-infection. (B) Trickle infection regime: mice are infected  
968 with 200 larvae in total, but in multiple doses over the course of infection (in grey). For  
969 mice euthanised on day 7 post-infection (in black), doses of 50 larvae are trickled on days  
970 0, 1, 2 and 3 post-infection. This allows enough time for the last dose of larvae to enter  
971 the tissue and start developing. For mice euthanised on day 14 (in black), doses of 67  
972 larvae are trickled on days 0, 2 and 4 post-infection. For mice euthanised on day 21 (in  
973 black), doses of 33 larvae are trickled on days 0, 2, 4, 6, 8 and 10 post-infection. For mice  
974 euthanised on day 28 (in black), doses of 20 larvae are trickled on days 0, 2, 4, 6, 8, 10,  
975 12, 14, 16 and 18 post-infection. In each case (14, 21 and 28), there is a 10-day window  
976 after the final dose to allow parasites to fully develop into adults and migrate from the  
977 intestinal tissue to the intestinal lumen. (C) Worm burdens in BALB/c mice (white mouse)  
978 infected according to the bolus (black circles) and trickle (white circles) regimes. (D) Worm  
979 burdens in C57Bl/6 mice (black mouse) infected according to the bolus (black circles) and  
980 trickle (white circles) regimens. For (C) and (D), graphs represent pooled data from 2  
981 experiments, bars represent the median, with a minimum of 3 mice per group per  
982 experiment. A Kruskal Wallis test with Dunn's multiple comparisons test was performed  
983 to test for statistical significance between trickle and bolus groups at each time point, n.s.  
984 = not significant, \* =  $p < 0.05$ .

985 **Figure 2: Systemic IL-4 and IL-13 responses do not differ between bolus and trickle**  
986 **infected mice.** 6-8 week old female C57Bl/6 and BALB/c mice were infected with 200 *H.*  
987 *polygyrus* larvae according to the bolus and trickle infection regimes. Single cell  
988 suspensions were isolated from the mesenteric lymph nodes and spleens; these were  
989 cultured for 48 hours in the presence of *H. polygyrus* antigen. IL-4 and IL-13 cytokine levels  
990 were measured in the supernatant by ELISA. (A) Viable cell numbers (left) with their IL-4  
991 (middle) and IL-13 (right) production over the course of infection (d0, 7, 14, 21 and 28  
992 post-infection) in the MLN of BALB/c (white) (A) and C57Bl/6 (black) mice (B) as well as  
993 the SPL of BALB/c (white) (C) and C57Bl/6 (black) mice (D). Graphs represent pooled data  
994 from 2 experiments, bars represent the median, with a minimum of 3 mice per group per  
995 experiment. A Kruskal Wallis test with Dunn's multiple comparisons test was performed  
996 to test for statistical significance between trickle (white circles) and bolus groups (black  
997 circles) at each time point. No differences were found at any time point, in either organ,  
998 in either strain.

999

1000 **Figure 3: Serum IgG1 and IgE antibody levels do not differ between bolus and trickle**  
1001 **infected mice.** 6-8 week old female C57Bl/6 (black) and BALB/c (white) mice were infected  
1002 with 200 *H. polygyrus* larvae according to the bolus and trickle infection regimes. Serum  
1003 antibody levels were measured by ELISA for total IgE in Balb/C (A) and C57Bl/6 (B) mice  
1004 and parasite specific IgG1 for BALB/c (C) and C57Bl/6 (D) mice on days 0, 7, 14, 21 and 28  
1005 post infection. Levels in naïve controls and at day 7 post-infection were undetectable for  
1006 parasite specific IgG1. Graphs represent pooled data from 2 experiments, bars represent

1007 the median, with a minimum of 3 mice per group per experiment. A Kruskal Wallis test  
1008 with Dunn's multiple comparisons test was performed to test for statistical significance  
1009 between trickle (white circles) and bolus groups (black circles) at each time point. No  
1010 differences were found at any time point, for either antibody, in either strain.

1011

1012 **Figure 4: Aspects of the intestinal response to *H. polygyrus* differ between bolus and**  
1013 **trickle infected C57BL/6 mice at day 21 post-infection.** 6-8 week old female C57Bl/6 mice  
1014 were infected with 200 *H. polygyrus* larvae according to the bolus and trickle infection  
1015 regimes and euthanised on days 7, 21 and 28 post-infection. (A) Mice were fasted for 6  
1016 hours followed by Evans Blue administration. Time from dye administration to the passing  
1017 of dyed fecal pellets was measured and normalised to control animals (left). Small  
1018 intestines were dissected out and scraped using a glass slide leaving only the serosa. The  
1019 intestinal scrapings were weighed for each mouse and normalised to control animals  
1020 (right). (B) IL-4 (left) and IL-13 (right), as well as (C) IL-21 (left) and total IgA (right) were  
1021 measured in the intestinal scrapings by ELISA. Graphs represent pooled data from a  
1022 minimum of 2 experiments, bars represent the median, with a minimum of 2 mice per  
1023 group per experiment. A Kruskal Wallis test with Dunn's multiple comparisons test was  
1024 performed to test for statistical significance between trickle (white circles) and bolus  
1025 (black circles) groups at each time point, n.s. = not significant, \* =  $p < 0.05$ .

1026

1027 **Figure 5: Granuloma numbers remain stable over time in trickle-infected C56BL/6 mice.**

1028 6-8 week old female C57Bl/6 (black) and BALB/c (white) mice were infected with 200 *H.*



1029 *polygyrus* according to the bolus and trickle infection regimes. Granuloma were counted  
1030 in the small intestine at each time point using a dissection microscope. (A) Representative  
1031 images of a portion of a naïve (left), a bolus (middle) and a trickle (left) infected small  
1032 intestine at day 14 post-infection in C57Bl/6 mice. White arrows point to granulomas.  
1033 Granuloma number in BALB/c (B) and C57Bl/6 (C) mice infected according to the bolus  
1034 (black circles) and trickle (white circles) regimes. For (C) and (D), graphs represent pooled  
1035 data from 2 experiments, bars represent the median, with a minimum of 3 mice per group  
1036 per experiment. A Kruskal Wallis test with Dunn's multiple comparisons test was  
1037 performed to test for statistical significance between trickle and bolus groups at each time  
1038 point, n.s. = not significant, \* =  $p < 0.05$ , \*\*\*\* =  $p < 0.0001$ .

1039

1040 **Figure 6: Transcriptional profiles differ between granulomas from bolus and trickle**  
1041 **infected mice.** 6-8 week old female (7 days post-infection) and male (21 days post-  
1042 infection) C57Bl/6 mice were infected with 200 *H. polygyrus* according to the bolus and  
1043 trickle infection regimes. We used the nanostring nCounter mouse myeloid innate  
1044 immunity V2 panel to measure the expression profiles of 754 gene encoding mRNAs  
1045 within the granulomas. PCA plots highlighting differential gene expression at days 7 (left)  
1046 and 21 (right) post infection.

1047

1048 **Figure 7: Ten genes are differentially expressed between granulomas from bolus and**  
1049 **trickle infected mice 7 days post-infection.** . 6-8 week old female (7 days post-infection)  
1050 C57Bl/6 mice were infected with 200 *H. polygyrus* according to the bolus and trickle

1051 infection regimes. We used the nanostring nCounter mouse myeloid innate immunity V2  
1052 panel to measure the expression profiles of 754 gene encoding mRNAs within the  
1053 granulomas. (A) Summary of differentially expressed genes (*adjusted p* < 0.05; FC >2) in  
1054 each pairwise comparison showing differentially expressed genes in red and blue in a  
1055 volcano plot, the total number of differentially expressed genes in the middle of the  
1056 bidirectional arrows, and arrowheads showing the direction of differential expression for  
1057 all and highly (FC = 4–16) differentially expressed genes. (B) Heatmap showing the relative  
1058 expression of differentially expressed genes associated with the regulation of myeloid  
1059 immune responses between bolus- and trickle-infected mice.

1060

1061 **Figure 8: Thirty six genes are differentially expressed between granulomas from bolus**  
1062 **and trickle infected mice 21 days post-infection.** 6-8 week old male (21 days post-  
1063 infection) C57Bl/6 mice were infected with 200 *H. polygyrus* according to the bolus and  
1064 trickle infection regimes. We used the nanostring nCounter mouse myeloid innate  
1065 immunity V2 panel to measure the expression profiles of 754 gene encoding mRNAs  
1066 within the granulomas. (A) Summary of differentially expressed genes (*adjusted p* < 0.05;  
1067 FC >2) in each pairwise comparison showing differentially expressed genes in red and blue  
1068 in a volcano plot, the total number of differentially expressed genes in the middle of the  
1069 bidirectional arrows, and arrowheads showing the direction of differential expression for  
1070 all and highly (FC = 4–16) differentially expressed genes. (B) Heatmap showing the relative  
1071 expression of differentially expressed genes associated with the regulation of myeloid  
1072 immune responses between bolus- and trickle- infected mice.

1073 **Figure 9: IgG1 antibodies accumulate around encysted larvae in the acute granulomas**  
1074 **of trickle-infected C57Bl/6 mice.** 6-8 week old female C57Bl/6 mice were infected with  
1075 200 *H. polygyrus* according to bolus and/or trickle models of infection. (A) Trickle infection  
1076 regimen (acute granulomas): mice are infected with 200 larvae in total but spread out  
1077 over infection (in grey). For mice euthanised on day 14 (in black), doses of 33 larvae are  
1078 trickled on days 0, 2, 4, 6, 8 and 10 post-infection. For mice euthanised on day 21 (in  
1079 black), doses of 20 larvae are trickled on days 0, 2, 4, 6, 8, 10, 12, 14, 16 and 18 post-  
1080 infection. In each case (14 and 21), there is a 3-4 days window after the final dose to allow  
1081 parasites to start developing in the mucosa and observe the formation of granulomas  
1082 around them. (B & C) Formalin fixed, paraffin-embedded 6 µm sections were obtained  
1083 from small intestine swiss rolls. These sections were co-stained with anti-mouse IgG1 and  
1084 DAPI. Whole sections were studied using the Thorlabs Tide whole-slide scanning  
1085 microscope, (20x objective). Antibody stain (left), isotype control stain (middle), and DAPI  
1086 stain (right). (B) Representative acute granulomas (with worms, white dashed lines) from  
1087 trickle infected mice at 14 (top) and 21 (bottom) days post-infection. (C) Representative  
1088 chronic granulomas (without worms, white dashed lines) from bolus (top) and trickle  
1089 (bottom) infected mice at 21 days post-infection. Experiments were performed at least  
1090 twice (minimum of 5 mice per group) and are representative of a total of 21 (bolus, day  
1091 14 post-infection), 19 (of which 3 were acute granulomas, trickle, day 14 post-infection),  
1092 7 (bolus, day 21 post-infection), 30 (of which 4 were acute granulomas, trickle, day 21  
1093 post-infection) granulomas. Scale bar=100µm.  
1094

1095 **Figure 10: IgG2c, IgE and IgA are not detected around encysted larvae in the granulomas**  
1096 **of trickle infected mice.** 6-8 week old female C57Bl/6 mice were infected with 200 *H.*  
1097 *polygyrus* according to the trickle (larvae) model of infection. (A-C) Formalin fixed,  
1098 paraffin-embedded 6 µm sections were obtained from small intestine swiss rolls. These  
1099 sections were co-stained with antibodies to the IgG2c, IgE and/or IgA antibody subtype,  
1100 as well as DAPI. Whole sections were studied using the Thorlabs Tide whole-slide scanning  
1101 microscope, (20x objective). Experiments were performed once (minimum of 5 mice per  
1102 group). Scale bar=100µm. (A) Representative images of granulomas from trickle infected  
1103 mice at 21 days post-infection stained with either anti-mouse IgG2c (top), IgE (middle) or  
1104 IgA (bottom). Antibody stain (left), DAPI stain (middle) and isotype control stain (right).  
1105 Photographs are representative of a total of 15 granulomas (of which 3 were acute  
1106 granulomas). The photographs here are of consecutive slides of the same granuloma as  
1107 depicted in Fig. 8C, bottom. (B) Representative images of intestinal tissue from trickle-  
1108 infected mice at 21 days post-infection stained with IgE. Antibody stain (left), DAPI stain  
1109 (middle) and isotype control stain (right). White arrows point to IgE accumulation in the  
1110 intestinal tissue. (D) Representative Peyer's Partch (top) and intestinal tissue (bottom)  
1111 from trickle- infected mice at 21 days post-infection stained with IgA. Antibody stain (left),  
1112 DAPI stain (middle) and isotype control stain (right). White arrows point to IgA  
1113 accumulation in the intestinal villi (top) and Peyer's patches (bottom).

1114

1115

1116

1117 **Figure S1: Eighty six genes are differentially expressed between granulomas from naïve**  
1118 **and infected mice (NvT and NvB) 7 days post-infection.** 6-8 week old female (7 days post-  
1119 infection) C57Bl/6 mice were infected with 200 *H. polygyrus* according to the bolus and  
1120 trickle infection regimes. We used the nanostring nCounter mouse myeloid innate  
1121 immunity V2 panel to measure the expression profiles of 754 gene encoding mRNAs  
1122 within the granulomas. Heatmap showing the relative expression of differentially  
1123 expressed genes associated with the regulation of myeloid immune responses between  
1124 naïve and infected mice (bolus and trickle).

1125

1126 **Figure S2: Eighty eight genes are differentially expressed between granulomas from**  
1127 **naïve and infected mice (NvT and NvB) 21 days post-infection.** 6-8 week old male (21  
1128 days post-infection) C57Bl/6 mice were infected with 200 *H. polygyrus* according to the  
1129 bolus and trickle infection regimes. We used the nanostring nCounter mouse myeloid  
1130 innate immunity V2 panel to measure the expression profiles of 754 gene encoding  
1131 mRNAs within the granulomas. Heatmap showing the relative expression of differentially  
1132 expressed genes associated with the regulation of myeloid immune responses between  
1133 naïve and infected mice (bolus and trickle).

1134

1135 **Figure S3: IgG1 antibodies are present in the chronic granulomas of both bolus- and**  
1136 **trickle-infected mice at day 21 post-infection.** 6-8 week old female C57Bl/6 mice were  
1137 infected with 200 *H. polygyrus* according to bolus and/or trickle regimes. Formalin fixed,  
1138 paraffin-embedded 6 µm sections were obtained from small intestine swiss rolls. These

1139 sections were co-stained with anti-mouse IgG1 and DAPI. Whole sections were studied  
1140 using the Thorlabs Tide whole-slide scanning microscope, (20x objective). Representative  
1141 granulomas (white dashed line) from bolus- (top) and trickle- (bottom) infected mice at  
1142 21 days (A) and 7 days (B) post-infection. Antibody stain (left), isotype control stain  
1143 (middle), and DAPI stain (right). For both groups, at day 7 post-infection, granulomas  
1144 contained worms (acute granulomas) while at 21 days post-infection they did not (chronic  
1145 granulomas). Experiments were performed at least twice (minimum of 5 mice per group)  
1146 and are representative of a total of 5 (bolus, day 21 post-infection), 8 (trickle, day 21 post-  
1147 infection), 8 (bolus, day 7 post-infection), and 17 (trickle, day 7 post-infection),  
1148 granulomas. Scale bar=100µm.

1149

1150 **Figure S4: IgG2c is detectable in the intestinal tissue of *C. rodentium* infected mice.** 6-8  
1151 week old female C57Bl/6 mice were infected with  $5 \times 10^8$  cfu/ mouse *C. rodentium*  
1152 *DBS100* strain by gavage as a positive control for IgG2c staining. Formalin fixed, paraffin-  
1153 embedded 6 µm sections were obtained from small intestinal swiss rolls. These sections  
1154 were co-stained with antibodies to the IgG2c (left) as well as DAPI (right). Whole sections  
1155 were visualized using the Thorlabs Tide whole-slide scanning microscope, (20x objective).  
1156 Experiment was performed once (minimum of 5 mice per group). White arrows point to  
1157 IgG2c staining within the lamina propria. Scale bar=100µm.

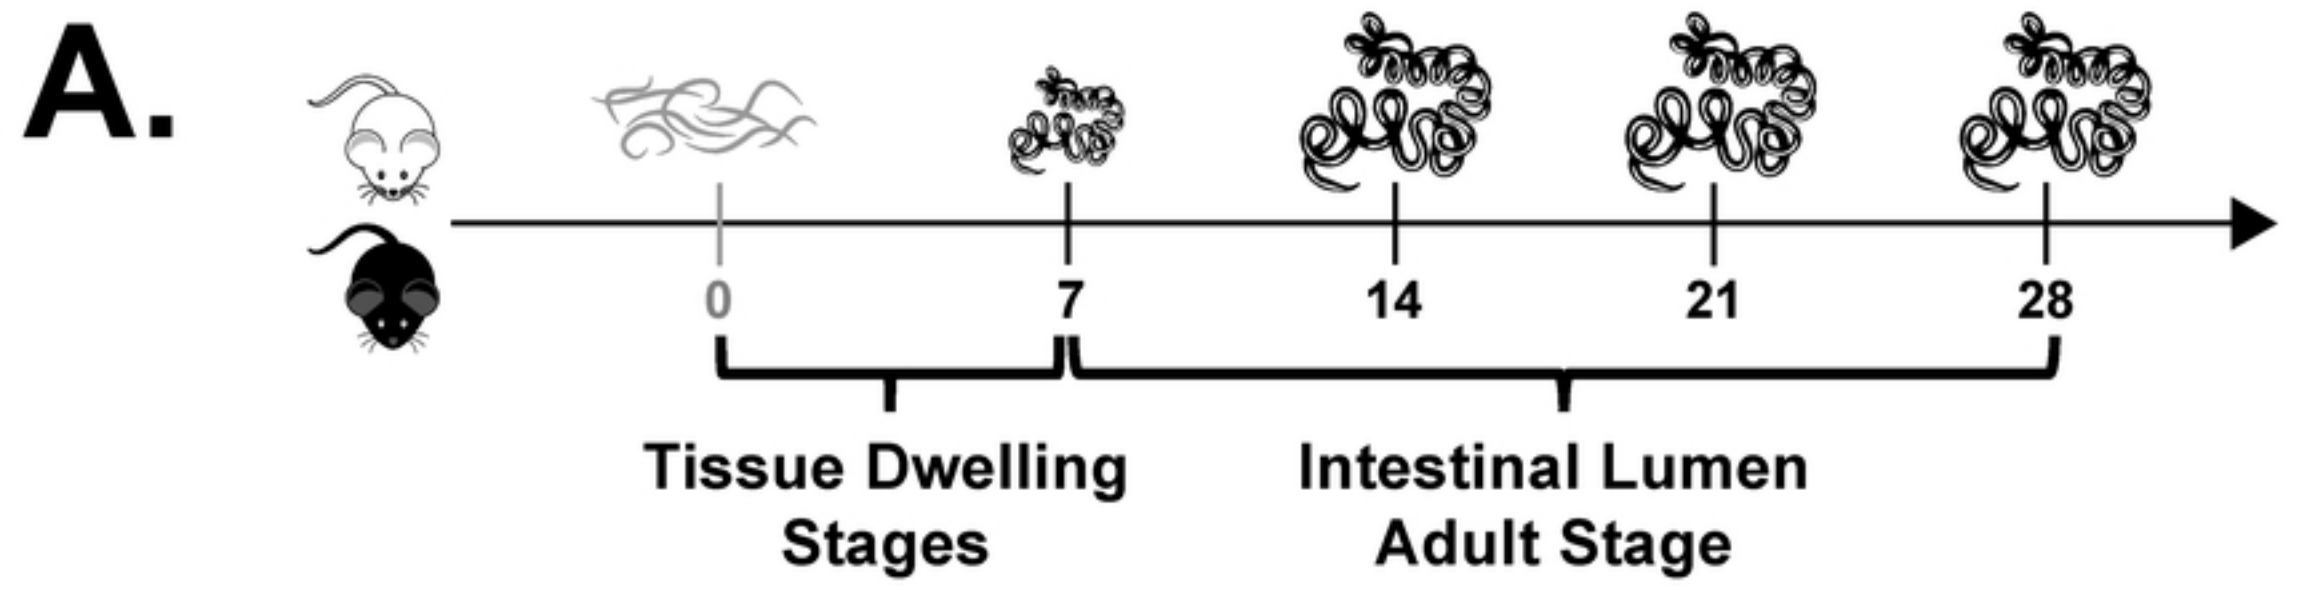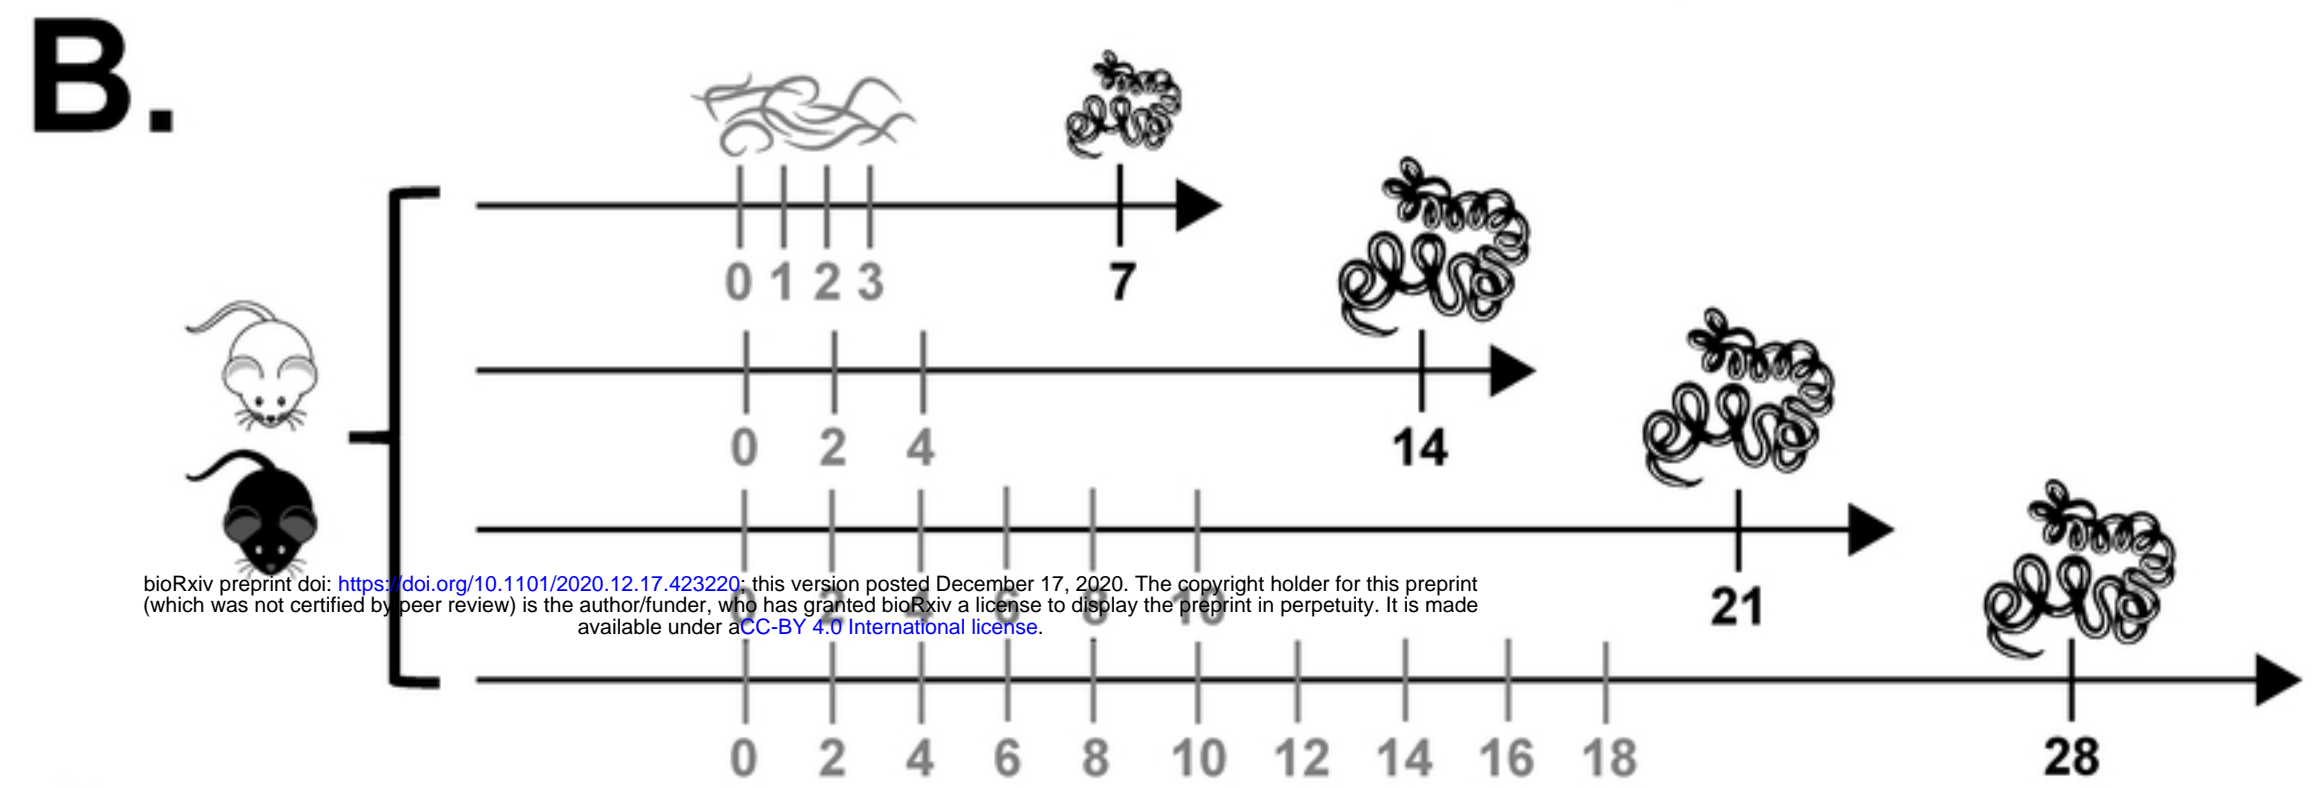

bioRxiv preprint doi: <https://doi.org/10.1101/2020.12.17.423220>; this version posted December 17, 2020. The copyright holder for this preprint (which was not certified by peer review) is the author/funder, who has granted bioRxiv a license to display the preprint in perpetuity. It is made available under aCC-BY 4.0 International license.

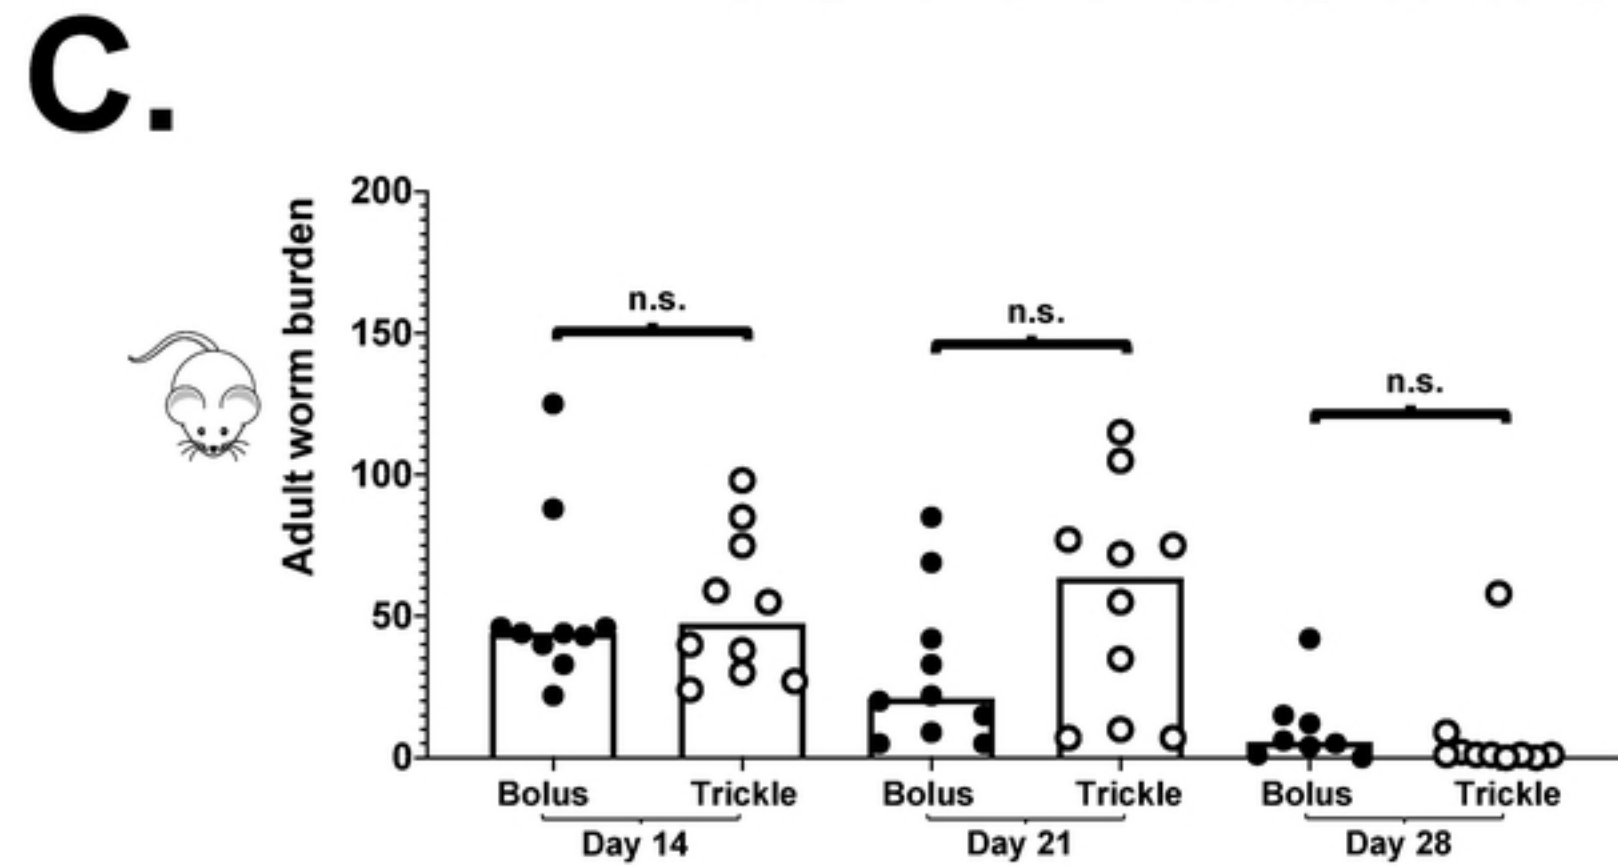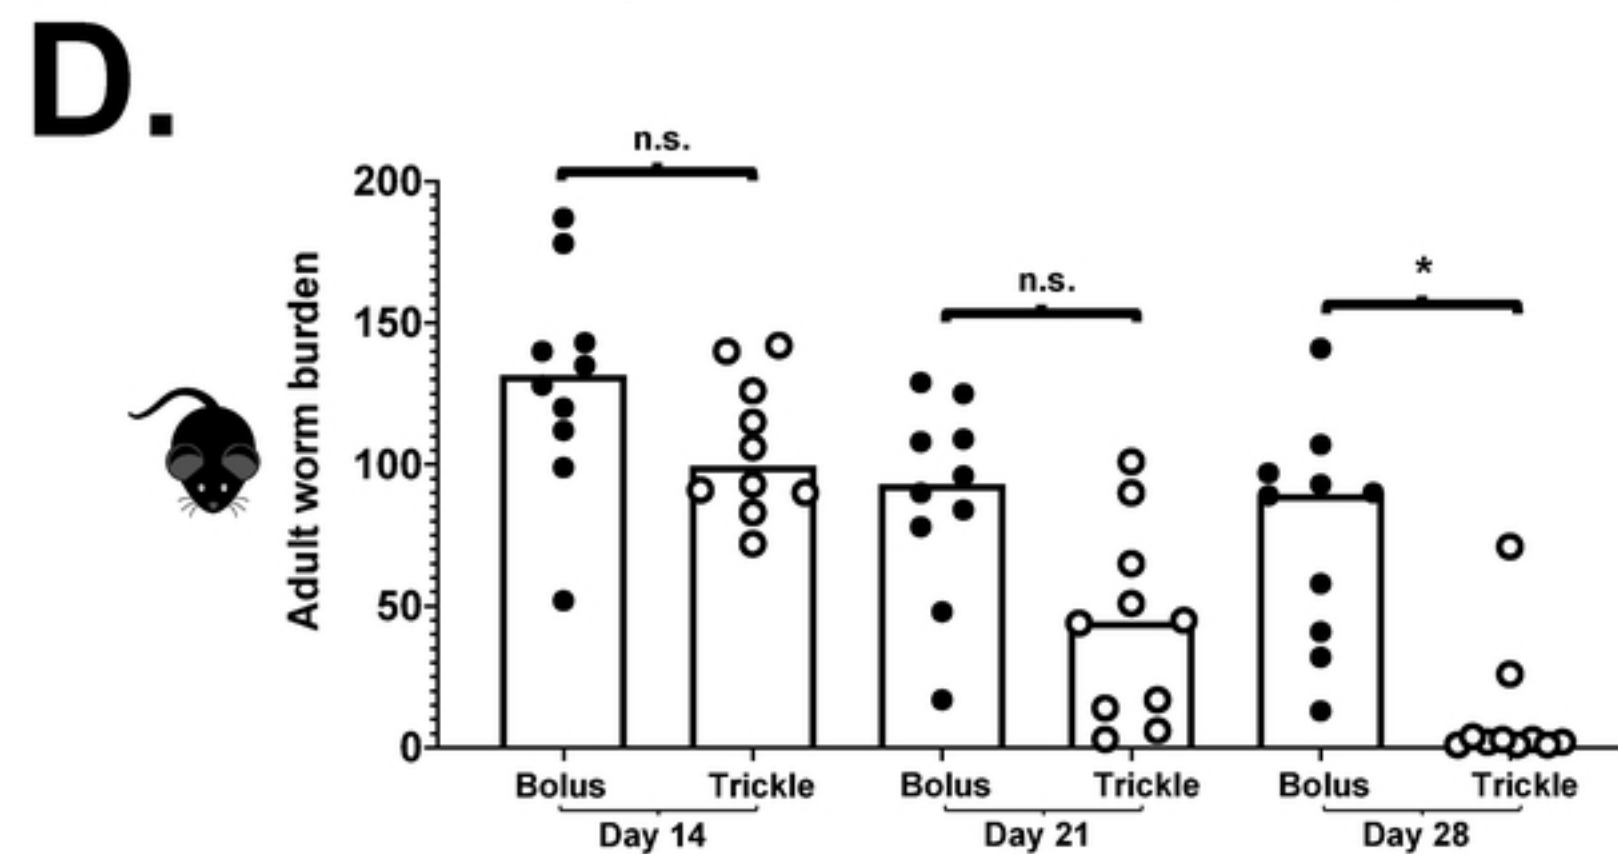

Figure 1

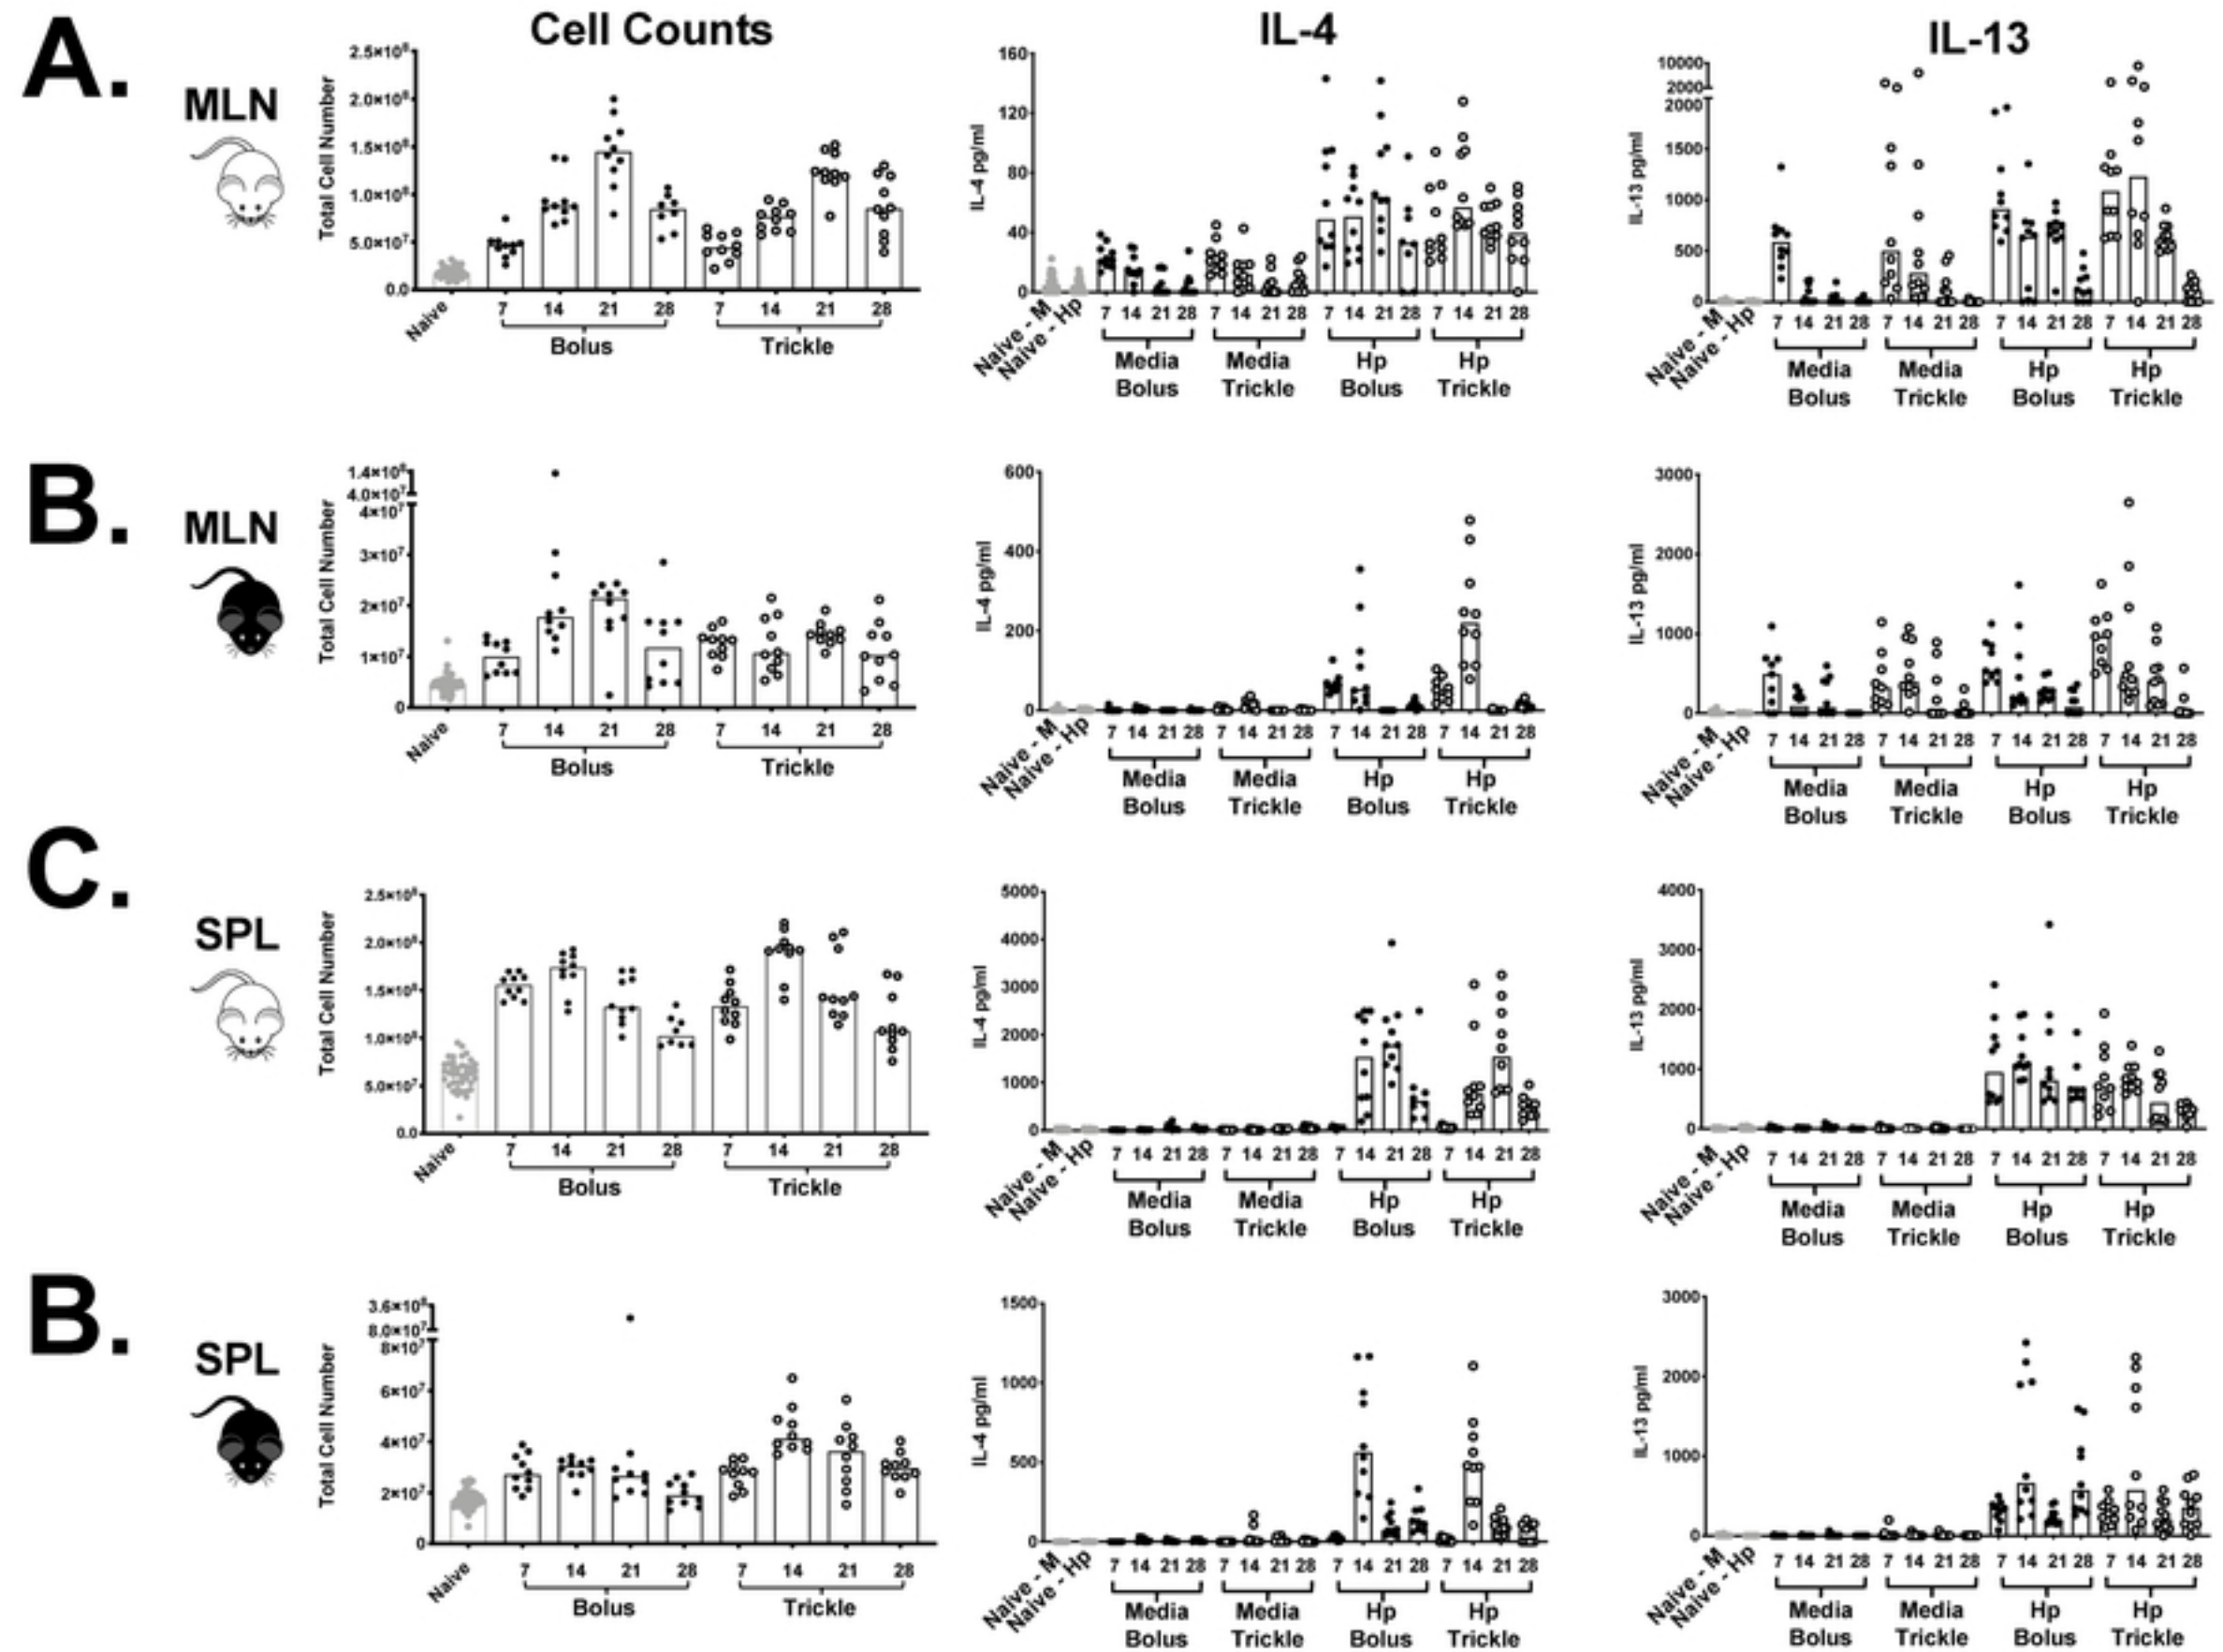

Figure 2



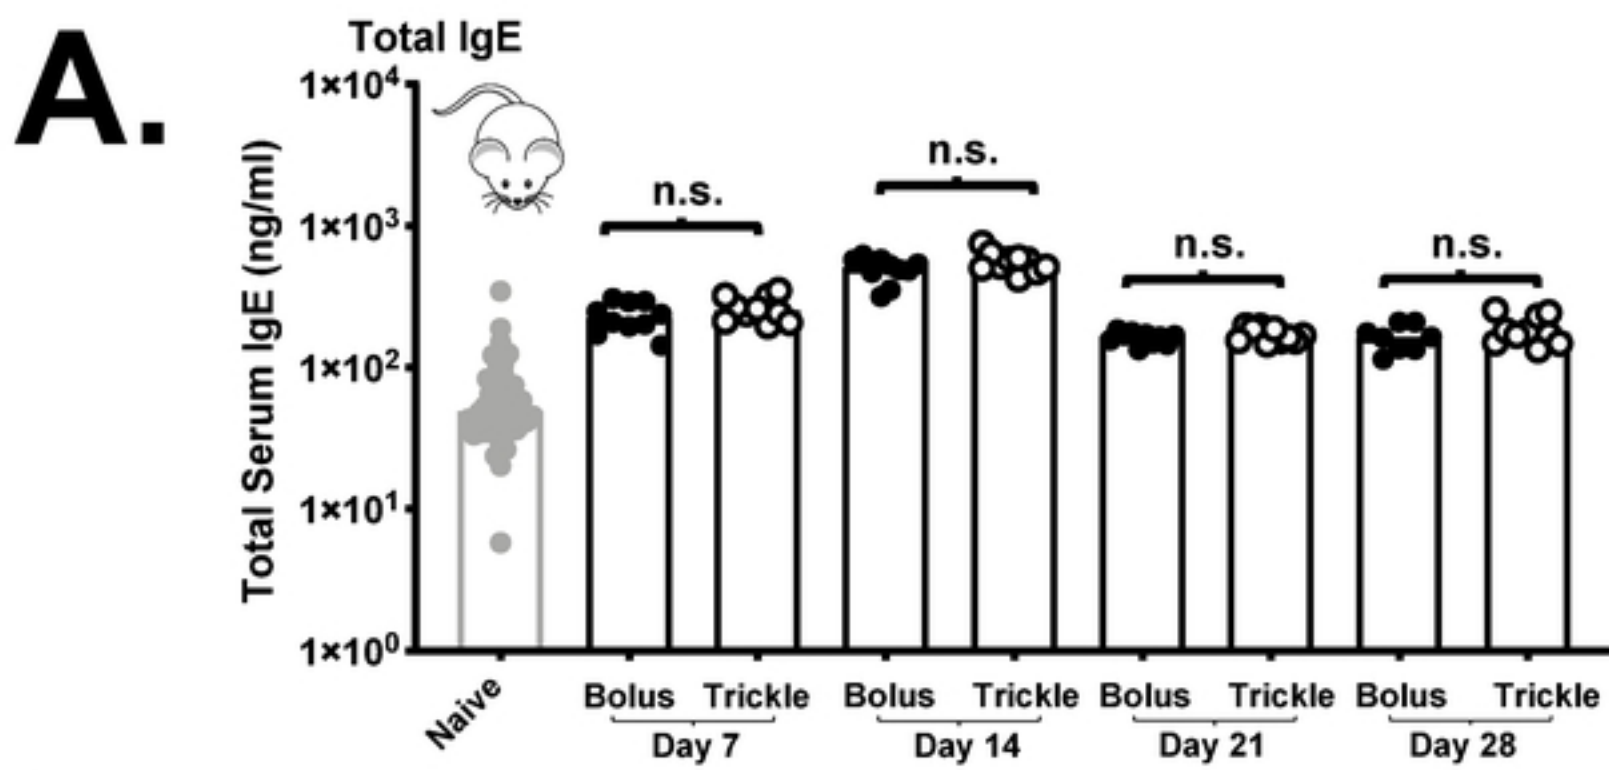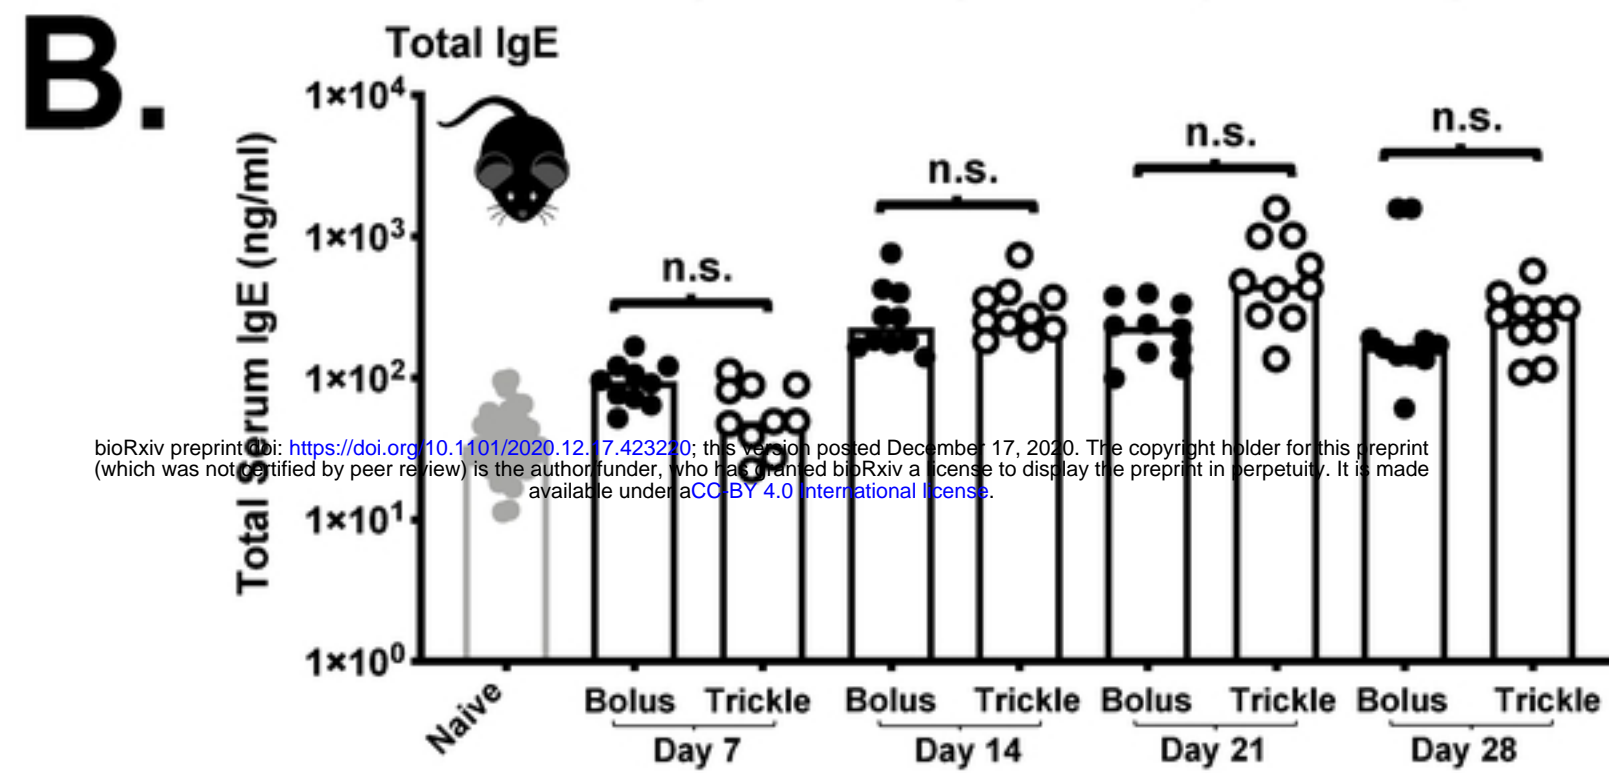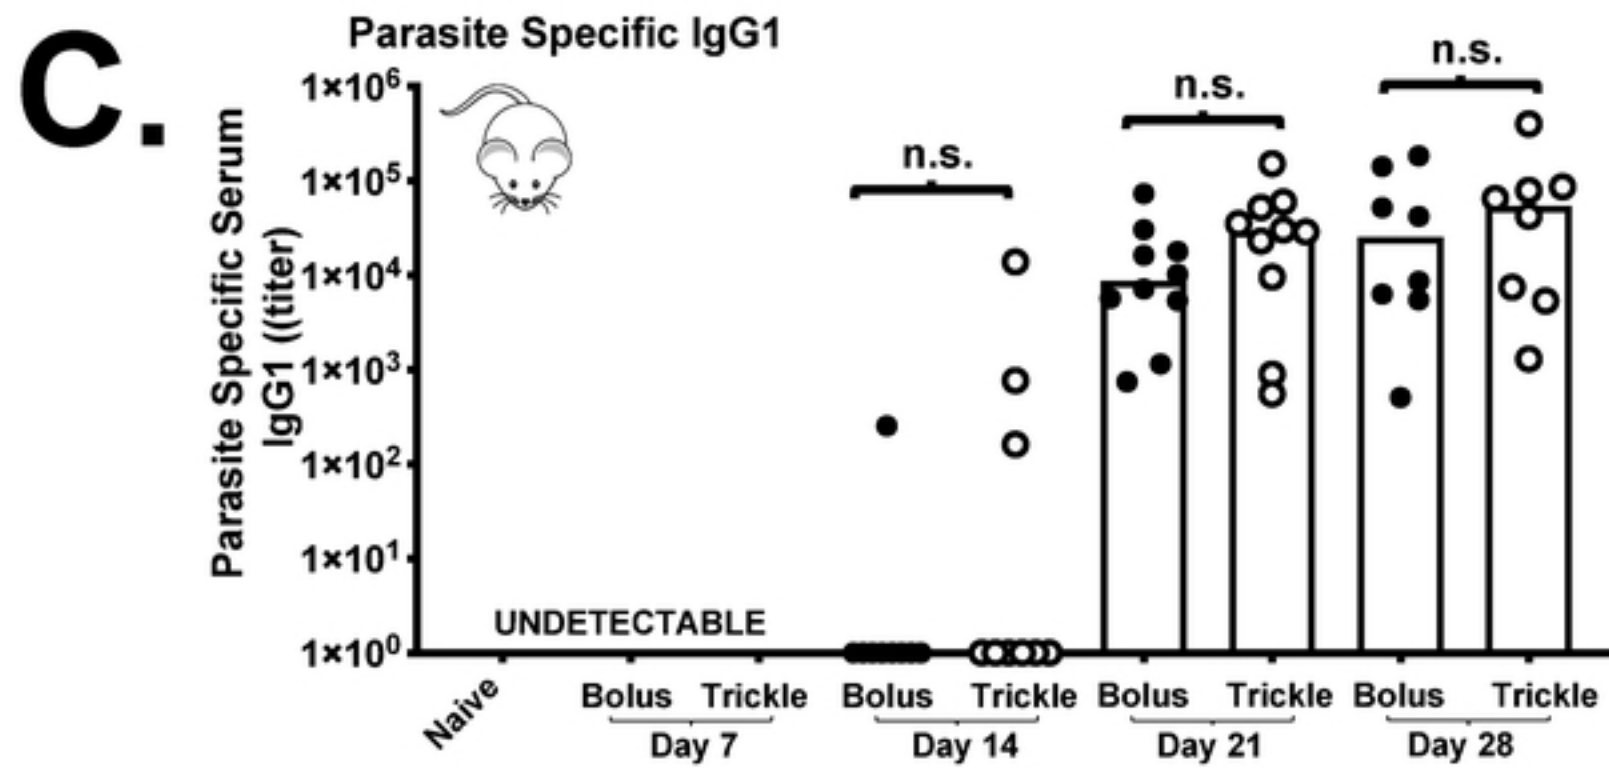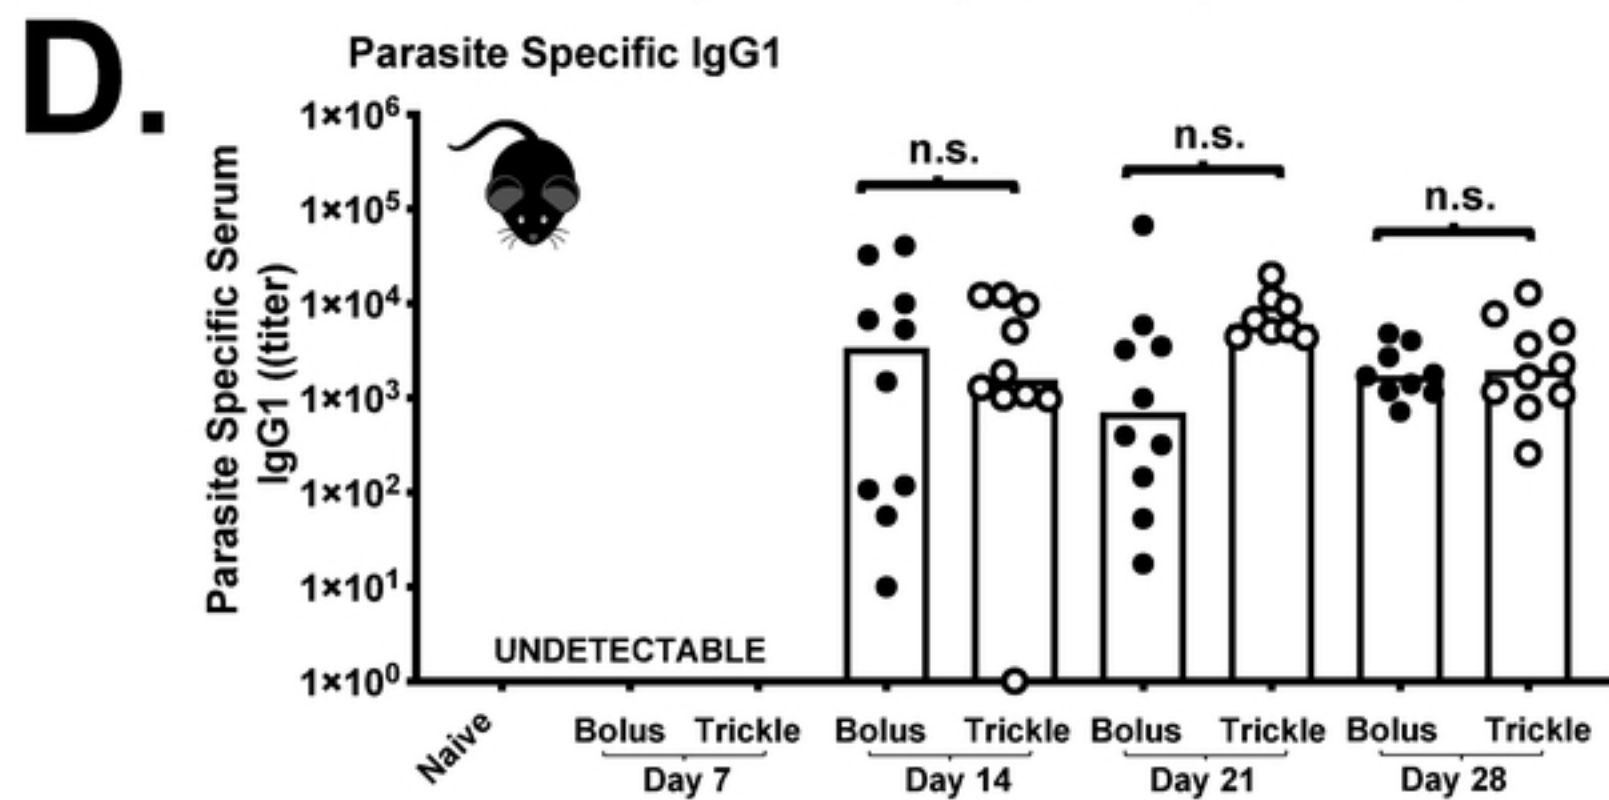

Figure 3

bioRxiv preprint doi: <https://doi.org/10.1101/2020.12.17.423220>; this version posted December 17, 2020. The copyright holder for this preprint (which was not certified by peer review) is the author/funder, who has granted bioRxiv a license to display the preprint in perpetuity. It is made available under aCC-BY 4.0 International license.

**A.**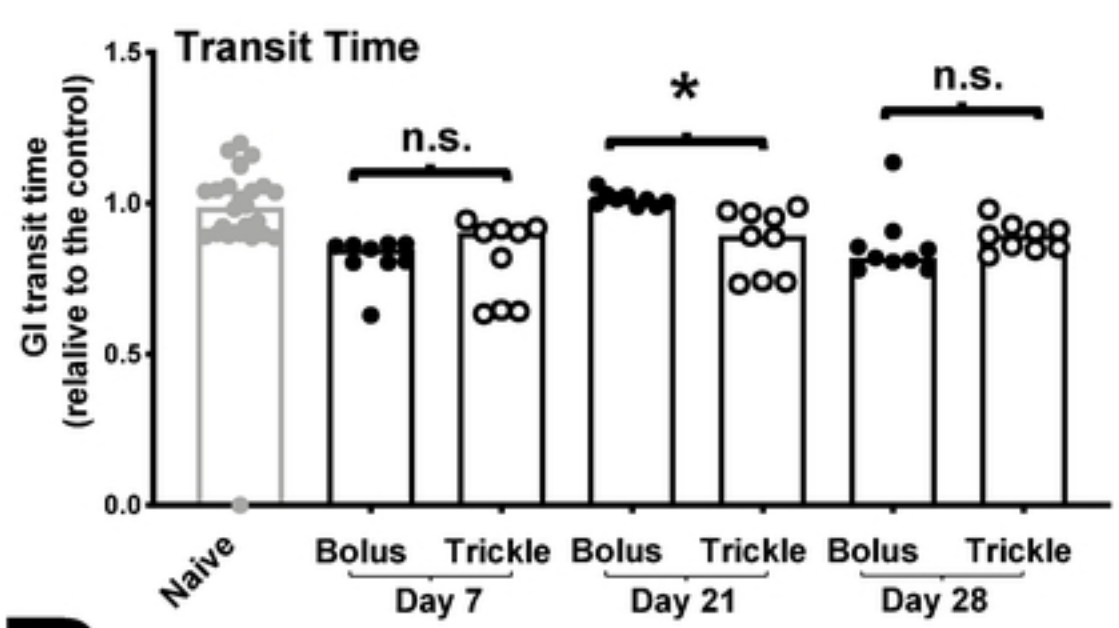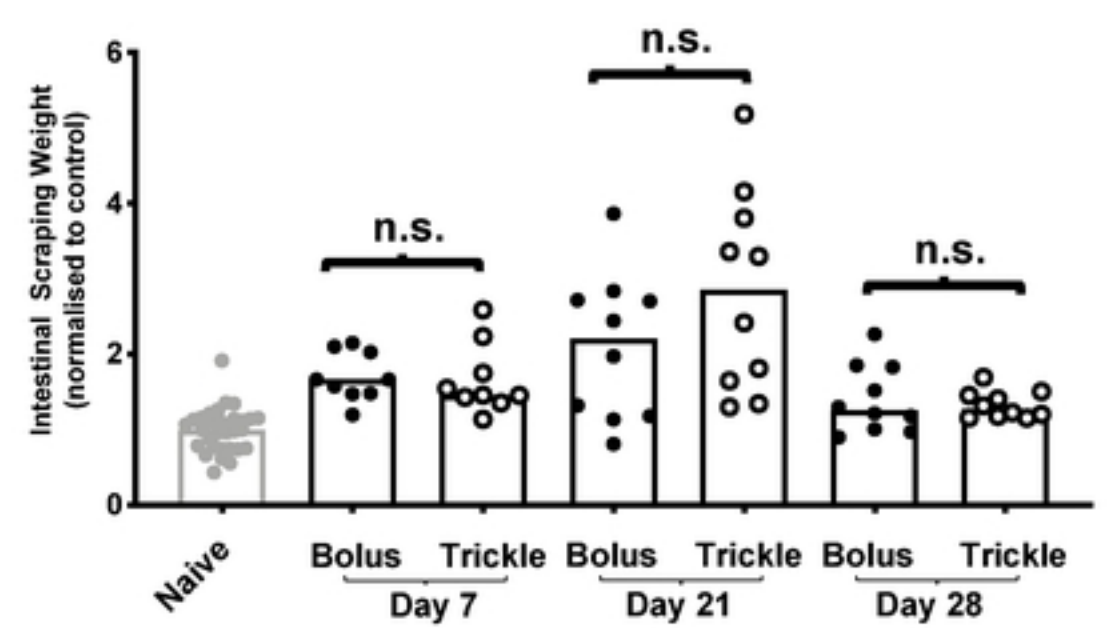**B.**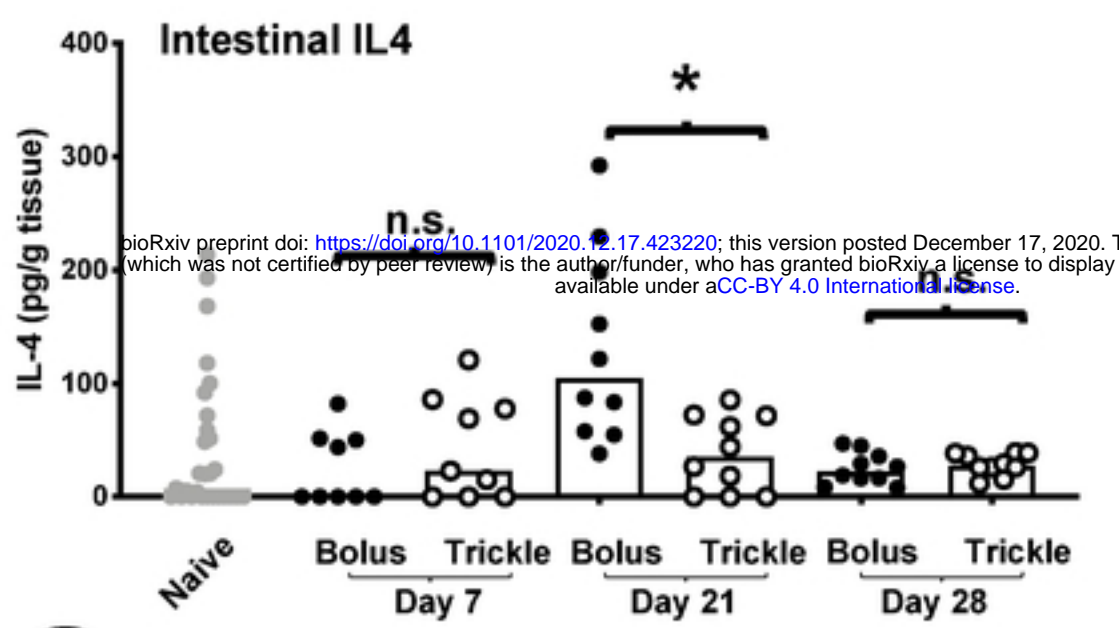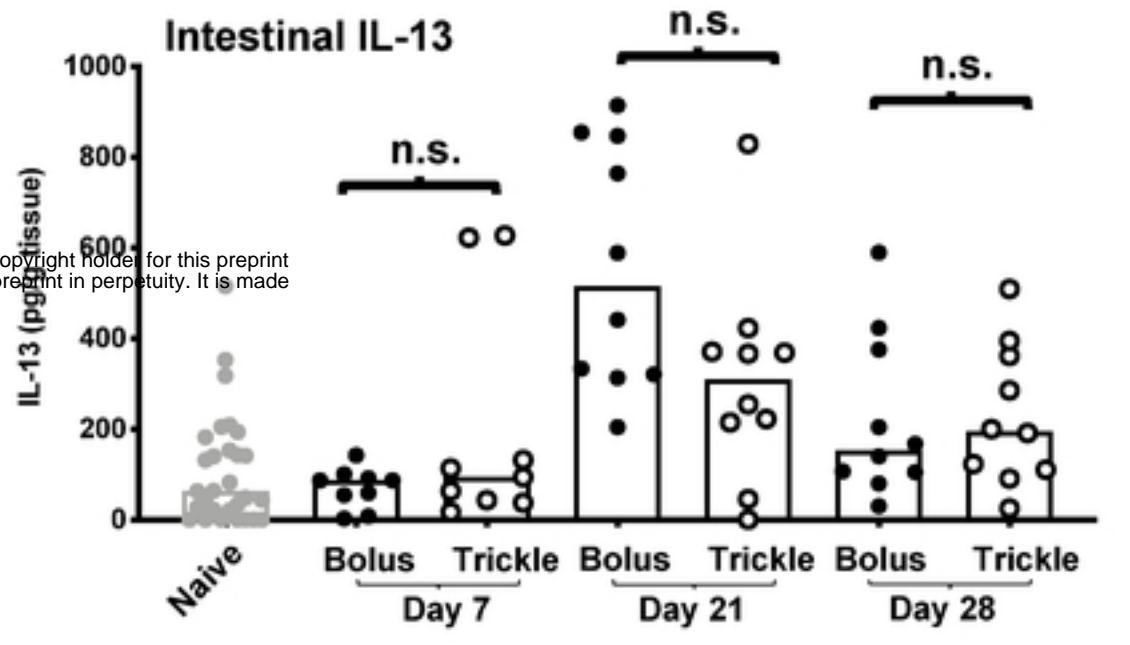**C.**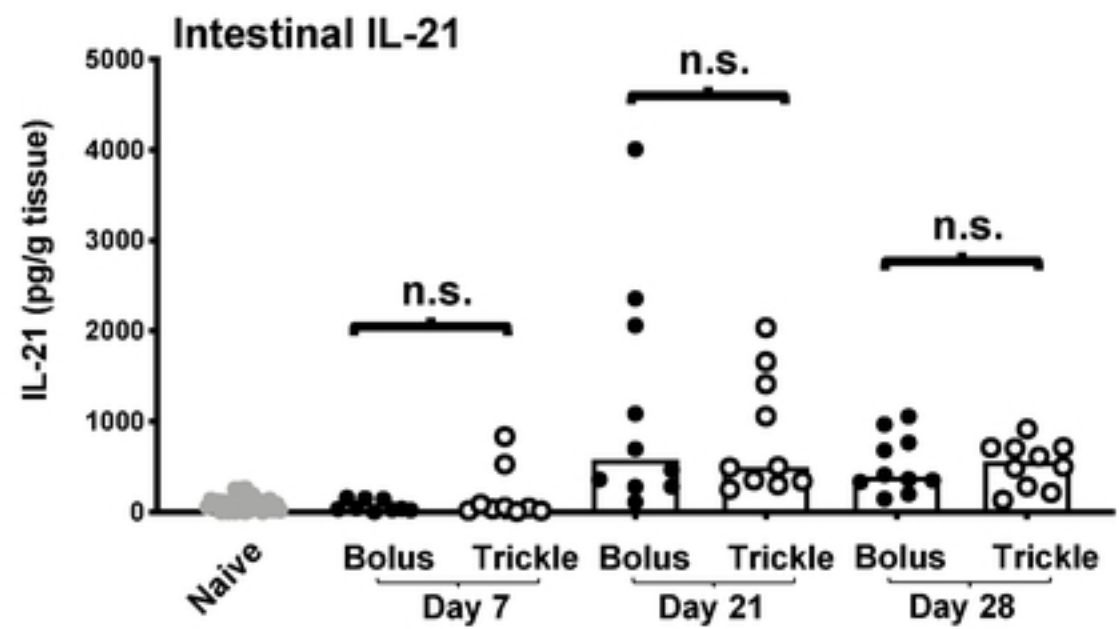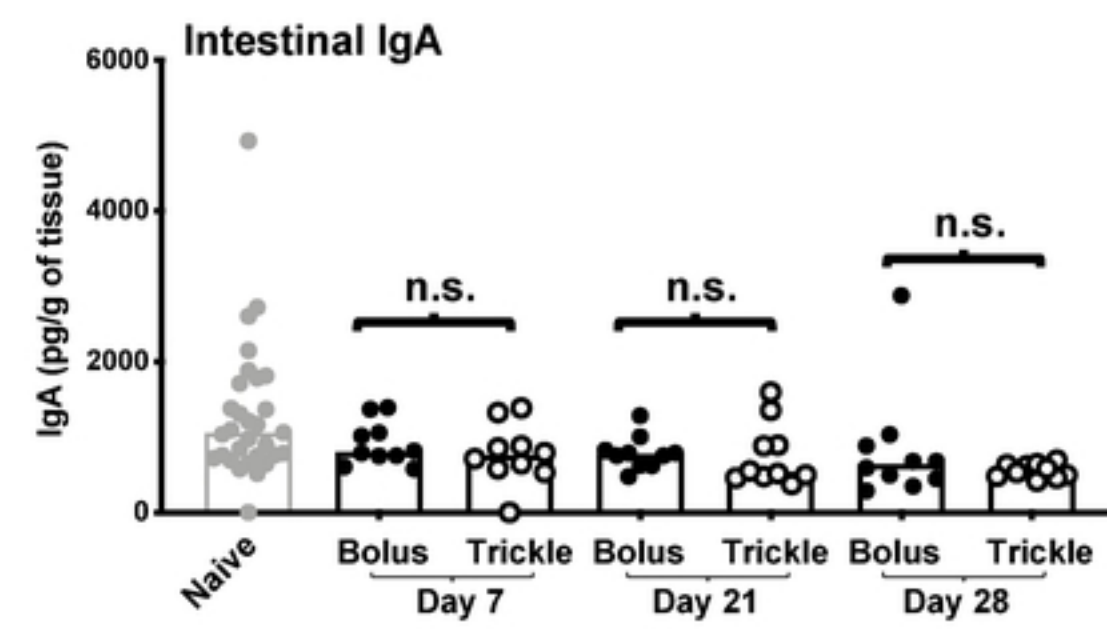

Figure 4

**A.**

Naive

Bolus

Trickle

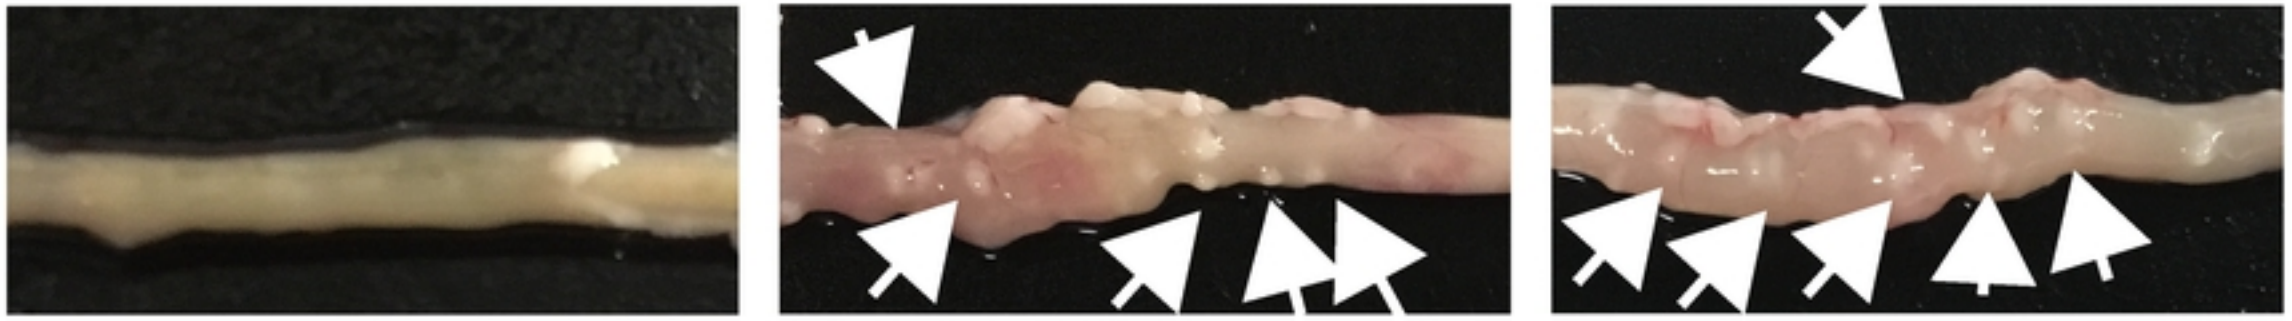**B.**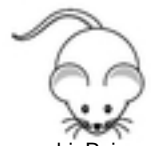

bioRxiv preprint doi: <https://doi.org/10.1101/2020.12.17.423220>; this version posted December 17, 2020. The copyright holder for this preprint (which was not certified by peer review) is the author/funder, who has granted bioRxiv a license to display the preprint in perpetuity. It is made available under aCC-BY 4.0 International license.

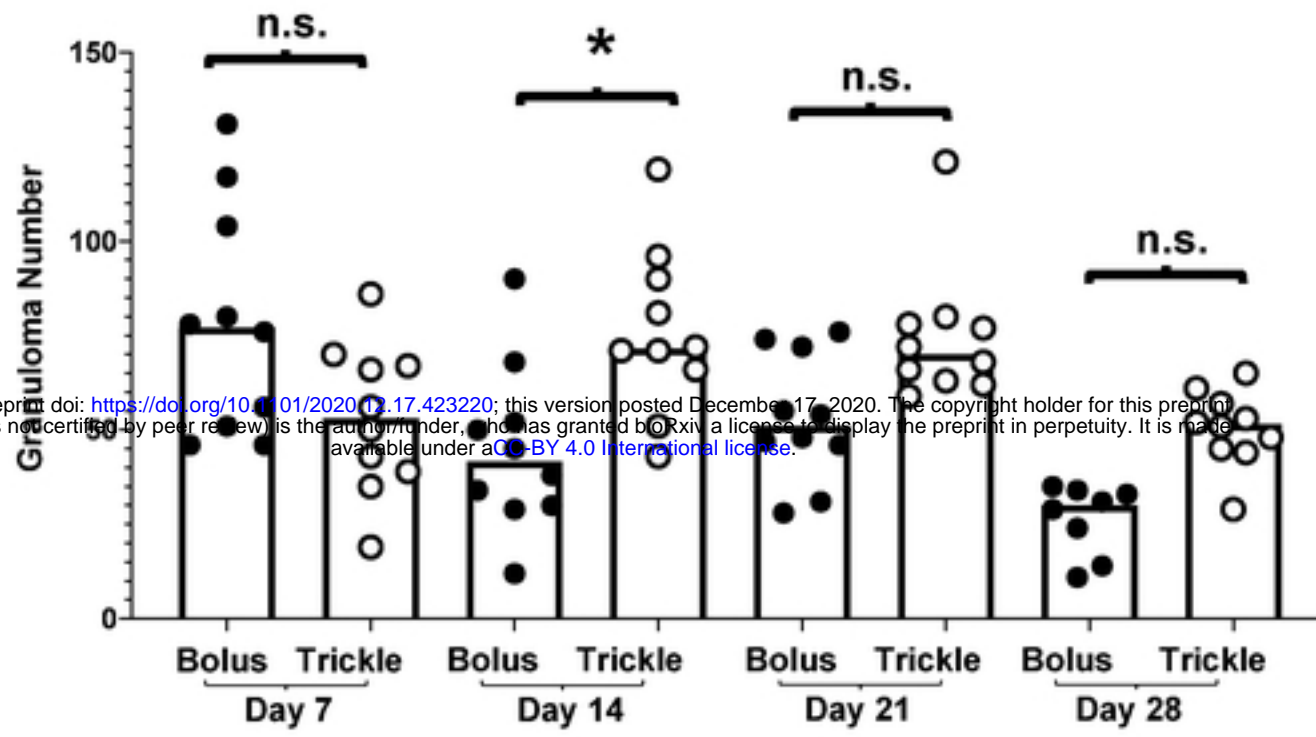**C.**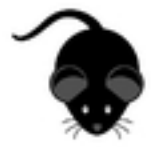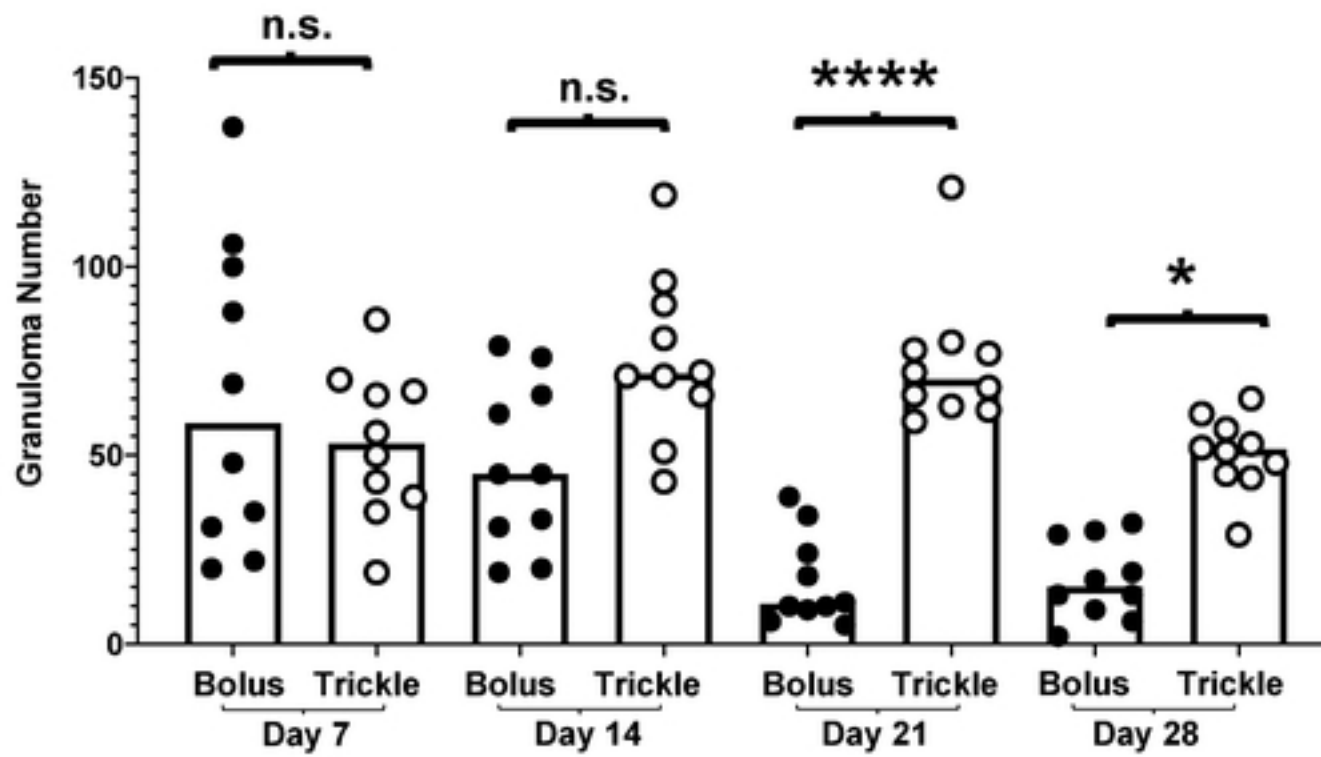

Figure 5

## Day 7

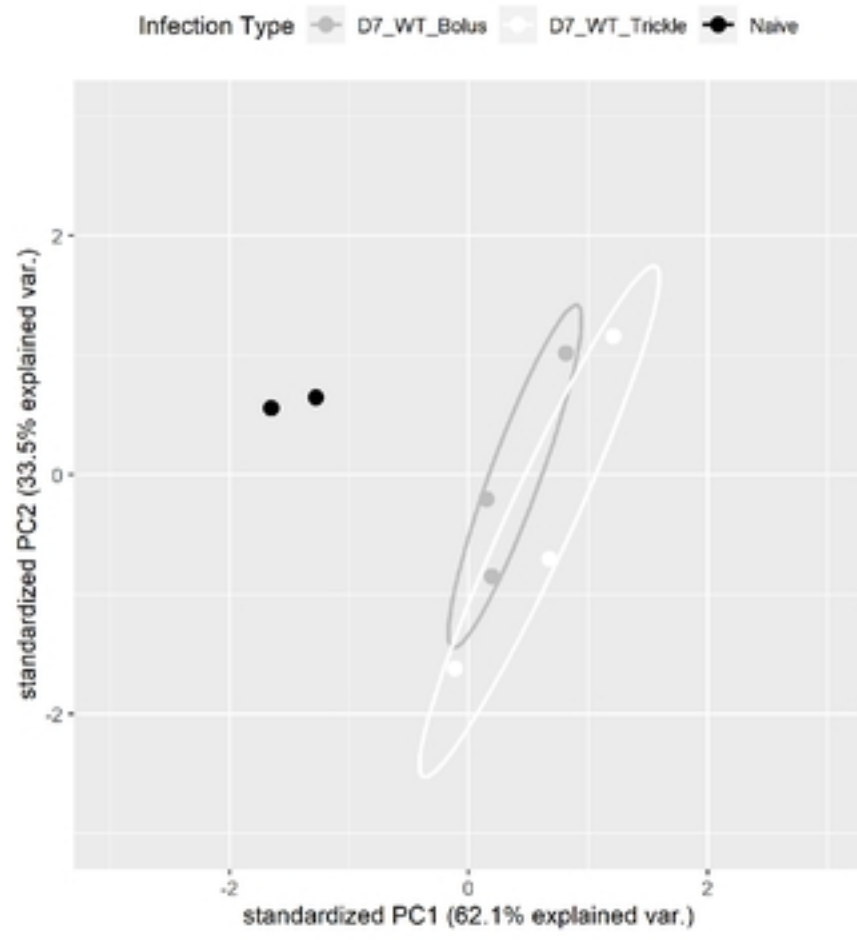

## Day 21

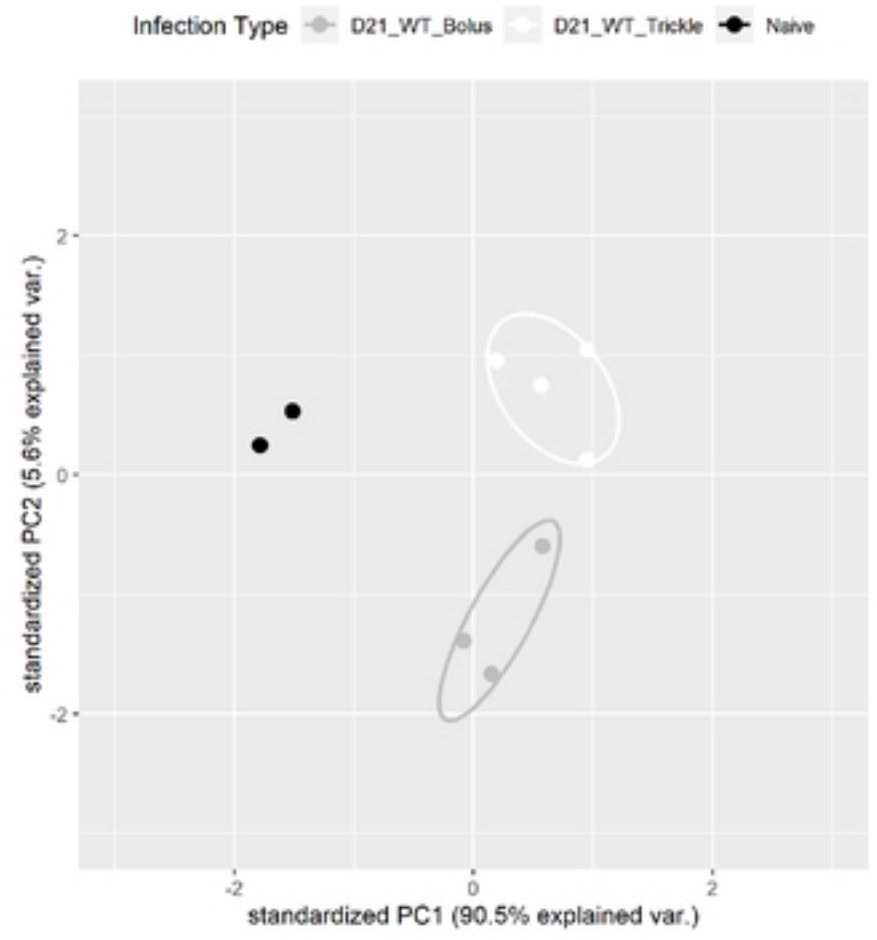

bioRxiv preprint doi: <https://doi.org/10.1101/2020.12.17.423220>; this version posted December 17, 2020. The copyright holder for this preprint (which was not certified by peer review) is the author/funder, who has granted bioRxiv a license to display the preprint in perpetuity. It is made available under aCC-BY 4.0 International license.

**A.**

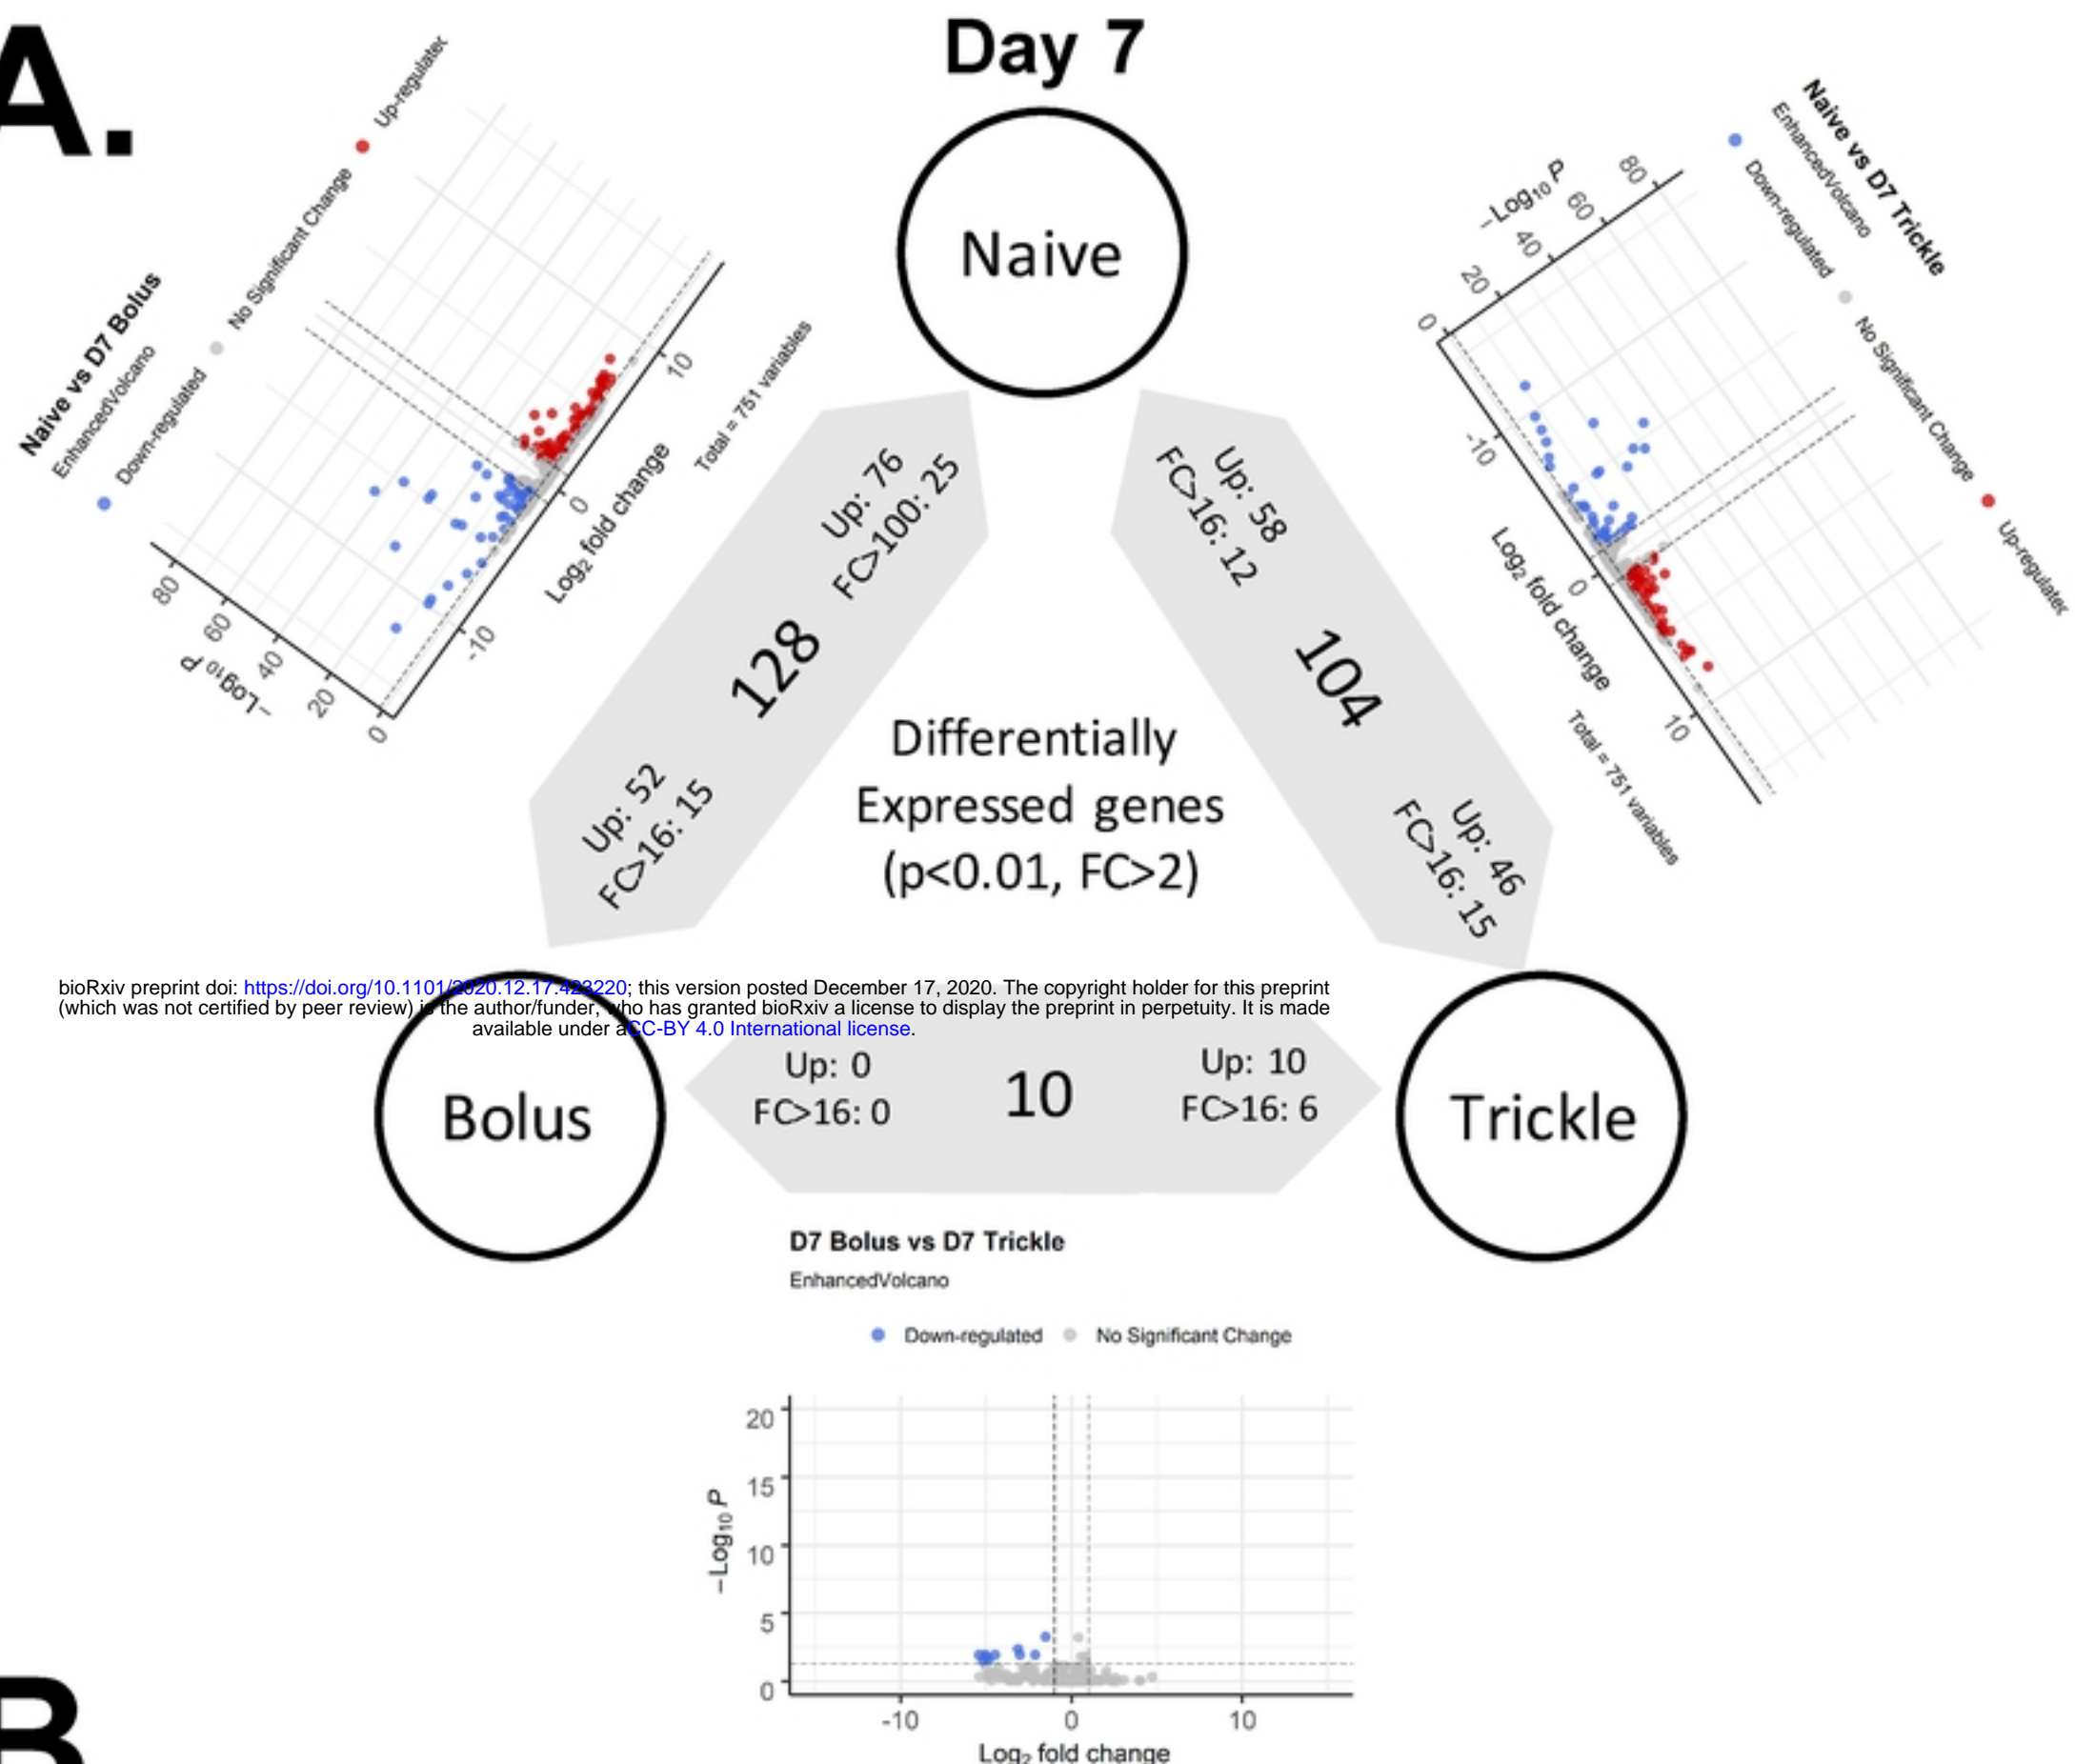

bioRxiv preprint doi: <https://doi.org/10.1101/2020.12.17.422220>; this version posted December 17, 2020. The copyright holder for this preprint (which was not certified by peer review) is the author/funder, who has granted bioRxiv a license to display the preprint in perpetuity. It is made available under aCC-BY 4.0 International license.

**B.**

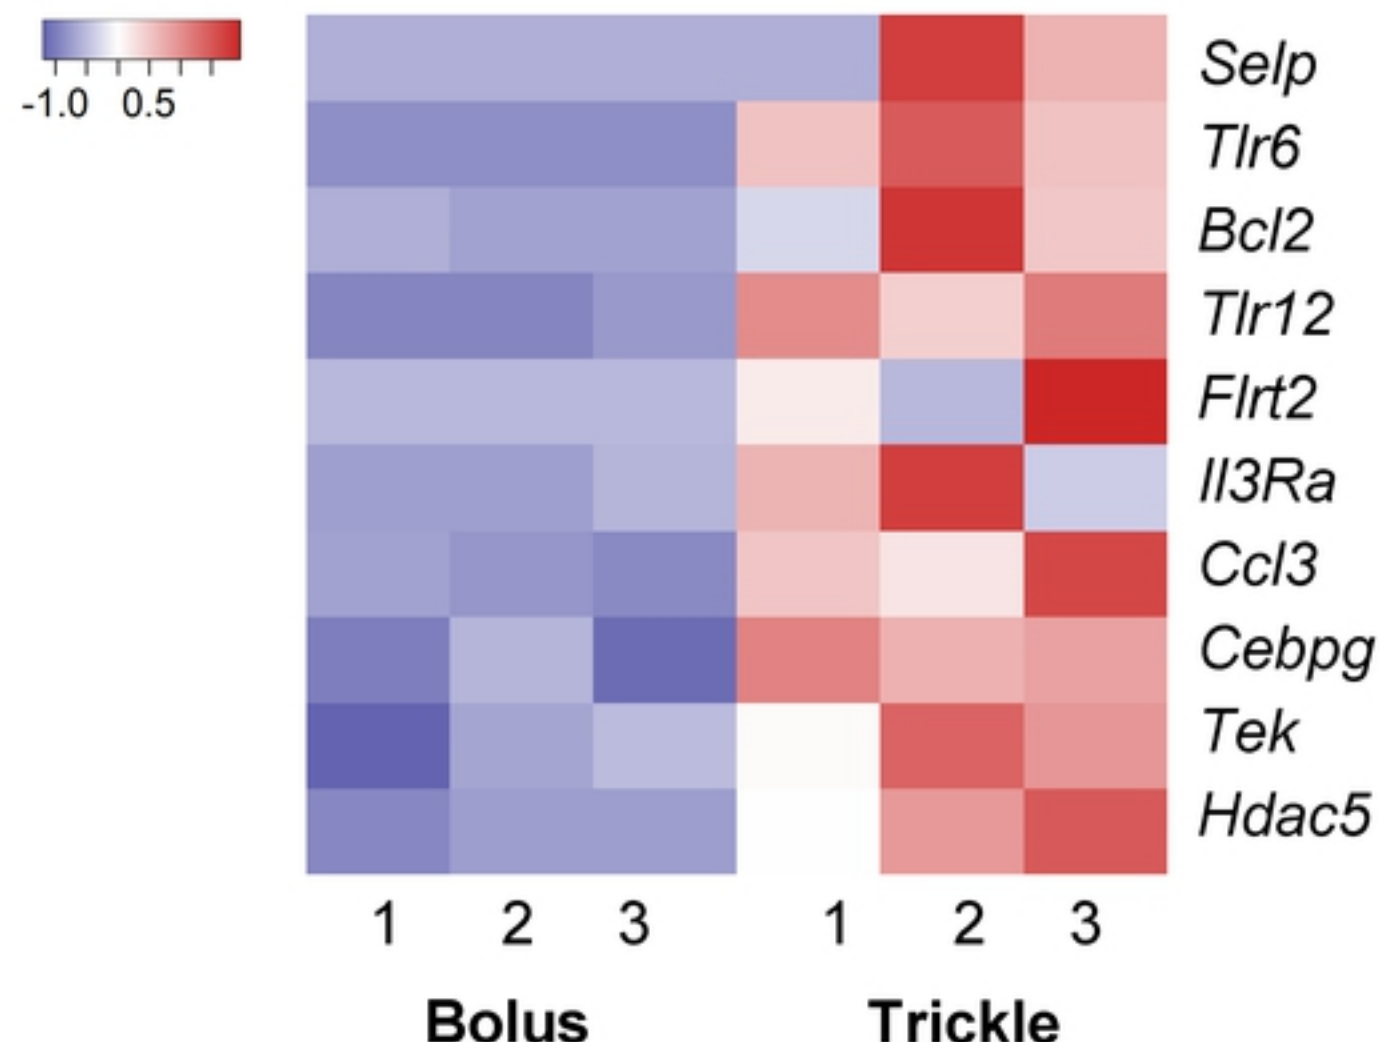

Figure 7

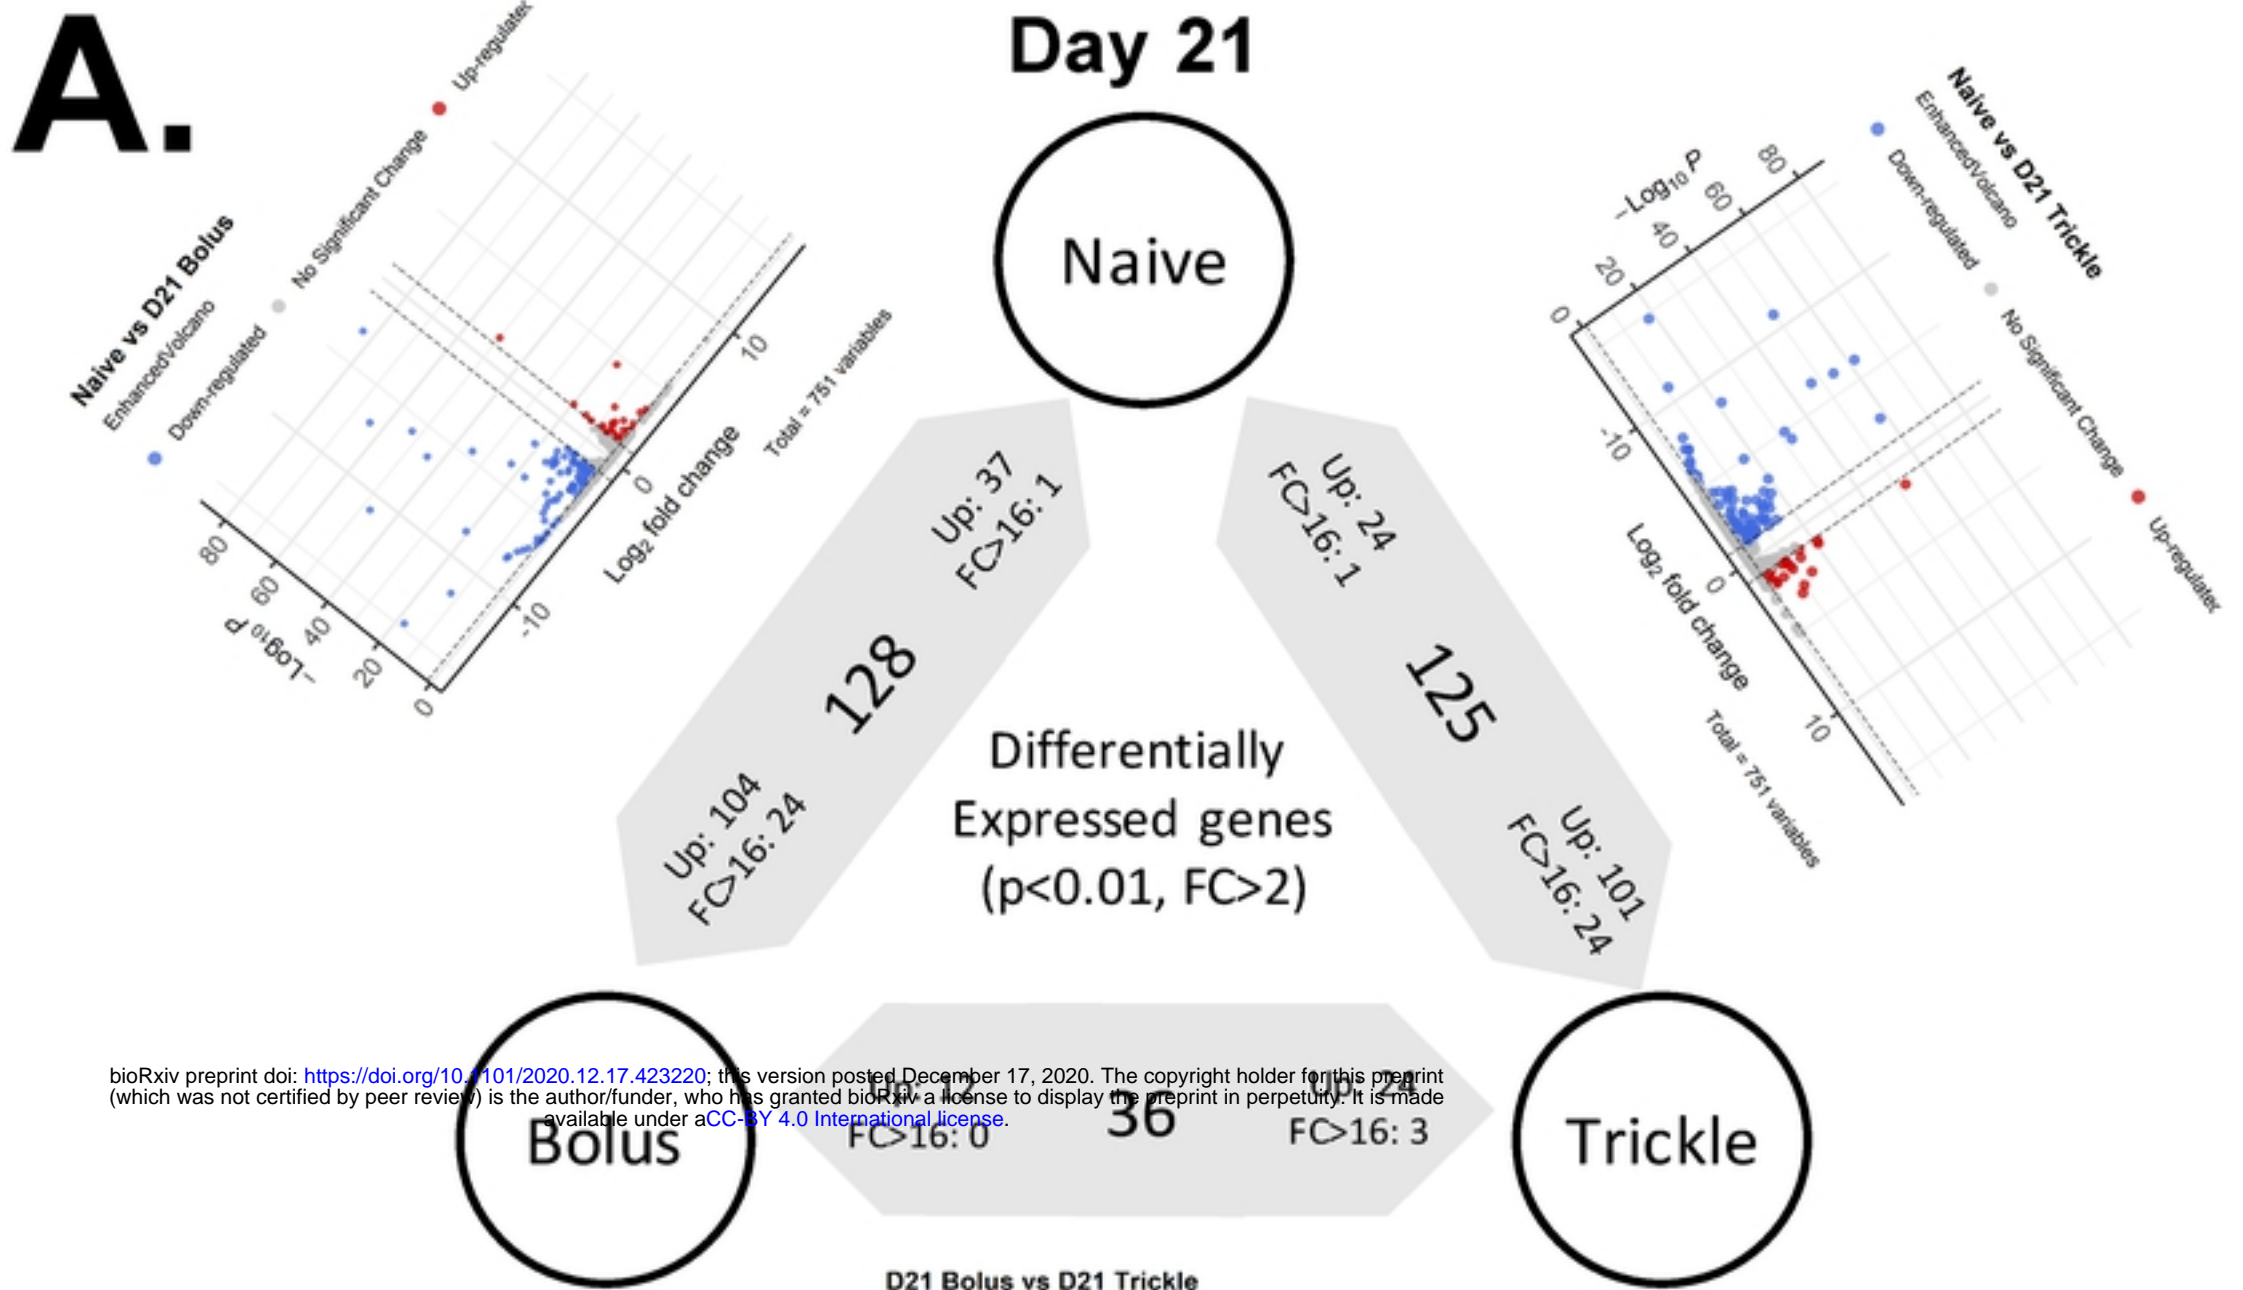

bioRxiv preprint doi: <https://doi.org/10.1101/2020.12.17.423220>; this version posted December 17, 2020. The copyright holder for this preprint (which was not certified by peer review) is the author/funder, who has granted bioRxiv a license to display the preprint in perpetuity. It is made available under aCC-BY 4.0 International license.

**B.**

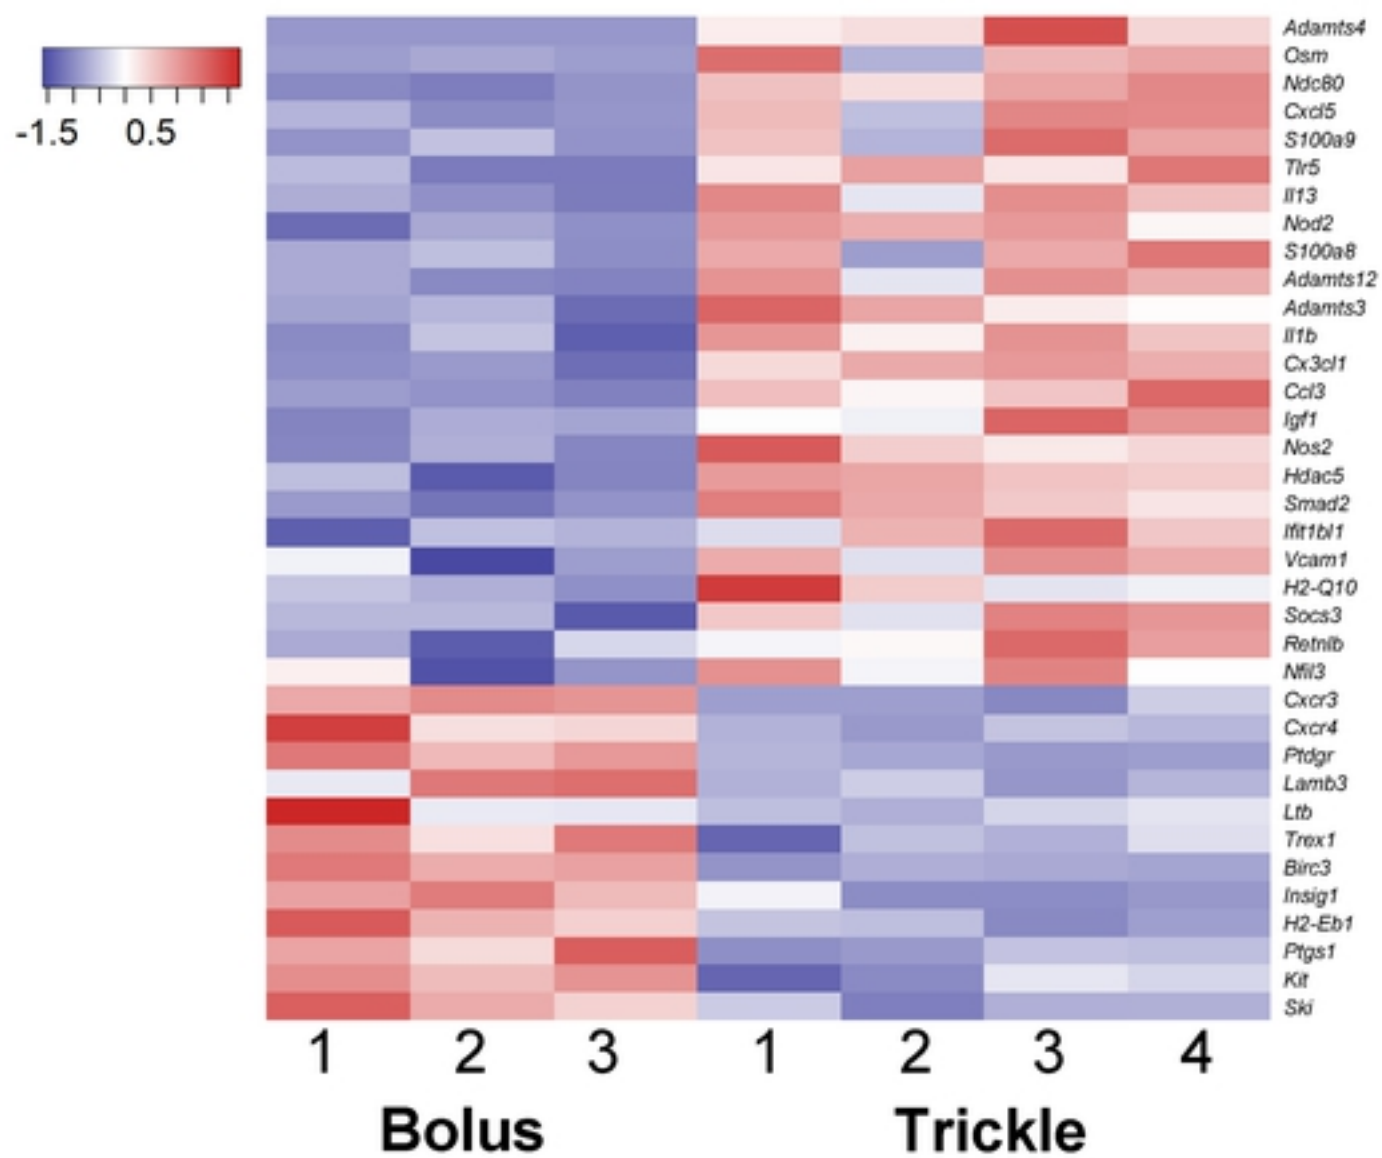

Figure 8

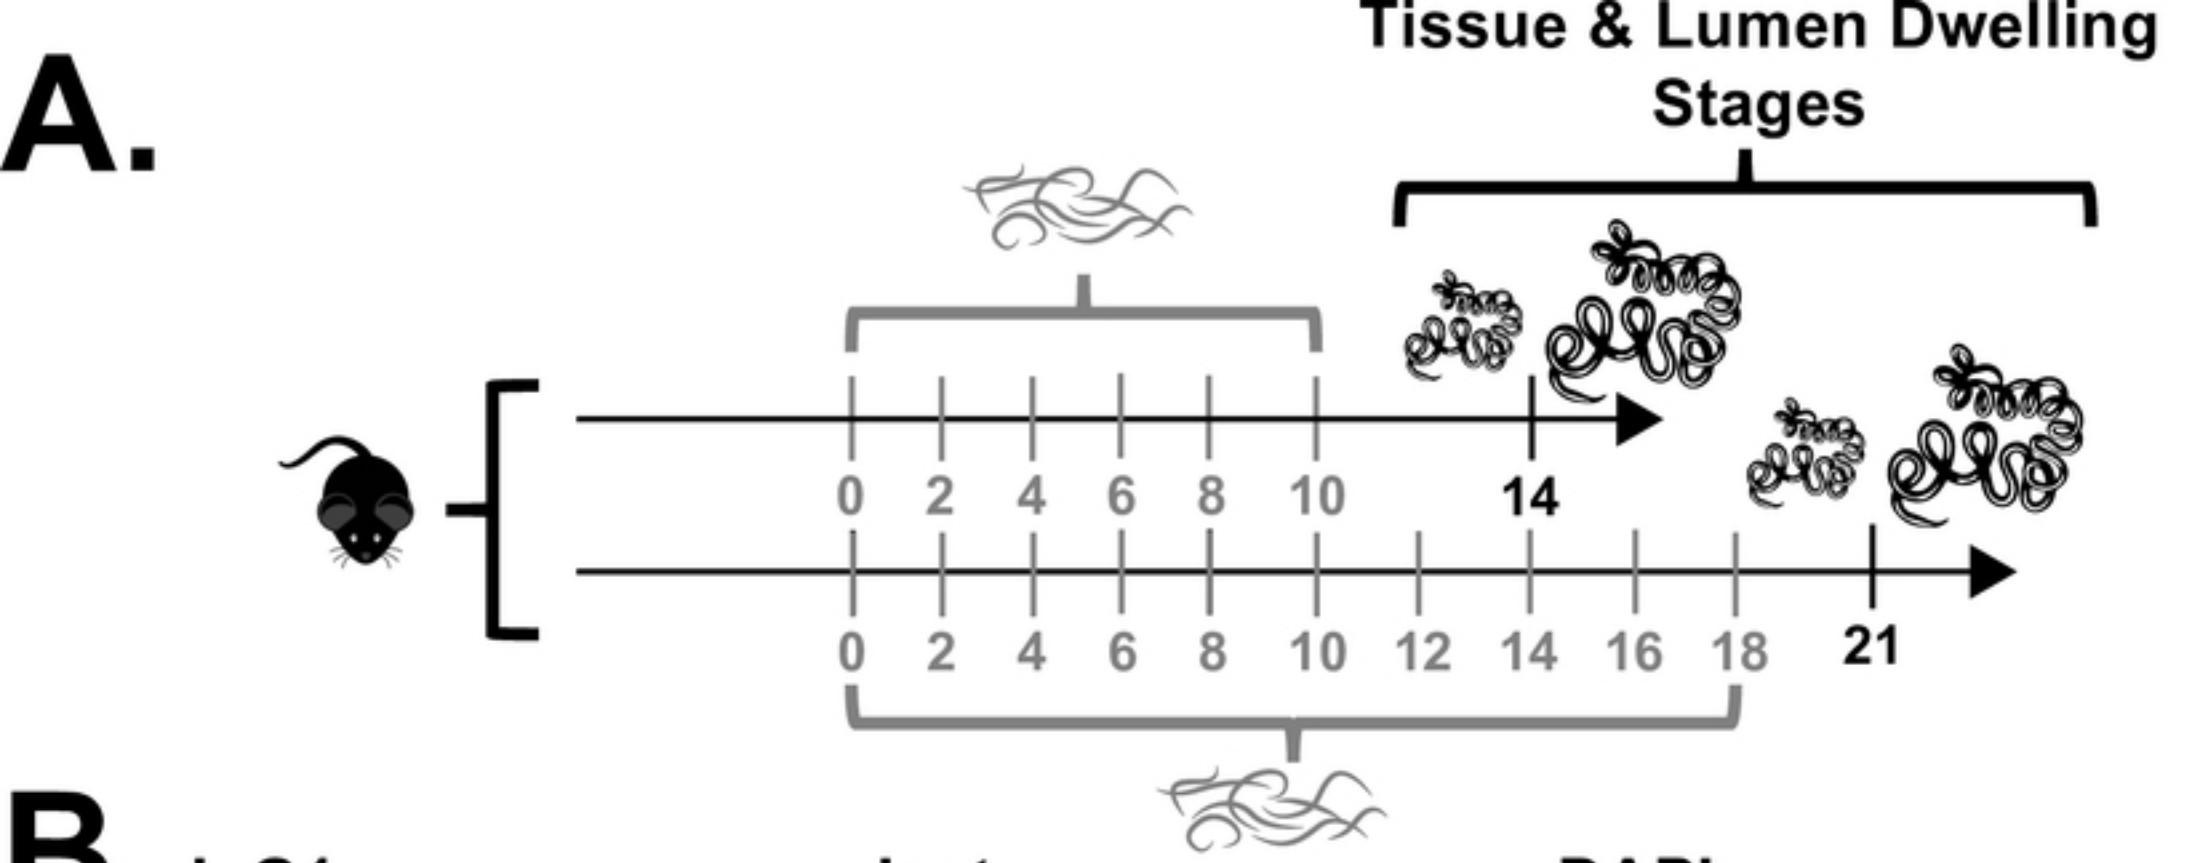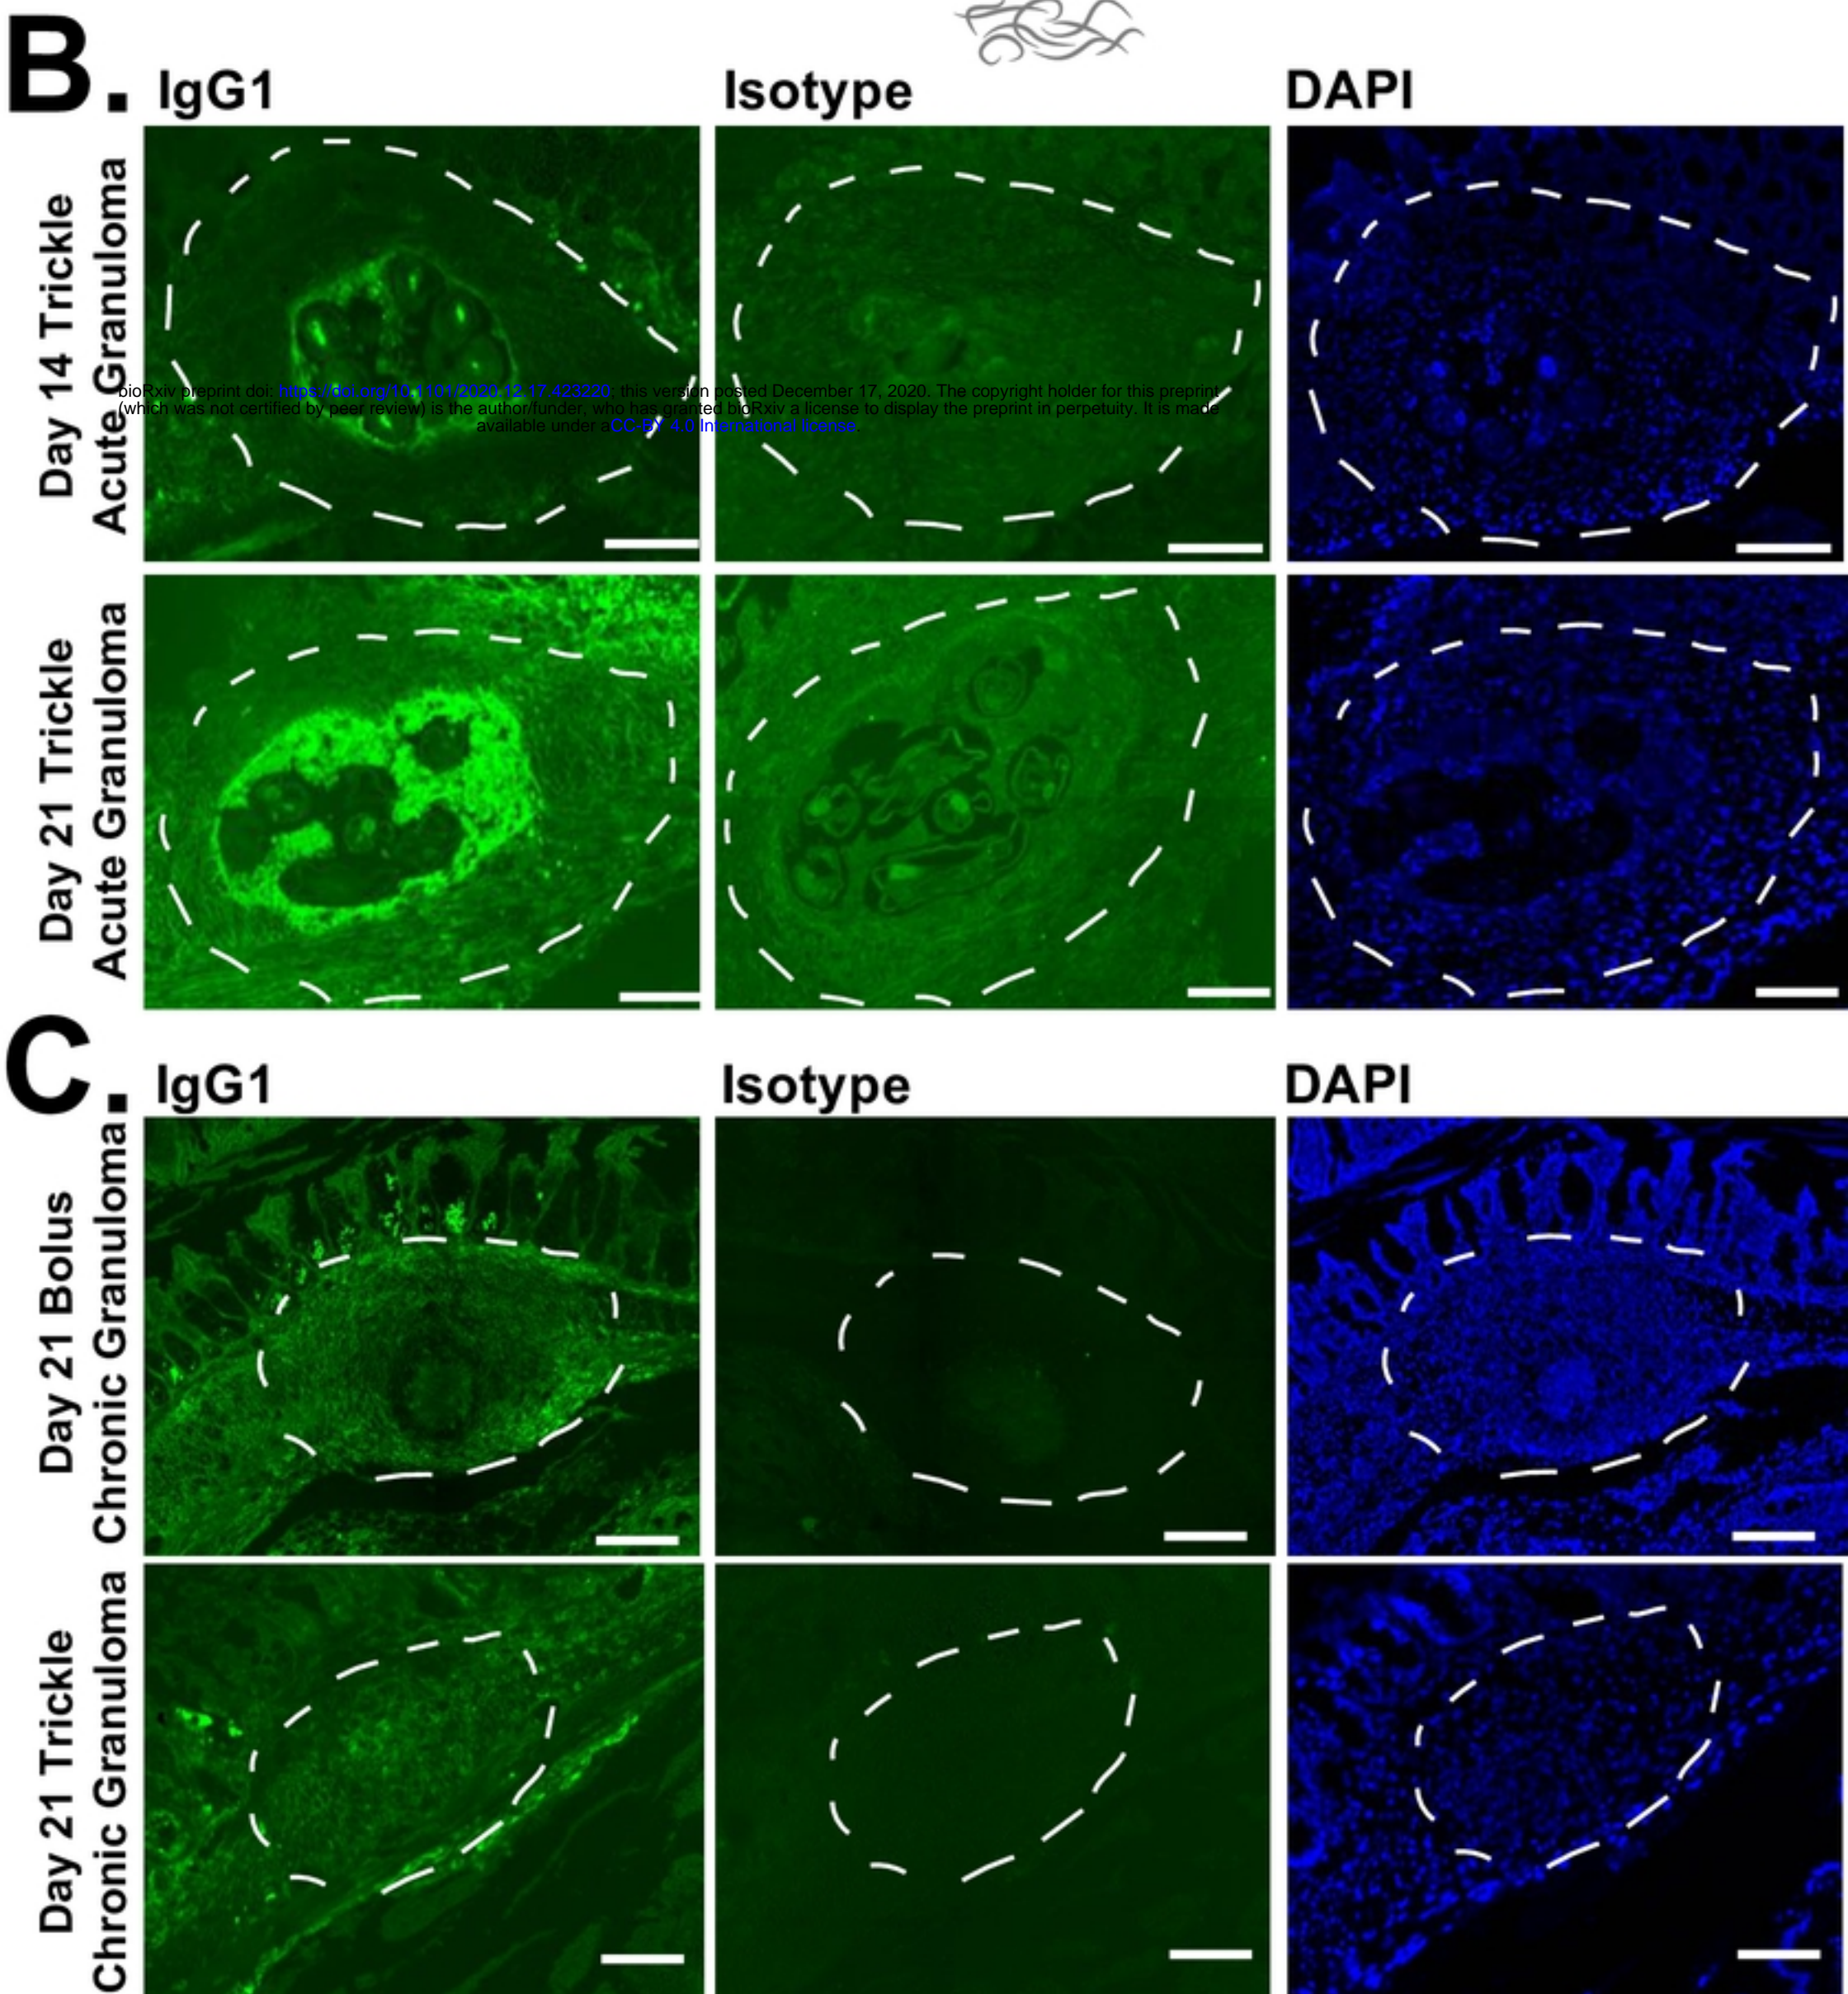

Figure 9

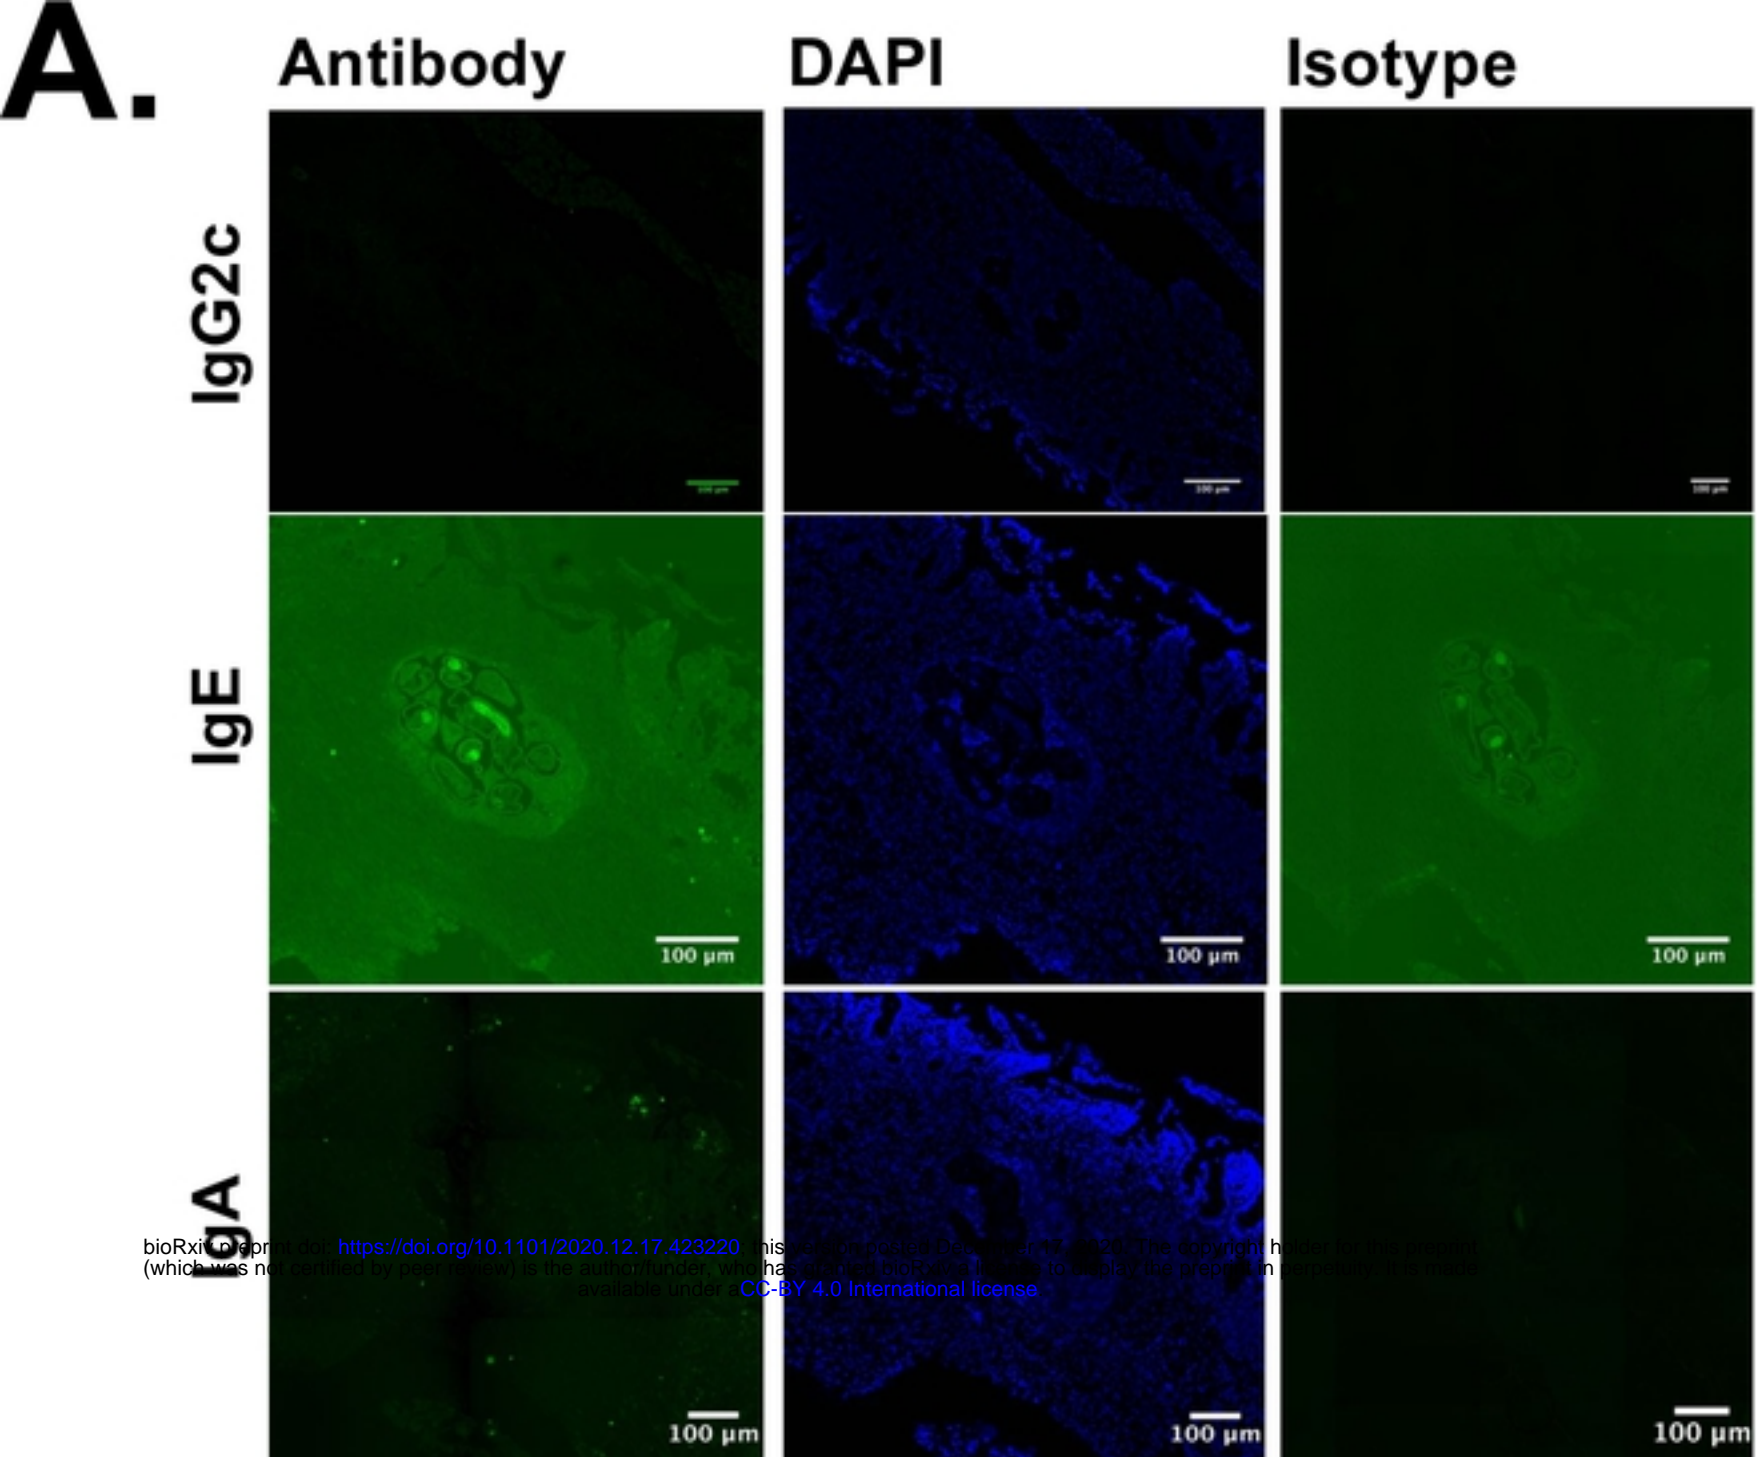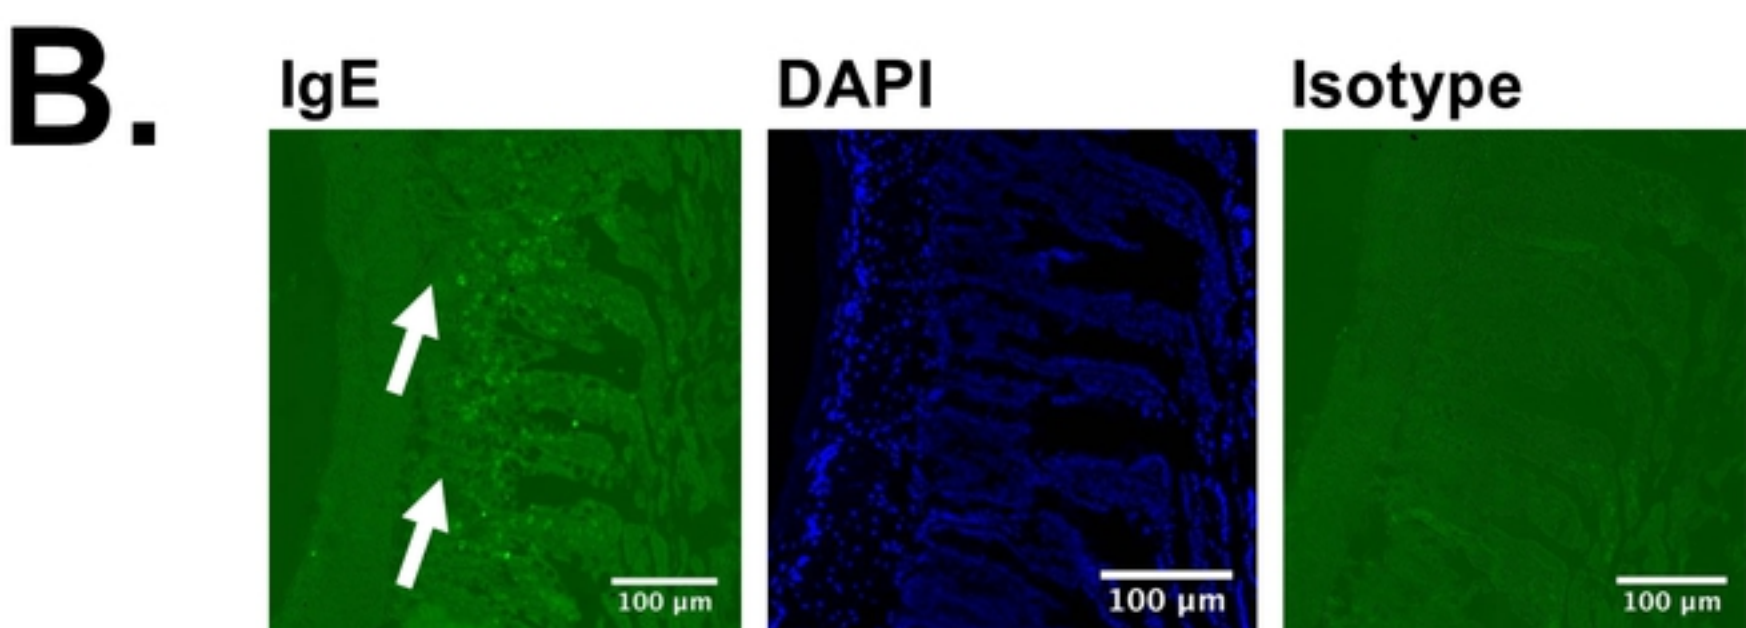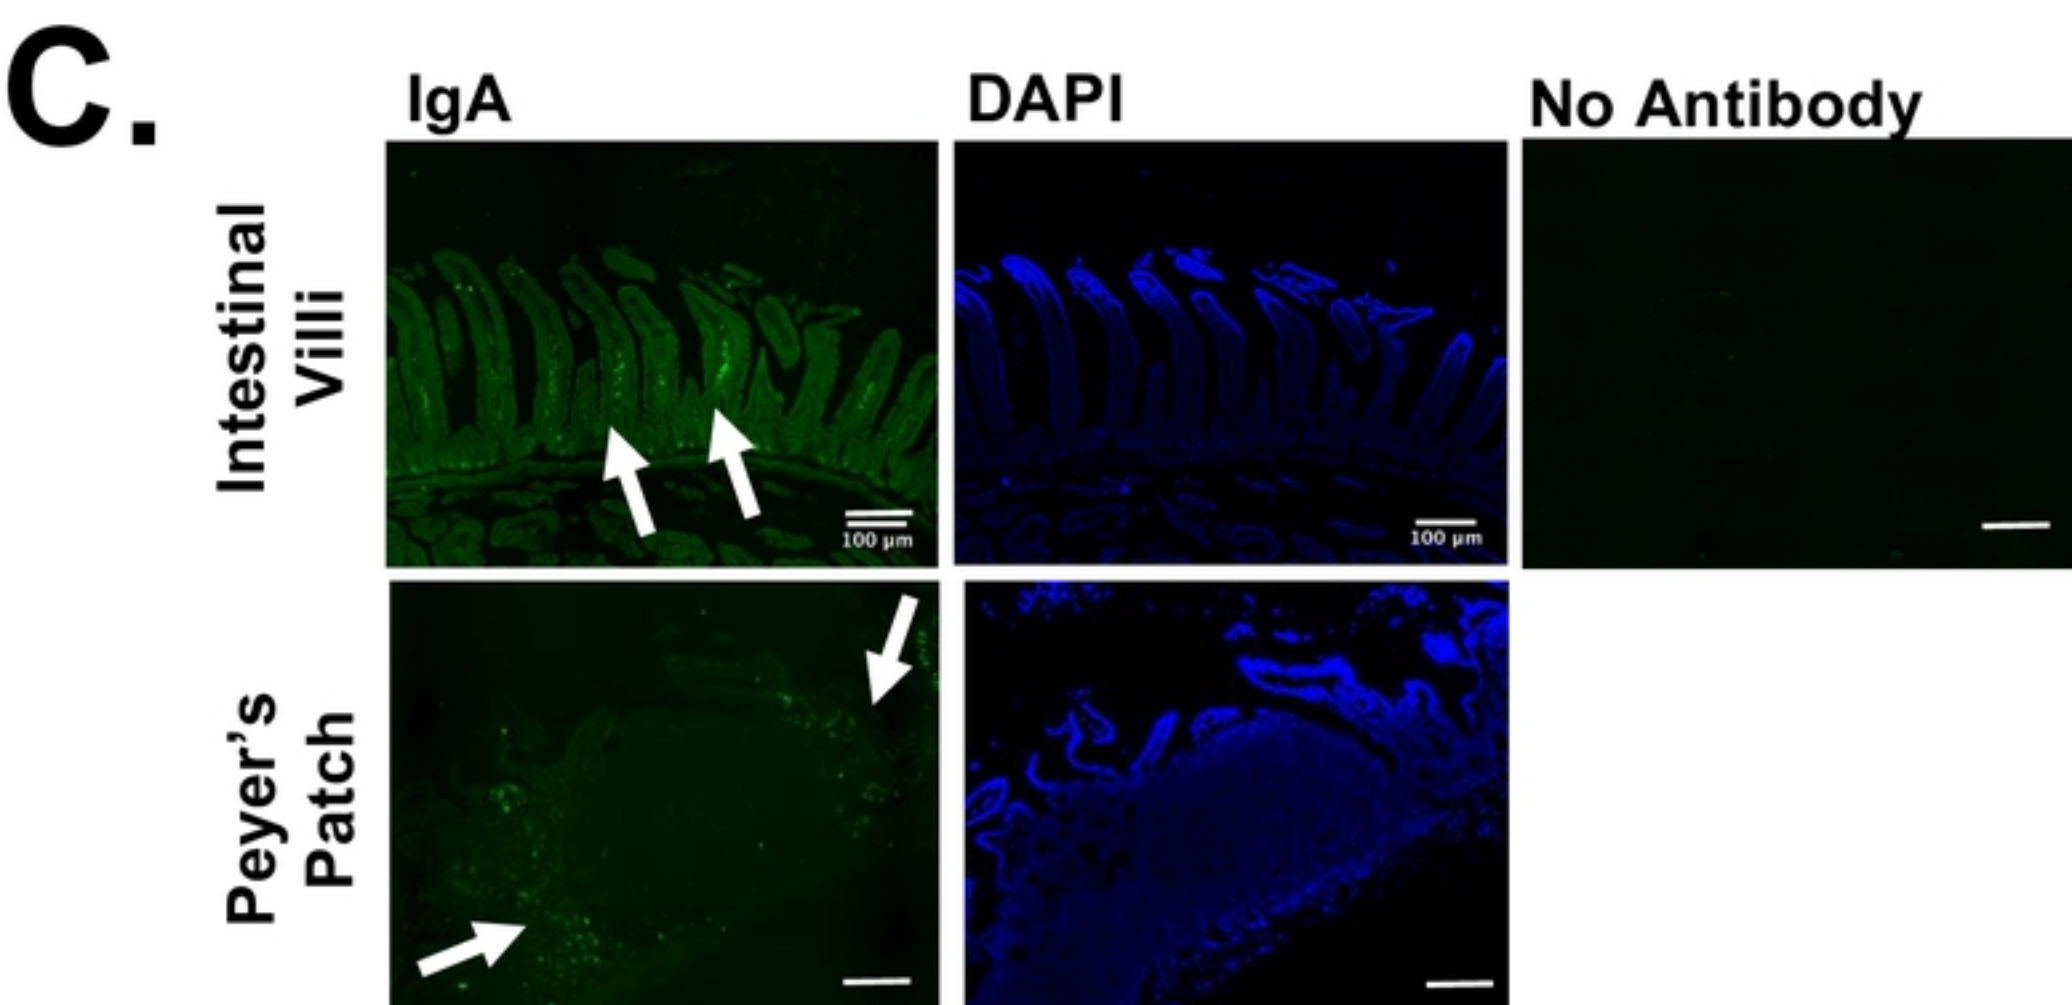

Figure 10
